# Supplementary material for: Preventing emergency department (ED) visits and hospitalisations of older adults with cognitive impairment compared with the general senior population: what do we know about avoidable incidents? Results from a scoping review
Source: PubMed Central journal article supplement — BMJ Open. 2018 Apr 17;8(4):e019908. doi: 10.1136/bmjopen-2017-019908 (PMC5905733; doi:10.1136/bmjopen-2017-019908), 2018-04-17
Supplement: bmjopen-2017-019908.draft_revisions.pdf [file bmjopen-2017-019908.draft_revisions.pdf]

# BMJ Open

BMJ Open is committed to open peer review. As part of this commitment we make the peer review history of every article we publish publicly available.

When an article is published we post the peer reviewers' comments and the authors' responses online. We also post the versions of the paper that were used during peer review. These are the versions that the peer review comments apply to.

The versions of the paper that follow are the versions that were submitted during the peer review process. They are not the versions of record or the final published versions. They should not be cited or distributed as the published version of this manuscript.

BMJ Open is an open access journal and the full, final, typeset and author-corrected version of record of the manuscript is available on our site with no access controls, subscription charges or pay-per-view fees (<http://bmjopen.bmj.com>).

If you have any questions on BMJ Open's open peer review process please email [info.bmjopen@bmj.com](mailto:info.bmjopen@bmj.com)

# BMJ Open

## Preventing emergency department (ED) visits by older adults with cognitive impairment: what do we know about avoidable incidents? Results from a scoping review

|                                 |                                                                                                                                                                                                                                                                                                                                                                                                                                                                                                                                     |
|---------------------------------|-------------------------------------------------------------------------------------------------------------------------------------------------------------------------------------------------------------------------------------------------------------------------------------------------------------------------------------------------------------------------------------------------------------------------------------------------------------------------------------------------------------------------------------|
| Journal:                        | <i>BMJ Open</i>                                                                                                                                                                                                                                                                                                                                                                                                                                                                                                                     |
| Manuscript ID                   | bmjopen-2017-019908                                                                                                                                                                                                                                                                                                                                                                                                                                                                                                                 |
| Article Type:                   | Research                                                                                                                                                                                                                                                                                                                                                                                                                                                                                                                            |
| Date Submitted by the Author:   | 04-Oct-2017                                                                                                                                                                                                                                                                                                                                                                                                                                                                                                                         |
| Complete List of Authors:       | Gagnon-Roy, Mireille; Université de Montréal, École de réadaptation hami, benyahia; Université de Sherbrooke, Faculté de médecine et des sciences de la santé<br>Généreux, Mélissa; Direction de la Santé Publique de l'Estrie-CIUSS de l'Estrie-CHUS<br>Veillette, Nathalie; Université de Montréal, École de réadaptation<br>Sirois, Marie-Josée; Université Laval, Département de réadaptation<br>Egan, Mary; University of Ottawa, Rehabilitation Sciences<br>Provencher, Véronique; Centre de recherche sur le vieillissement, |
| <b>Primary Subject Heading</b>: | Emergency medicine                                                                                                                                                                                                                                                                                                                                                                                                                                                                                                                  |
| Secondary Subject Heading:      | Public health                                                                                                                                                                                                                                                                                                                                                                                                                                                                                                                       |
| Keywords:                       | Accident prevention, Emergency Department Visit, Older Adults, Cognitive Impairment                                                                                                                                                                                                                                                                                                                                                                                                                                                 |
|                                 |                                                                                                                                                                                                                                                                                                                                                                                                                                                                                                                                     |

SCHOLARONE™  
Manuscripts

**Title:**

**Preventing emergency department (ED) visits by older adults with cognitive impairment: what do we know about avoidable incidents? Results from a scoping review.**

**Authors' names and affiliations:**

Mireille Gagnon-Roy, École de réadaptation, Faculté de médecine, Université de Montréal, Montréal, QC, Canada

Benyahia Hami, Faculty of Medicine and Health Sciences, University of Sherbrooke, Research Centre on Aging, Sherbrooke, QC, Canada

Mélissa Généreux, Direction de la Santé Publique de l'Estrie-CIUSS de l'Estrie-CHUS, Sherbrooke, QC, Canada

Nathalie Veillette, École de réadaptation, Faculté de médecine, Université de Montréal, Centre de recherche de l'IUGM, Montréal, QC, Canada

Marie-Josée Sirois, Département de réadaptation, Faculté de médecine, Université Laval, CHU de Québec, Québec, QC, Canada

Mary Egan, Rehabilitation Sciences, Faculty of Health Sciences, University of Ottawa, Bruyere Institute, Ottawa, ON, Canada

Véronique Provencher, Centre de recherche sur le vieillissement, CSSS-IUGS, Sherbrooke, QC, Canada, J1H 4C4; 1-819-821-8000 post 70525 [veronique.provencher@usherbrooke.ca](mailto:veronique.provencher@usherbrooke.ca)

**Keywords:**

Accident Prevention, Emergency Department Visit, Older Adults, Cognitive Impairment.

**Number of words:** 4083 words

## ABSTRACT

**Objectives:** Older cognitively impaired adults present a higher risk of hospitalization and mortality following a visit to the emergency department (ED). Better understanding of “avoidable” incidents is needed to prevent them and the associated ED presentations in community-dwelling adults. This study aimed to synthesize the actual knowledge concerning these incidents leading this population to ED presentation, as well as possible preventive measures to reduce them.

**Design:** A scoping review was performed according to the Arksey and O’Malley (2005) framework.

**Methods:** Scientific and gray literature published between 1996 and 2017 were examined in databases (MEDLINE, CINAHL, Ageline, SCOPUS, ProQuest Dissertations/theses, EBM Reviews, Healthstar), online library catalogues, governmental websites and published statistics. Sources discussing “avoidable” incidents leading to an ED presentation were included, and then extended to those discussing hospitalization and mortality, due to a lack of sources. Data (type, frequency, severity and circumstances of incidents, preventive measures) was extracted using a thematic chart, then analysed with content analysis.

**Results:** 67 sources were included in this scoping review. Five types of “avoidable” incidents (falls, burns, transport accidents, harm due to self-negligence, and due to wandering) emerged, and all but transport accidents were more frequent in cognitively impaired seniors. Differences regarding circumstances were only reported for burns, as scalding was the most prevalent mechanism of injury for this population, compared to flames for the general senior population. Multifactorial interventions and implications of other professionals (e.g. pharmacist, firefighters) were reported as potential interventions to reduce avoidable incidents. However, few preventive measures were specifically tested in this population.

**Conclusions:** Primary research that screens for cognitive impairment and involves actors (e.g. paramedics) to improve our understanding of “avoidable” incidents leading to ED visits is greatly needed. This knowledge is essential to develop preventive measures tailored to the needs of older cognitively impaired adults.

## STRENGTHS AND LIMITATIONS OF THIS STUDY

- This study provides an accurate overview of the current knowledge about “avoidable” incidents leading older adults, with and without cognitive impairment, to an ED presentation, as well as preventive measures that may be implemented to avoid these incidents.
- This study followed a rigorous method, guided by two experienced librarians, completed independently by at least two reviewers at each step, and reviewed by experienced researchers and stakeholders in the field.
- Some “avoidable” incidents were not discussed in this scoping review, as they were not differentiable from medical conditions (e.g. urinary tract infection due to dehydration).
- Considering the lack of sources focussing on ED presentation and avoidable incidents, sources discussing hospitalizations and mortalities were included for some types of incidents (e.g. burns) to better understand them.

## INTRODUCTION

As the worldwide population ages, an increasing number of older adults (65+) are consulting at emergency departments (ED). In Canada, this population is 1.5 times more likely to visit the ED than the younger population.[1] Furthermore, among these older adults, between 21 to 42% present with cognitive impairment, which exacerbates the risk of negative outcomes following an ED visit, and reduces the probability of returning home.[2–6] Considering the high costs and negative consequences associated with this sub-population's use of ED and hospital healthcare services,[1] it is crucial to prevent potentially avoidable incidents leading to ED visits, especially in older adults with cognitive impairment.

Avoidable incidents, which may refer to unintentional injuries due to falls, motor vehicle traffic crashes, toxic substances, fire/hot objects, or other external causes,[7] represent a large proportion (over 20%) of ED visits by older adults.[8–11] Those with cognitive impairment often present judgment errors and self-neglect behaviors, which may put them at a higher risk of various avoidable injuries (e.g. burning themselves while cooking, due to forgetting to turn off electrical appliances, poisoning after eating spoiled food in the refrigerator, falls caused by failure to use walking aids).[12,13] Many preventive measures (e.g. fall prevention programs and driving classes for seniors) have been developed and implemented to reduce avoidable incidents in community-dwelling adults.[14–16] However, these preventive measures may not be tailored to the specific needs of older adults with cognitive impairment, as most were not developed for this vulnerable population, or may exclude it altogether.[17,18] As a result, little is known about best measures to implement to reduce avoidable incidents and ED visits in this sub-population. Increased knowledge about avoidable incidents leading older adults with cognitive impairment to ED presentations and the circumstances in which they occur, compared to the senior population in general, will help to identify appropriate preventive measures that could be implemented upstream.

This study aims at synthesizing the current knowledge related to avoidable incidents leading to ED presentations by older people with cognitive impairment living in the community, as well as potential preventive measures aiming at reducing them. More specifically, we aimed to identify (1) the type, frequency, and severity of avoidable incidents associated with presentations to the ED by older adults with cognitive impairment, compared to the general senior population, (2) the circumstances in which they occurred and (3) if they could have been avoided by safe and healthy environments or behaviors.

1  
2  
3 Results of this study could then be used by the Public Health actors in the province of Quebec  
4 (Canada), to promote safe and healthy environments and behaviours, which has been identified as a  
5 key priority for the upcoming years.[19]  
6  
7

## 8 9 **METHODOLOGY**

10  
11 Scoping reviews are increasingly popular in health sciences research. Contrary to other reviews,  
12 scoping reviews include a wide variety of sources and study designs, enabling the exploration of  
13 emerging subjects, or scattered knowledge. As an initial step to identify priorities for the development  
14 of a comprehensive preventive approach, this method was preferred to other types of reviews, as it  
15 provides the opportunity to: (A) map the extent of the actual knowledge on a subject, (B) assess the  
16 possibility to conduct a systematic review, (C) synthesize and disseminate research results and (D)  
17 identify future primary researches to conduct to fully understand it.[20,21] Results of this study could  
18 be used by the Public Health actors in the province of Quebec (Canada) to help design preventive  
19 measures aiming at reducing avoidable incidents in the vulnerable sub-population of older adults with  
20 cognitive impairment. This project followed the six stages refined by Levac et al.[22] according to  
21 Arksey and O'Malley methodology.[23]  
22  
23  
24  
25  
26  
27  
28  
29  
30

### 31 **Step 1: Identifying the research question**

32 This scoping review aimed to answer the main research question: “What is the actual knowledge on  
33 “avoidable” incidents leading to ED presentation by older adults living in the community, particularly  
34 those with cognitive impairment, in order to implement preventive measures that are tailored to their  
35 needs?” To our knowledge, there are no other scoping reviews on this topic. Four specific questions  
36 were identified in collaboration with the Regional Public Health Department (Dr. Généreux):  
37  
38  
39  
40  
41

- 42 1) What are the main types of avoidable incidents associated with presentations to the ED by  
43 seniors with cognitive impairment, compared to the general senior population (e.g., fall-  
44 related injuries, food poisoning, heat stroke)?
- 45 2) Are they more or less frequent and serious compared to older adults without cognitive  
46 impairment?
- 47 3) Do they occur in specific circumstances (e.g., during the day/night, in the summer/winter,  
48 indoor/outdoor, when driving/cooking)?
- 49 4) Could they have been avoided by safe and healthy environments or behaviors?  
50  
51  
52  
53  
54  
55  
56  
57  
58  
59  
60

1  
2  
3 For this review, incidents were defined as physical injuries to self or others, property loss, or property  
4 damage. More precisely, avoidable incidents referred to traumatic injuries (e.g., hip, wrist), poisoning  
5 (e.g., inadvertent medication overdose, biological substances) and some other consequences of  
6 external causes (e.g., frostbite, burn, heat stroke).[24]  
7  
8  
9

## 10 **Step 2: Identifying the relevant sources**

11 Using a research strategy validated by two librarians (FL and KR), scientific and grey literature  
12 published in English and in French between 1996 and 2016 was explored through a variety of  
13 databases (MEDLINE, CINAHL, Ageline, Scopus, ProQuest Dissertation/theses, EBM Reviews,  
14 Healthstar), online library catalogue (Institut Universitaire de Gériatrie de Montréal (IUGM)), Google  
15 Scholar (100 first results) and Canadian government websites (Canadian Institute for Health  
16 Information, Canadian Community Health Survey, National Ambulatory Care Reporting System,  
17 Institut de la statistique du Québec). Controlled and natural keywords used in the research strategy are  
18 displayed in supplementary files. A total of 654 sources were found and exported to reference  
19 manager software (Zotero). Following the elimination of duplicates and non-English or French  
20 sources, 633 scientific sources remained (see figure 1). An update of the literature published until  
21 April 2017 was also completed, increasing the number of sources to 656.  
22  
23  
24  
25  
26  
27  
28  
29  
30  
31

## 32 **Step 3: Selecting the studies**

33 Screening was then completed independently by two members of the research team (MGR and BH)  
34 and/or two collaborators (ACLC and SS) according to our inclusion criteria. More precisely, sources  
35 were included if the participants were: (a) 65 years old and over, with or without cognitive  
36 impairment as documented by screening tests or categorized by the authors of the sources (seniors  
37 who were reported “independent” by authors were also categorized as older adults without cognitive  
38 impairment), (b) living in the community (house, private residence, senior housing or other structured  
39 environments), and (c) presenting to the ED because of an avoidable incident. As incidents occurring  
40 in seniors with cognitive impairment were rarely discussed in literature, sources from other hospital  
41 settings (e.g., hospitalization) were also included when too few sources focused on ED visits.  
42 Furthermore, sources were considered if they focused on strategies and preventive measures to avoid  
43 these incidents. After screening by title and abstract, 153 sources remained. Finally, 67 sources were  
44 included for complete analysis. Reasons for exclusion are presented in Figure 1.  
45  
46  
47  
48  
49  
50  
51  
52  
53  
54  
55  
56  
57  
58  
59  
60



#### **Step 4: Charting the data**

A data charting form was developed by the first author and validated by two members of the research team (BH and VP) and two collaborators (SS and ACLC). The form included data about: (1) the type, frequency and severity of incidents, (2) circumstances of incidents (time of the day/year, location, activities at the time of the incident, potential causes for the incident, if available), (3) preventive measures which may be implemented to prevent avoidable incidents for older adults with cognitive impairment, and (4) the selected sources (year of publication, sample population, country, type/research design). Data charting was then performed independently by two members of the research team (MGR and BH) and/or two collaborators (SS and ACLC) using the developed data charting form. To insure interrater agreement, four articles were analyzed independently by the first author and each of the reviewers, and compared to highlight the differences. Disagreements were then discussed and settled by consensus.

#### **Step 5: Collecting, summarizing and reporting results**

Descriptive numerical summary analysis was completed regarding: 1) the characteristics of included sources and sample population, 2) the main types of incidents, their frequency and severity, and 3) the circumstances surrounding these incidents (e.g., time, location). On the other hand, the reasons of incidents, as well as preventive measures that may be used to avoid incidents with seniors living with cognitive impairment, were analyzed using a content analysis.[25] The analysis was completely and independently performed by two members of the research team (MGR and BH), and disagreements were discussed. When an agreement could not be reached, the disagreement was discussed with a third member (VP).

Results were reported using descriptive statistics and narrative synthesis, according to the main type of “avoidable” incidents emerging from literature.

#### **Step 6: Consultation**

Results were presented to stakeholders from the Regional Public Health Department in the province of Quebec (Canada), and researchers in gerontology and emergency department services. Using their feedback, results were then contextualized to the local healthcare system.

## RESULTS

### Overview of results

Study designs and definitions: Out of the 67 sources included in this scoping review, 29 were descriptive studies (43%), 10 were literature reviews, 4 were empirical studies, 4 were statistical papers, 4 were expert opinions, and 16 were documents from grey literature.

Population: 25 sources (37%) included participants with documented cognitive impairment, 6 sources included older adults without cognitive impairment as assessed by screening tests or reported as “independent in daily living activities” by authors, while 36 documents (54%) did not detail the cognitive status of older patients.

Setting: 24 sources included data from the ED (36%), 3 sources focused on the hospital care setting (e.g. hospitalizations) (4%), and 40 sources focused on the community (60%).

Types of incidents: The most commonly mentioned incidents were falls, which were mentioned in 49 papers (73%). Traffic accidents were mentioned in 14 papers (21%), followed by harm due to self-neglect (13%), burns (12%), and harm due to wandering (3%) (see figure 2). Preventive measures were discussed in 44 papers (66%).

Country of publication: Canadian and US studies dominated the review ( $n = 44$ ; 66%), with 23 and 21 sources, respectively. Six were from the U.K., three from Australia and New-Zealand, two from France, and two from Sweden.

Year of publication: One third of the sources was published in 2013-2017 ( $n = 22$ ; 33%), one quarter was published in 2008-2012 ( $n = 18$ ; 27%) and another quarter was published between 2003 and 2007 ( $n = 18$ ; 27%). The remaining ( $n = 9$ ; 13%) were published before 2002. Included sources are displayed in Table 1.

## TABLES

Tableau 1. The studies included in the scoping review

| Authors                                        | Year of publication | Country | Study design      | Setting* | Types of incidents** | Participants |             |              |                                                                                                                                         |                                                                                                                                                                              |
|------------------------------------------------|---------------------|---------|-------------------|----------|----------------------|--------------|-------------|--------------|-----------------------------------------------------------------------------------------------------------------------------------------|------------------------------------------------------------------------------------------------------------------------------------------------------------------------------|
|                                                |                     |         |                   |          |                      | CI***        | Sample size | Age          | Inclusion criteria                                                                                                                      | Exclusion criteria                                                                                                                                                           |
| Albert M, McCaig L, Ashman J [8]               | 2013                | USA     | Statistics        | ED       | F                    | No           | -           | ≥ 65         | -                                                                                                                                       | -                                                                                                                                                                            |
| Ng W et al. [9]                                | 2002                | Japan   | Descriptive study | ED       | TA+B                 | No           | 813         | ≥ 65         | • Cases of injury-related presentations in the elderly group.                                                                           |                                                                                                                                                                              |
| Canadian Institute for Health Information [10] | 2010                | Canada  | Statistics        | ED       | General              | No           | -           | ≥ 65         | • Ontario residents with an unplanned visit to the Emergency Department.                                                                |                                                                                                                                                                              |
| Ontario Injury Prevention Resource Centre [11] | 2007                | Canada  | Statistics        | ED       | F+TA                 | No           | -           | ≥ 65         | • Visiting an Emergency Department; or<br>• Admitted to an acute care hospital.                                                         |                                                                                                                                                                              |
| Tierney M, Charles J, Naglie G et al. [13]     | 2004                | Canada  | Descriptive study | C        | SN                   | Yes          | 139         | ≥ 65         | • Living alone;<br>• Urban-dwelling.                                                                                                    | • History of bipolar disorder or schizophrenia.                                                                                                                              |
| Shaw FE, Bond J, Richardson DA, et al. [26]    | 2003                | UK      | Empirical study   | ED       | F                    | Yes          | 274         | ≥ 65         | • Cognitive impairment and dementia (Mini-MentalState Examination score< 24);<br>• Presenting to the Emergency Department after a fall. | • Medical diagnosis that likely caused the fall;<br>• Unfitness for investigation within 4 months;<br>• Inability to walk or to communicate for reasons other than dementia. |
| Shaw F [27]                                    | 2003                | UK      | Author's opinion  | C        | F                    | Yes          | -           | Older adults | -                                                                                                                                       | -                                                                                                                                                                            |
| Gagnon C, Lafrance M [28]                      | 2011                | Canada  | Literature review | C        | F                    | No           | -           | ≥ 65         | -                                                                                                                                       | -                                                                                                                                                                            |
| Public Health Agency of Canada [29]            | 2011                | Canada  | Grey literature   | C        | F                    | No           | -           | Older adults | -                                                                                                                                       | -                                                                                                                                                                            |
| Raina P et al. [30]                            | 1997                | Canada  | Literature review | H        | F+TA                 | No           | -           | ≥ 65         | -                                                                                                                                       | -                                                                                                                                                                            |
| Public health agency of Canada [31]            | 2008                | Canada  | Grey literature   | C        | F                    | No           | -           | Older adults | -                                                                                                                                       | -                                                                                                                                                                            |

Tableau 1. The studies included in the scoping review

| Authors                                         | Year of publication | Country   | Study design      | Setting* | Types of incidents** | Participants |             |              |                                                                                                                                    |                                                                                           |
|-------------------------------------------------|---------------------|-----------|-------------------|----------|----------------------|--------------|-------------|--------------|------------------------------------------------------------------------------------------------------------------------------------|-------------------------------------------------------------------------------------------|
|                                                 |                     |           |                   |          |                      | CI***        | Sample size | Age          | Inclusion criteria                                                                                                                 | Exclusion criteria                                                                        |
| Owens P, Russo C, Spector W et al. [32]         | 2009                | USA       | Statistics        | ED       | F                    | No           | -           | ≥ 65         | -                                                                                                                                  | -                                                                                         |
| Centers for Disease Control and Prevention [35] | 2015                | USA       | Grey literature   | C        | F                    | No           | -           | Older adults | -                                                                                                                                  | -                                                                                         |
| Abrantes K et al. [34]                          | 2015                | Brazil    | Descriptive study | ED       | F+TA                 | No           | 190         | ≥ 65         | • Victims of some type of trauma (urban and rural);<br>• Served by the Mobile Emergency Service team.                              | -                                                                                         |
| Kara H, Bayir A, Ak A et al. [33]               | 2013                | Turkey    | Descriptive study | ED       | F+TA                 | No           | 568         | ≥ 65         | • Admitted to an Emergency Department of a tertiary care hospital.                                                                 | -                                                                                         |
| Public Health Agency of Canada [36]             | 2005                | Canada    | Grey literature   | C        | F                    | No           | -           | Older adults | -                                                                                                                                  | -                                                                                         |
| Lee V, Wong T, Lau C [37]                       | 1999                | Hong Kong | Descriptive study | ED       | F+TA+B               | No           | 100         | ≥ 65         | • History of accidental injury at home within one week.                                                                            | -                                                                                         |
| Yeo Y, Lee S, Lim C et al. [38]                 | 2009                | Singapore | Descriptive study | ED       | F+TA                 | No           | 720         | ≥ 65         | • Visiting the Emergency Department                                                                                                | • Immediate resuscitation;<br>• Mental illness or violent behavior.                       |
| Aschkenasy M, Rothenhaus T [39]                 | 2006                | USA       | Literature review | C        | F+TA                 | No           | -           | ≥ 65         | -                                                                                                                                  | -                                                                                         |
| Lee J, Sirois M, Moore L et al. [40]            | 2015                | Canada    | Descriptive study | ED       | F+TA                 | Yes          | 1.286       | ≥ 65         | • Independently perform the seven basic activities of daily living;<br>• Emergency Department patients;<br>• Discharged back home. | -                                                                                         |
| Amador S, Goodman C, King D et al. [41]         | 2014                | UK        | Descriptive study | C        | F                    | Yes          | 133         | ≥ 65         | • Documented diagnosis of dementia; or<br>• Validated measure of cognitive function impairment.                                    | • Admitted to hospital;<br>• From long-term care facilities;<br>• Unable to give consent. |
| Burns E [42]                                    | 2001                | USA       | Literature review | ED       | F                    | No           | -           | ≥ 65         | -                                                                                                                                  | • Lacked capacity to consent;<br>• A consultee could not be identified                    |
| Ziminski C, Phillips L, Woods D [43]            | 2012                | USA       | Descriptive study | ED       | F                    | Yes          | 18344       | ≥ 65         | -                                                                                                                                  | -                                                                                         |

Tableau 1. The studies included in the scoping review

| Authors                                                                                     | Year of publication | Country     | Study design      | Setting* | Types of incidents** | Participants |             |              |                                                                                                                                                                                                                      |                                                                                                                                                                                                         |
|---------------------------------------------------------------------------------------------|---------------------|-------------|-------------------|----------|----------------------|--------------|-------------|--------------|----------------------------------------------------------------------------------------------------------------------------------------------------------------------------------------------------------------------|---------------------------------------------------------------------------------------------------------------------------------------------------------------------------------------------------------|
|                                                                                             |                     |             |                   |          |                      | CI***        | Sample size | Age          | Inclusion criteria                                                                                                                                                                                                   | Exclusion criteria                                                                                                                                                                                      |
| Public Health Agency of Canada [44]                                                         | 2014                | Canada      | Grey literature   | C        | F                    | No           | -           | Older adults | -                                                                                                                                                                                                                    | -                                                                                                                                                                                                       |
| Whiteman C, Tillotson R, Denne N et al. [45]                                                | 2011                | USA         | Descriptive study | ED       | F+TA                 | Yes          | 6,151       | ≥ 40         | <ul style="list-style-type: none"> <li>• Dementia and non-dementia group;</li> <li>• Presented for a major trauma visit.</li> </ul>                                                                                  | -                                                                                                                                                                                                       |
| Nourhashé mi F, Andrieu S, Sastres N et al. [46]                                            | 2001                | France      | Descriptive study | ED       | F                    | Yes          | 118         | Older adults | <ul style="list-style-type: none"> <li>• Patients with Alzheimer' disease</li> </ul>                                                                                                                                 | -                                                                                                                                                                                                       |
| Voisin T, Sourdet S, Cantet C et al. [47]                                                   | 2009                | France      | Descriptive study | H        | F                    | Yes          | 686         | Older adults | <ul style="list-style-type: none"> <li>• Alzheimer's disease;</li> <li>• Mild to moderate disease;</li> <li>• Mini- Mental State Examination score between 10 and 26;</li> <li>• Living in the community.</li> </ul> | <ul style="list-style-type: none"> <li>• Severe Alzheimer's disease;</li> <li>• Institutionalized at baseline;</li> <li>• A concomitant disorder that could affect the short-term prognosis.</li> </ul> |
| Ministry of Health (British Columbia, Canada) [48]                                          | 2006                | Canada      | Grey literature   | C        | F                    | No           | -           | Older adults | -                                                                                                                                                                                                                    | <ul style="list-style-type: none"> <li>• Confusional syndromes or slight or moderate cognitive disorders.</li> </ul>                                                                                    |
| Kihlgren A, Wimo A, Mamhidir A [49]                                                         | 2014                | Sweden      | Descriptive study | C        | F                    | No           | 719         | ≥ 75         | <ul style="list-style-type: none"> <li>• Living permanently in a nursing home.</li> </ul>                                                                                                                            | -                                                                                                                                                                                                       |
| Pfortmueller C, Kunz M, Lindner G et al. [50]                                               | 2014                | Switzerland | Descriptive study | ED       | F                    | No           | 6357        | ≥16<br>≥75   | <ul style="list-style-type: none"> <li>• Admitted to the Emergency Department in relation to a fall.</li> </ul>                                                                                                      | -                                                                                                                                                                                                       |
| Timler D, Dworzyński M, Szarpak Ł et al. [51]                                               | 2015                | Poland      | Descriptive study | ED       | F                    | No           | 301         | ≥ 65         | <ul style="list-style-type: none"> <li>• Patients whose diagnoses were coded with ICD-10 (International Statistical Classification of Diseases) codes S00–S09 which pertain to injuries of the head.</li> </ul>      | -                                                                                                                                                                                                       |
| Ministry of health planning, Office of the Provincial Health Officer, British Columbia [52] | 2004                | Canada      | Grey literature   | C        | F                    | No           | 4066        | ≥ 65         | <ul style="list-style-type: none"> <li>• Treated and released in the Emergency Department</li> </ul>                                                                                                                 | -                                                                                                                                                                                                       |

Tableau 1. The studies included in the scoping review

| Authors                                             | Year of publication | Country   | Study design      | Setting* | Types of incidents** | Participants |             |              |                                                                                                                                                                                                                                                                   |                                                                                                                                         |
|-----------------------------------------------------|---------------------|-----------|-------------------|----------|----------------------|--------------|-------------|--------------|-------------------------------------------------------------------------------------------------------------------------------------------------------------------------------------------------------------------------------------------------------------------|-----------------------------------------------------------------------------------------------------------------------------------------|
|                                                     |                     |           |                   |          |                      | CI***        | Sample size | Age          | Inclusion criteria                                                                                                                                                                                                                                                | Exclusion criteria                                                                                                                      |
| Department of Health Promotion and Protection [53]  | 2007                | Canada    | Grey literature   | C        | F                    | No           | -           | Older adults | -                                                                                                                                                                                                                                                                 | • Admitted to hospital for further treatment of their injuries.                                                                         |
| Gyllencreutz L, Björnstig J, Rolfman E et al. [54]  | 2015                | Sweden    | Descriptive study | C        | F                    | No           | 216         | ≥ 65         | • Fall as a pedestrian in a public area.                                                                                                                                                                                                                          |                                                                                                                                         |
| Wilkins K, Park E [55]                              | 2004                | Canada    | Grey literature   | C        | F                    | No           | -           | Older adults | -                                                                                                                                                                                                                                                                 | -                                                                                                                                       |
| Douglas A, Letts L, Richardson J [56]               | 2011                | Canada    | Literature review | C        | F+B+SN+W             | Yes          | 16 sources  | ≥ 65         | -                                                                                                                                                                                                                                                                 | -                                                                                                                                       |
| Taylor M, Delbaere K, Lord S et al. [57]            | 2014                | Australia | Descriptive study | C        | F                    | Yes          | 174         | ≥ 60         | • Cognitive impairment;<br>• Living in the community or a low-level care facility.                                                                                                                                                                                |                                                                                                                                         |
| Paniagua M, Malphurs J, Phelan E [58]               | 2006                | USA       | Descriptive study | ED       | F                    | No           | 117         | ≥ 65         | • Presenting to the Emergency Department during the 2 months of observation after having fallen.                                                                                                                                                                  | • Recent stroke (within 18 months);<br>• Progressive neurodegenerative disorders (excluding dementia).                                  |
| Ouellet M, Sirois M, Beaulieu-Bonneau S et al. [59] | 2016                | Canada    | Descriptive study | ED       | F+TA                 | Yes          | 306         | ≥ 65         | • Independent in basic activities of daily living;<br>• Visit to the Emergency Department specifically for a minor traumatic injury;<br>• Discharged home within 48 hours.                                                                                        |                                                                                                                                         |
| Welmerink D, Longstreth W, Lyles M et al. [60]      | 2010                | USA       | Descriptive study | H        | F                    | Yes          | 5,356       | ≥ 65         | • Injury was the primary cause of hospitalization;<br>• Presence of an E-code for falling: E880–E886, E888;<br>• Available scores, for the baseline clinic visit, for 3MS (Modified Mini-Mental State Examination) and DSST (the Digit Symbol Substitution Test). |                                                                                                                                         |
| Taylor M, Lord S, Brodaty H et al. [61]             | 2017                | Australia | Empirical study   | C        | F                    | Yes          | 42          | ≥ 60         | • A clinical diagnosis of dementia;<br>• Living in the community;                                                                                                                                                                                                 | • Living in long-term care;<br>• Dementia or delirium or confusion at the visit;<br>• Admission to any ward;<br>• Inability to consent. |
| National Institute on Aging [62]                    | 2009                | USA       | Grey literature   | C        | F                    | No           | -           | Older adults | -                                                                                                                                                                                                                                                                 | -                                                                                                                                       |
| Beaudoin F, Merchant R, Clark M                     | 2016                | USA       | Empirical study   | ED       | SN                   | No           | 112         | ≥ 50         | • Taking opioids.                                                                                                                                                                                                                                                 |                                                                                                                                         |

Tableau 1. The studies included in the scoping review

| Authors                                        | Year of publication | Country  | Study design      | Setting* | Types of incidents** | Participants |             |              |                                                                                                                                                                                                                                                                                          |                                                                                                                                                                                                    |
|------------------------------------------------|---------------------|----------|-------------------|----------|----------------------|--------------|-------------|--------------|------------------------------------------------------------------------------------------------------------------------------------------------------------------------------------------------------------------------------------------------------------------------------------------|----------------------------------------------------------------------------------------------------------------------------------------------------------------------------------------------------|
|                                                |                     |          |                   |          |                      | CI***        | Sample size | Age          | Inclusion criteria                                                                                                                                                                                                                                                                       | Exclusion criteria                                                                                                                                                                                 |
| [63]                                           |                     |          |                   |          |                      |              |             |              |                                                                                                                                                                                                                                                                                          |                                                                                                                                                                                                    |
| Mahoney J, Shea T, Przybelski R et al. [64]    | 2007                | USA      | Empirical study   | C        | F                    | No           | 349         | ≥ 65         | <ul style="list-style-type: none"> <li>Independently living;</li> <li>History of 2 falls in the previous year; or 1 fall in the previous 2 years with injury or gait and balance problems.</li> </ul>                                                                                    | <ul style="list-style-type: none"> <li>Cognitive impairment.</li> </ul>                                                                                                                            |
| National Institute on Aging [65]               | 2002                | USA      | Grey literature   | C        | TA                   | Yes          | -           | Older adults | -                                                                                                                                                                                                                                                                                        | -                                                                                                                                                                                                  |
| Alden N, Rabbitts A, Yurt R [66]               | 2005                | USA      | Descriptive study | C        | B                    | Yes          | 36          | Older adults | <ul style="list-style-type: none"> <li>Documented pre-existing dementia;</li> <li>Suffered a burn injury.</li> </ul>                                                                                                                                                                     |                                                                                                                                                                                                    |
| Ehrlich A, Kathpalia S, Boyarsky Y et al. [67] | 2005                | USA      | Descriptive study | ED       | B                    | No           | 77          | ≥ 65         | <ul style="list-style-type: none"> <li>Treated in the Emergency Department for a burn diagnosis;</li> <li>Subsequently discharged home.</li> </ul>                                                                                                                                       |                                                                                                                                                                                                    |
| Lester P, Kohen I [69]                         | 2008                | USA      | Author's opinion  | C        | B                    | No           | -           | Older adults | -                                                                                                                                                                                                                                                                                        | -                                                                                                                                                                                                  |
| Lowton et al. [68]                             | 2010                | UK       | Descriptive study | C        | F+B                  | No           | -           | ≥ 60         | <ul style="list-style-type: none"> <li>Living in private or sheltered housing via two routes:               <ol style="list-style-type: none"> <li>those in contact for the purposes of receiving a Home Fire Safety Visit</li> <li>those attending Falls clinics</li> </ol> </li> </ul> | <ul style="list-style-type: none"> <li>Hospital admission;</li> <li>Transfer to a burn center;</li> <li>Elopement from the Emergency Department;</li> <li>Chemical or non-thermal burn.</li> </ul> |
| Elder A, Squires T, Busuttill A [70]           | 1996                | Scotland | Descriptive study | C        | B                    | No           | 1096        | ≥ 75         | <ul style="list-style-type: none"> <li>Died in household fires.</li> </ul>                                                                                                                                                                                                               |                                                                                                                                                                                                    |
| Tierney M, Snow W, Charles J et al. [71]       | 2007                | Canada   | Descriptive study | C        | SN                   | Yes          | 139         | ≥ 65         | <ul style="list-style-type: none"> <li>Cognitive impairment;</li> <li>Living alone.</li> </ul>                                                                                                                                                                                           |                                                                                                                                                                                                    |
| Charles J, Naglie G, Lee J et al. [72]         | 2015                | Canada   | Descriptive study | C        | SN                   | Yes          | 224         | ≥ 65         | <ul style="list-style-type: none"> <li>Cognitive impairment (≤130 on the Dementia Rating Scale);</li> <li>Living alone;</li> <li>Having a PCP (Primary care physician).</li> </ul>                                                                                                       | <ul style="list-style-type: none"> <li>Living in a communal setting;</li> <li>History of bipolar disorder or schizophrenia.</li> </ul>                                                             |
| Barat I, Andreasen F, Damsgaard E [73]         | 2001                | Denmark  | Descriptive study | C        | SN                   | Yes          | 348         | ≥ 75         | -                                                                                                                                                                                                                                                                                        | -                                                                                                                                                                                                  |

Tableau 1. The studies included in the scoping review

| Authors                                        | Year of publication | Country                                         | Study design      | Setting* | Types of incidents** | Participants |             |              |                                                                                               |                    |
|------------------------------------------------|---------------------|-------------------------------------------------|-------------------|----------|----------------------|--------------|-------------|--------------|-----------------------------------------------------------------------------------------------|--------------------|
|                                                |                     |                                                 |                   |          |                      | CI***        | Sample size | Age          | Inclusion criteria                                                                            | Exclusion criteria |
| Canadian Institute for Health Information [74] | 2016                | Canada                                          | Grey literature   | ED       | SN                   | No           | -           | ≥ 65         | -                                                                                             | -                  |
| Tierney M, Charles J, Jaglal S et al.[75]      | 2001                | Canada                                          | Descriptive study | C        | SN                   | Yes          | 139         | ≥ 65         | • Suspected of having cognitive impairment;<br>• Living alone.                                | -                  |
| Rowe M, Feinglass N, Wiss M [76]               | 2004                | USA                                             | Literature review | C        | W                    | Yes          | -           | Older adults | -                                                                                             | -                  |
| Dalsania P [79]                                | 2006                | USA                                             | Grey literature   | C        | TA                   | Yes          | -           | Older adults | -                                                                                             | -                  |
| Booth V, Logan P, Harwood R et al. [82]        | 2015                | UK                                              | Literature review | C        | F                    | Yes          | 7 sources   | Older adults | -                                                                                             | -                  |
| Allred D, Raynor D, Hughes C et al. [88]       | 2013                | Australia, Canada, Netherlands, Sweden, UK, USA | Literature review | C        | SN                   | No           | 7653        | ≥ 65         | • Living in institutionalized care facilities.                                                | -                  |
| Public Health Agency of Canada [89]            | 2009                | Canada                                          | Grey literature   | C        | TA                   | No           | -           | Older adults | -                                                                                             | -                  |
| Fuller G [90]                                  | 2000                | USA                                             | Author's opinion  | C        | F                    | No           | -           | Older adults | -                                                                                             | -                  |
| Al-Aama T [91]                                 | 2011                | USA                                             | Author's opinion  | C        | F                    | No           | -           | Older adults | -                                                                                             | -                  |
| Rapp K, Lamb S, Büchele G et al. [92]          | 2008                | Germany                                         | Descriptive study | C        | F                    | Yes          | 365         | ≥ 60         | • Living in a nursing homes;<br>• >40% reported symptoms of low mood or cognitive impairment. | -                  |
| Carpenter C, Avidan M, Wildes T et al. [93]    | 2014                | USA                                             | Literature review | ED       | F                    | No           | 3 sources   | ≥ 65         | -                                                                                             | -                  |
| Taylor M, Delbaere K, Close J et al. [94]      | 2012                | Australia                                       | Literature review | C        | F                    | Yes          | -           | Older adults | -                                                                                             | -                  |



Tableau 1. The studies included in the scoping review

| Authors                                            | Year of publication | Country | Study design    | Setting* | Types of incidents** | Participants |             |              |                                        |                    |
|----------------------------------------------------|---------------------|---------|-----------------|----------|----------------------|--------------|-------------|--------------|----------------------------------------|--------------------|
|                                                    |                     |         |                 |          |                      | CI***        | Sample size | Age          | Inclusion criteria                     | Exclusion criteria |
| Canadian Institute for Health Information [95]     | 2014                | Canada  | Grey literature | ED       | F                    | No           | 1,537,239   | ≥ 65         | • Living in a long-term care facility. |                    |
| Institut national de santé publique du Québec [96] | 2017                | Canada  | Grey literature | C        | F                    | No           | -           | Older adults | -                                      | -                  |

\*Setting: C = Community; ED = Emergency Department; H = Hospital;  
 \*\*Types of incidents are: B = burns; F = falls; SN = harm due to self-neglect; TA = traffic accidents; W = harm due to wandering;  
 \*\*\*CI = did the study include participants with cognitive impairment?

Peer review only

#### **Avoidable incidents:**

Falls: Not surprisingly, falls emerged as the main type of incident among older adults, whether associated with an ED presentation and use of medical services, or not (30-80%),[26–31] and as the main cause of injury (e.g. fractures)[32] in this population.[31,33–35] Falls were also the main cause of hospitalizations (62-80%) and ED visits (59-85%) following an incident.[8,11,29–31,33,34,36–49] When comparing older adults, with and without cognitive impairment, the cognitively impaired were reported to fall more often (60-80%) than the non-impaired (30%),[26–31] as well as being hospitalized more often due to falls (around 19%) than the general senior population (14% of total hospitalizations).[46–48] Nonetheless, the difference between older adults, with and without cognitive impairment, in terms of ED visits following a fall compared to the total number of visits, is non-significant (11.1% vs 10.4% respectively).[43] Furthermore, seniors with cognitive impairment sustained more severe injuries, and were 3 times more at risk of fractures than those without cognitive impairment.[27]

In terms of circumstances, no difference was documented between the two sub-populations. Falls mainly occurred at home or nearby (47-74%).[29,31,36,38,41,44,50–53] The toilet was the most common site (29%), followed by the living room (18%) and the kitchen (14%).[37] Falls happened mostly during the day.[34,49,54] Ice and winter conditions were also associated with falls.[55]

Finally, many studies outlined the link between falls and the following factors: Cognitive impairment,[28,36,43,45,56–60] wandering,[56] poor physical condition,[28,29,33,36,37,57,61] medical conditions,[28,29,33,36–38,50,51,58] polymedication, and some types of medication,[28,34,57,58,62,63] living alone,[36,64] and hazards in the environment.[28,37,54]

Transport accidents : Traffic accidents were the second cause of ED visits (14-22.6%) and hospitalizations following an incident.[9,11,30,33,34,39] When comparing older adults, with and without cognitive impairment, those with cognitive impairment were significantly less hospitalized (3.5%) than those without (35% of total hospitalizations following an incident).[45]

In terms of circumstances, no difference pertaining to cognitive impairment was documented. Accidents mainly occurred during the day, on weekends (Friday to Sunday) and between May and August.[34] Meanwhile, approximately 60% of hospitalized older adults with cognitive impairment were driving at the time of the accident.[45]

1  
2  
3 Several factors were linked to a higher risk of traffic accidents, including cognitive  
4 impairment,[30,65] reckless behavior [65] and deteriorating physical condition.[30]  
5  
6

7 Burns: Burns emerged as the third cause of ED visits following an incident (2-3%),[9,37] and the  
8 third cause of home injuries.[56] Burns in cognitively impaired seniors were reported to cause more  
9 morbidity and mortality (25%) than in the general senior population (13.8%).[56,66] Differences were  
10 also noted regarding major burn mechanisms. The main major burn mechanism among cognitively  
11 impaired seniors was scalding (44.4%), followed by flame burns (36.1%) and contact (18%),[66]  
12 while flames or flash were the most common in the general senior population (51-81%), followed by  
13 scalding (11-30%) and contact (5-7%).[67]  
14  
15  
16  
17  
18  
19

20 In both sub-populations, most burns occurred at home.[66,67] Older adults with cognitive impairment  
21 mainly suffered burns while bathing (31%) and cooking (16%).[66] On the other hand, 27 to 40% of  
22 major burns and 68% of minor burns in older adults without cognitive impairment occurred in the  
23 kitchen.[67]  
24  
25  
26  
27

28 Many factors were associated with burns, such as physical condition,[67–69] cognitive  
29 impairment,[56,68,69] polymedication,[68] reckless behaviors,[67,69] and living alone.[68,70]  
30  
31

32 Harm due to self-neglect: In older adults with cognitive impairment, harm due to self-neglect was  
33 reported as an avoidable incident, with an incidence of 11 to 21%, of which 70% needed urgent  
34 care.[13,71,72] Major harm due to self-neglect included: failure to eat/drink, failure to follow  
35 instructions (treatment, medication or technical aids), failure to report a medical condition, and failure  
36 to maintain personal hygiene.[13,71,72] Furthermore, older adults with cognitive impairment were  
37 more at risk of noncompliance to medication than those without cognitive impairment.[56,73,74]  
38 Finally, harm due to self-neglect can be influenced by poly-medication [63,73] and cognitive  
39 impairment.[71,72,75]  
40  
41  
42  
43  
44  
45

46 Harm due to wandering: Older adults with cognitive impairment were more at risk to get lost and  
47 suffer from consequent harm (e.g. frostbite), regardless of their living arrangements, especially when  
48 left unattended. Around 13% were in an outing that they regularly took alone.[76]  
49  
50  
51  
52  
53  
54  
55  
56  
57  
58  
59  
60

### Preventive measures:

Preventive measures identified through this scoping review are displayed in Table 2a (individual interventions) and Table 2b (environmental interventions). Most of them were applied to the general senior population, and not to the older adults with cognitive impairment. Identified prevention programs could be implemented in the person's micro-environment (at home) or macro-environment (community).

Measures to prevent falls were the most common theme. Home assessments and adaptations ( $n = 16$ ), as well as physical exercise, (e.g. strength and balance exercises) ( $n = 15$ ) were the most frequently described interventions, followed by medication review ( $n = 12$ ), use of assistive devices ( $n = 11$ ) and improved nutrition (e.g. food supplements) ( $n = 10$ ). The second major theme pertained to preventive measures for traffic accidents ( $n = 6$ ). Interventions included cognitive and physical screening in older adults by the physician, as well as environmental interventions, including government measures (e.g. regulations and preventive campaigns). Interventions to prevent burns were also environmental, such as home assessment and modifications targeting high-risk populations. In terms of self-neglect, interventions focused on noncompliance (e.g. walking aid, medication) and environmental interventions (surveillance and home visits targeting high-risk populations). Finally, preventive measures to reduce wandering mainly encompassed community involvement, (e.g. neighborhood and family), and special programs and plans to prevent or rapidly intervene after the incident.

**Table 2a.** Individual-level interventions organized by types of incidents

| Individual-level interventions |                                                                                                                                                                                                                                                                                                                                                                                                                                                       |                                                                                                                                                                                                        |                                                                                                                                                                                  |
|--------------------------------|-------------------------------------------------------------------------------------------------------------------------------------------------------------------------------------------------------------------------------------------------------------------------------------------------------------------------------------------------------------------------------------------------------------------------------------------------------|--------------------------------------------------------------------------------------------------------------------------------------------------------------------------------------------------------|----------------------------------------------------------------------------------------------------------------------------------------------------------------------------------|
|                                | Physical/medical                                                                                                                                                                                                                                                                                                                                                                                                                                      | Cognitive                                                                                                                                                                                              | Assistive devices                                                                                                                                                                |
| Falls                          | <ul style="list-style-type: none"> <li>- Medication review and modification [27,28,35,36,44,52,53,79,90,91,94,96]</li> <li>Balance and strength exercises [27–29,35,36,53,57,61,62,79,82,90,92,94,96]</li> <li>- Better nutrition [29] and supplements [28,35,44,52,53,57,91,94,96]</li> <li>- Better sleep [62]</li> <li>- Management of chronic and acute conditions [27,53,79,94] including visual correction [28,35,44,53,79,91,94,96]</li> </ul> | <ul style="list-style-type: none"> <li>- Education on risks and prevention measures [27,37,52,53,79,92,95]</li> <li>- Education on dementia [46]</li> <li>- Fear of falling assessment [53]</li> </ul> | <ul style="list-style-type: none"> <li>- Mobility-aid devices [36,79,96]</li> <li>- Anti-slip shoes and devices [28,29,31,54,62,91]</li> <li>- Hip protectors [52–54]</li> </ul> |
| Traffic accidents              | <ul style="list-style-type: none"> <li>- Recommendations to restrict or to stop driving [79]</li> <li>- Regular medical examination [38,65]</li> </ul>                                                                                                                                                                                                                                                                                                | <ul style="list-style-type: none"> <li>- Safety education programs for seniors [30]</li> </ul>                                                                                                         |                                                                                                                                                                                  |
| Burns                          |                                                                                                                                                                                                                                                                                                                                                                                                                                                       | <ul style="list-style-type: none"> <li>- High-risk behavior assessment [67]</li> </ul>                                                                                                                 |                                                                                                                                                                                  |
| Harm due to self-neglect       | <ul style="list-style-type: none"> <li>- Medication review and modification [73,75,79,88]</li> </ul>                                                                                                                                                                                                                                                                                                                                                  | <ul style="list-style-type: none"> <li>- Education of patient on treatment and non-adherence prevention measures [73]</li> </ul>                                                                       | <ul style="list-style-type: none"> <li>- Compliance aids (pill organizers, medication schemes) [73,75]</li> </ul>                                                                |
| Harm due to wandering          |                                                                                                                                                                                                                                                                                                                                                                                                                                                       |                                                                                                                                                                                                        | <ul style="list-style-type: none"> <li>- Identification bracelet [79]</li> </ul>                                                                                                 |

**Table 2b.** Environmental interventions organized by types of incidents

| Environmental interventions |                                                                                                                                                                                                          |                                                                                                                                                                                                                                          |                                                                                                                                                                                                                                                                                                                                                                                               |
|-----------------------------|----------------------------------------------------------------------------------------------------------------------------------------------------------------------------------------------------------|------------------------------------------------------------------------------------------------------------------------------------------------------------------------------------------------------------------------------------------|-----------------------------------------------------------------------------------------------------------------------------------------------------------------------------------------------------------------------------------------------------------------------------------------------------------------------------------------------------------------------------------------------|
|                             | Physical                                                                                                                                                                                                 | Social                                                                                                                                                                                                                                   | Organizational                                                                                                                                                                                                                                                                                                                                                                                |
| Falls                       | <ul style="list-style-type: none"> <li>- Home assessment and adaptation [29,31,35,36,44,48,53,62,68,79,90–92,96]</li> <li>- Better roads and sidewalk maintenance, especially in winter [54]</li> </ul>  | <ul style="list-style-type: none"> <li>- Education of caregivers and staff on risks and prevention measures [27,37,52,53,79,92,95] even entire communities [53]</li> <li>- Education of caregivers and staff on dementia [46]</li> </ul> | <ul style="list-style-type: none"> <li>- Improvement of building code and regulations [36]</li> <li>- Smartphone apps to report changes in the environment or surface conditions [54]</li> <li>- A public phone line to report falls and fall risks in the environment [36]</li> <li>- Multidisciplinary teams [96] and multifactorial interventions (e.g. PROFET*, MPI**) [93,96]</li> </ul> |
| Traffic accidents           | <ul style="list-style-type: none"> <li>- Elderly-friendly environment / public amenities [30,38]</li> <li>- Increased stoplight and pedestrian crossing times, modified roadway markings [30]</li> </ul> | <ul style="list-style-type: none"> <li>- Education of staff and caregivers regarding risks, monitoring and supervision [65,79,89]</li> </ul>                                                                                             | <ul style="list-style-type: none"> <li>- Road safety campaigns [38,89]</li> <li>- Stricter law enforcement related to jay-walking [30]</li> <li>- Promoting alternatives to driving [38,52,65,79,89]</li> </ul>                                                                                                                                                                               |
| Burns                       | <ul style="list-style-type: none"> <li>- Comprehensive home safety evaluation and modifications [29,67]</li> <li>- Home fire safety visits targeting vulnerable populations [68]</li> </ul>              | <ul style="list-style-type: none"> <li>- Education for caregivers on dementia and on burn safety measures, including adequate assistance and supervision [66]</li> </ul>                                                                 | <ul style="list-style-type: none"> <li>- Nursing home policies limiting smoking to under supervision and in determined locations [69]</li> <li>- Smoking cessation programs (social/emotional support, non-smoking related activities, pharmacological options) [69]</li> </ul>                                                                                                               |
| Harm due to self-neglect    |                                                                                                                                                                                                          | <ul style="list-style-type: none"> <li>- Frequent visits by staff or family members trained to identify problems associated with negligence [71]</li> </ul>                                                                              | <ul style="list-style-type: none"> <li>- Case management for high-risk population [71]</li> </ul>                                                                                                                                                                                                                                                                                             |
| Harm due to wandering       |                                                                                                                                                                                                          | <ul style="list-style-type: none"> <li>- Education of informal and formal caregivers [76]</li> <li>- Strategies including neighbors, formal-informal caregivers and law enforcement [76,79]</li> </ul>                                   | <ul style="list-style-type: none"> <li>- Special programs (e.g. Safe Return) that help rapidly locate and return lost individuals [76]</li> <li>- Safety plans in formal care settings that prevent wandering [76]</li> </ul>                                                                                                                                                                 |

\*PROFET= Prevention of falls in the elderly trial; \*\*MPI=Multifactorial personalized Intervention

## DISCUSSION

In this scoping review, we aimed to examine literature about “avoidable” incidents leading older adults with cognitive impairment to ED presentations, in order to identify preventive measures that could be implemented to reduce such incidents. Five main types of incidents emerged from literature: falls, traffic accidents, burns, harm due to self-neglect, and harm due to wandering. Of those, most were more frequent in cognitively impaired seniors, as they may present judgment errors and unsafe behaviors.[12,13] The only exceptions were traffic accidents, which is not surprising, considering the lower number of cognitively impaired drivers, compared to older drivers without such impairment,[77,78] and falls, for which the difference of prevalence between the two sub-populations was non-significant. Nevertheless, when driving, cognitively impaired adults were at increased risk of experiencing an incident (whether or not associated with an ED presentation or hospitalization) than those without such an impairment [45,65,79] as they may be less fit for driving.[80,81] Moreover, falls emerged as the main type of incident for both sub-populations. This result is congruent with its actual importance in the scientific literature (73% of the sources reported in this scoping review), as well as its predominance in deployed preventive measures. In fact, in Canada, more than 50 community-based programs were developed and deployed with older adults in 2001 to prevent falls,[16] which seem far more numerous than programs for other types of incidents.

One of the main objectives of this scoping review was to document the circumstances under which the incidents occurred. Unfortunately, this description remains limited and focused only on the three main types of incident (falls, traffic accidents, and burns). Consequently, little is known about the activities carried out at the time of the incident. As this information could facilitate the development of preventive measures according to risk factors (e.g. reduce the risk of burns at bath time, adapt preventive measures according to the circumstances of traffic accidents), future studies in the ED should further detail the circumstances of incidents in seniors. Moreover, one of the main limitations of our study was the difficulty to differentiate harm due to incidents from other medical causes (e.g. infections, side effects to medication), as some medical conditions may be caused by “avoidable” incidents (e.g. bad hygiene caused by self-neglect can lead to infections; noncompliance to medication can lead to a variety of sides effects).[13,75] For this scoping review, we decided to exclude all medical conditions with unknown or unclear causes. Consequently, the prevalence of “avoidable” incidents, such as harm due to self-neglect and wandering, may be underestimated in the

1  
2  
3 cognitively-impaired population. In conclusion, better identification of these incidents among  
4 cognitively impaired seniors in the ED, as well as the circumstances under which they occurred, may  
5 help understand the cause of injuries and reduce the risk of further ones, as preventive measures may  
6 be put in place accordingly.  
7  
8  
9

10  
11 In total, 43 preventive measures were identified through this scoping review. Preventive measures  
12 mainly focused on environmental modifications (e.g. home and community physical environments,  
13 education to caregivers), modification of the person's habits (e.g. nutrition, medication, use of  
14 technical aids), government measures (e.g. safety programs with firefighters and the authorities,  
15 building regulations) and the involvement of a multidisciplinary team at the ED (e.g. pharmacist,  
16 occupational therapist, doctor). These interventions may represent a good starting point for Public  
17 Health Authorities to implement safe and healthy environments. Not surprisingly, most interventions  
18 aimed to reduce falls among older adults ( $n = 19$ ), regardless of their cognitive level. Furthermore,  
19 only a few preventive measures were tested and evaluated among the cognitively impaired  
20 population, and results were often poorer than those obtained with older adults without cognitive  
21 impairment.[26,27,82] Potential preventive measures to reduce other types of incidents were also  
22 identified (e.g. home environment evaluation and modifications such as a water regulator to reduce  
23 the risk of burns, the recommendation to cease driving, education and supervision by caregivers to  
24 reduce self-negligence)[29,67,71,79] in older adults with cognitive impairment, but few were  
25 specifically tested in this sub-population. As these incidents represented the first, second and third  
26 causes of ED presentation for this population, further studies should focus on the development and  
27 implementation of new preventive measures to reduce these incidents. This knowledge could then be  
28 used by stakeholders to make an informed decision to promote public health policies (e.g. home and  
29 road safety programs), healthcare services (e.g. workshops focussing on the prevention of avoidable  
30 incidents) and future research (orienting primary research and systematic review) in order to improve  
31 the well-being of this population and reduce avoidable costs associated with ED presentations.  
32  
33  
34  
35  
36  
37  
38  
39  
40  
41  
42  
43  
44  
45  
46

47  
48 This study highlighted the need for primary studies, in the specific context of ED and for sub-groups  
49 of older adults with cognitive impairment. Considering the lack of knowledge, future primary  
50 research should focus on the screening and documentation of the circumstances and cognitive abilities  
51 of older adults presenting to the ED. A systematic screening of the cognitive abilities and the  
52 circumstances around ED presentation through the use of a short screening tool, such as the Six-Item  
53  
54  
55  
56  
57  
58  
59  
60



1  
2  
3 Screener (SIS),[83,84] or medical chart review, could help identify older adults with cognitive  
4 impairment. Implication of different actors in the screening process may also improve our  
5 understanding of “avoidable” incidents and of case management. In Ontario (Canada), a pilot study  
6 was performed with paramedics to develop a screening tool to help identify the circumstances  
7 surrounding the incident leading to ED presentation, as well as associated risk factors in the person’s  
8 environment.[85] Results were positive, and further studies are ongoing. Finally, coroner’s files could  
9 be used to better understand the circumstances surrounding “avoidable” incidents leading to death,  
10 which are the more severe cases. In summary, further primary studies are required, and should  
11 involve many actors (e.g. occupational therapists, pharmacists) in the ED, considering the complexity  
12 and multifactorial nature of avoidable incidents.  
13  
14  
15  
16  
17  
18  
19  
20

21 Using a rigorous method, this scoping review provided the advantage of exploring a variety of  
22 sources from a multitude of databases (e.g. statistics, national and provincial health organizations,  
23 scientific databases). Covalidation of sources inclusion, data charting and analyses were also  
24 completed to ensure valid interpretation of results. However, as previously mentioned, sources and  
25 causes of ED presentation and hospitalizations that may be associated with “avoidable” incidents (e.g.  
26 infections, medication side effects) were excluded from this scoping review. Prevalence of incidents  
27 for older adults, with and without cognitive impairment, may have been consequently underestimated.  
28 Considering the lack of knowledge concerning ED presentation and avoidable incidents, data and  
29 sources focussing on hospital medical services and mortality were included in this scoping review,  
30 and may affect our conclusions. Inclusion of these sources allowed us to explore the severity of  
31 incidents, as well as more severe cases, an aspect that is rarely discussed in literature. Furthermore,  
32 distinction between older adults, with and without cognitive impairment, may vary between included  
33 sources, as cognitive abilities were not always assessed. Therefore, some sources may have  
34 categorized older adults with mild cognitive impairment or who are undiagnosed, as older adults  
35 without cognitive impairment. Finally, the definition of ED presentation and the applicability of the  
36 study results may vary in different countries. This should be considered before using this knowledge  
37 in the Canadian healthcare system. Nonetheless, this study provides a better understanding of  
38 “avoidable” incidents leading older adults with cognitive impairment to ED presentation,  
39 demonstrates the need for primary research, and is a good starting point for the Regional Public  
40 Health Department to identify preventive measures to implement with this population.  
41  
42  
43  
44  
45  
46  
47  
48  
49  
50  
51  
52  
53  
54  
55  
56  
57  
58  
59  
60

## CONCLUSION

This scoping review provided a detailed and comprehensive perspective of current knowledge regarding five types of “avoidable” incidents (falls, traffic accidents, burns, harm due to self-neglect, harm due to wandering) leading older adults, with and without cognitive impairment, to ED presentation, and the preventive measures that may be implemented to reduce these incidents. According to this review, little is known about the circumstances in which the incidents occurred, and some (e.g. frostbite, dehydration) were not specifically discussed. Furthermore, although many potential preventive measures were identified, only few were tested with older cognitively impaired adults. As a result, further studies are needed to test and implement preventive measures with this population, and consequently, to reduce further negative outcomes.

## AUTHOR CONTRIBUTIONS

MGR and BH completed the literature review and the data extraction, assisted by two collaborators (Stéphanie Stocco and Annie-Claude Lemieux-Courchesne) and participated in the study design. MGR and BH analyzed and interpreted the results. MGR wrote the first draft of the manuscript with the help of BH. VP, NV, ME, MJS, and MG contributed to the study concept and design. Two collaborators (Kathy Rose and Francis Lacasse) were involved in the selection of relevant keywords and databases. The article was critically reviewed by NV, ME, MG, MJS and VP.

## COMPETING INTERESTS

None declared.

## FUNDING STATEMENT

This work was supported by the Fonds de recherche du Québec (FRQ-S, no 34546) and the Faculty of Medicine and Health Sciences of the University of Sherbrooke. (UBR-706230).

## DATA SHARING STATEMENT

Not applicable.

## REFERENCES

- 1 Canadian Institute for Health Information. Health Care in Canada 2011: A focus on Seniors and Aging. Ottawa: 2011. [https://secure.cihi.ca/free\\_products/HCIC\\_2011\\_seniors\\_report\\_en.pdf](https://secure.cihi.ca/free_products/HCIC_2011_seniors_report_en.pdf)
- 2 Sampson EL, Blanchard MR, Jones L, *et al.* Dementia in the acute hospital: prospective cohort study of prevalence and mortality. *Br J Psychiatry* 2009;**195**:61 LP-66.
- 3 Gray LC, Peel NM, Costa AP, *et al.* Profiles of Older Patients in the Emergency Department: Findings From the interRAI Multinational Emergency Department Study. *Ann Emerg Med* 2017;**62**:467–74. doi:10.1016/j.annemergmed.2013.05.008
- 4 Launay, C, Haubois, G, Hureaux-Huynh, R *et al.* [Older adults and emergency department: who is at risk of hospitalisation?] [Article in French]. *Geriatr Psychol Neuropsychiatr Vieil*
- 5 Clevenger CK, Chu TA, Yang Z, *et al.* Clinical Care of Persons with Dementia in the Emergency Department: A Review of the Literature and Agenda for Research. *J Am Geriatr Soc* 2012;**60**:1742–8. doi:10.1111/j.1532-5415.2012.04108.x
- 6 Sirois M-J, Émond M, Ouellet M-C, *et al.* Cumulative Incidence of Functional Decline After Minor Injuries in Previously Independent Older Canadian Individuals in the Emergency Department. *J Am Geriatr Soc* 2013;**61**:1661–8. doi:10.1111/jgs.12482
- 7 World Health Organisation. International Classification of Diseases (ICD-10), 2016. <http://apps.who.int/classifications/icd10/browse/2016/en#/T66-T78>.
- 8 Albert M, McCaig LF, Ashman JJ. Emergency department visits by persons aged 65 and over: United States, 2009-2010. Hyattsville: 2013. <http://www.ncbi.nlm.nih.gov/pubmed/24152709>
- 9 Ng W, Fujishima S, Suzuki M, *et al.* Characteristics of elderly patients presenting to the emergency department with injury. *Keio J Med* 2002;**51**:11–6. <http://www.ncbi.nlm.nih.gov/pubmed/11951373>
- 10 Canadian Institute for Health Information. Seniors' Use of Emergency Departments in Ontario. 2010. <https://secure.cihi.ca/estore/productFamily.htm?locale=en&pf=PFC1398&lang=en&media=0>
- 11 Ontario Injury Prevention Resource Centre. Injuries among Seniors in Ontario A Descriptive Analysis of Emergency Department and Hospitalization Data. 2007. [http://www.oninjuryresources.ca/downloads/publications/seniors\\_report.pdf](http://www.oninjuryresources.ca/downloads/publications/seniors_report.pdf)
- 12 Fischer BL, Gleason CE, Gangnon RE, *et al.* Declining cognition and falls: role of risky performance of everyday mobility activities. *Phys Ther* 2014;**94**:355–62. doi:10.2522/ptj.20130195
- 13 Tierney MC, Charles J, Naglie G, *et al.* Risk Factors for Harm in Cognitively Impaired Seniors Who Live Alone: A Prospective Study. *J Am Geriatr Soc* 2004;**52**:1435–41. doi:10.1111/j.0002-8614.2004.52404.x
- 14 Robitaille Y, Laforest S, Fournier M, *et al.* Moving Forward in Fall Prevention: An Intervention to Improve Balance Among Older Adults in Real-World Settings. *Am J Public Health* 2005;**95**:2049–56.

- 1  
2  
3 doi:10.2105/AJPH.2004.057612
- 4  
5 15 Nasvadi GE. Changes in self-reported driving behaviour following attendance at a mature driver  
6 education program. *Transp Res Part F Traffic Psychol Behav* 2007;**10**:358–69.  
7  
8 doi:http://dx.doi.org/10.1016/j.trf.2007.02.001
- 9  
10 16 Division of Aging and Seniors. An Inventory of Canadian Programs for the Prevention of Falls Among  
11 Seniors Living in the Community. Ottawa: 2001.
- 12  
13 17 Robitaille Y, Laforest S, Fournier M, *et al*. Moving Forward in Fall Prevention: An Intervention to  
14 Improve Balance Among Older Adults in Real-World Settings. *Am J Public Health* 2005;**95**:2049–56.  
15  
16 doi:10.2105/AJPH.2004.057612
- 17  
18 18 Nasvadi GE. Changes in self-reported driving behaviour following attendance at a mature driver  
19 education program. *Transp Res Part F Traffic Psychol Behav* 2007;**10**:358–69.  
20  
21 doi:http://dx.doi.org/10.1016/j.trf.2007.02.001
- 22  
23 19 Gouvernement du Québec. Programme nationale de santé publique 2015-2025. Québec: 2015.  
24  
25 http://publications.msss.gouv.qc.ca/msss/fichiers/2015/15-216-01W.pdf
- 26  
27 20 Levac D, Colquhoun H, O'Brien KK. Scoping studies: advancing the methodology. *Implement Sci*  
28  
29 2010;**5**:69. doi:10.1186/1748-5908-5-69
- 30  
31 21 Arksey H, O'Malley L. Scoping studies: towards a methodological framework. *Int J Soc Res Methodol*  
32  
33 2005;**8**:19–32. doi:10.1080/1364557032000119616
- 34  
35 22 Levac D, Colquhoun H, O'Brien KK. Scoping studies: advancing the methodology. *Implement Sci*  
36  
37 2010;**5**:69. doi:10.1186/1748-5908-5-69
- 38  
39 23 Arksey H, O'Malley L. Scoping studies: towards a methodological framework. *Int J Soc Res Methodol*  
40  
41 2005;**8**:19–32. doi:10.1080/1364557032000119616
- 42  
43 24 World Health Organisation. International Classification of Diseases (ICD-10), 2016.
- 44  
45 25 L'écuyer R. *Méthodologie de l'analyse développementale de contenu. Méthode GPS et concept de soi*.  
46  
47 Québec: : Presses de l'Université du Québec 1990.
- 48  
49 26 Shaw F., Bond J, Richardson D., *et al*. Multifactorial intervention after a fall in older people with  
50  
51 cognitive impairment and dementia presenting to the accident and emergency department: randomised  
52  
53 controlled trial. *BMJ* 2003;**326**:73–73. doi:10.1136/bmj.326.7380.73
- 54  
55 27 Shaw FE. Falls in Older People With Dementia. *Geriatr aging* 2003;**6**:37–40.
- 56  
57 28 Gagnon C, Lafrance M. Prévention des chutes auprès des personnes âgées vivant à domicile :  
58  
59 recommandations préliminaire à l'élaboration d'un guide de pratique clinique. 2011;:235.
- 60  
61 29 Public Health Agency of Canada. The Safe Living Guide—A Guide to Home Safety for Seniors.  
62  
63 2011.http://www.phac-aspc.gc.ca/seniors-aines/publications/public/injury-blessure/safelive-  
64  
65 securite/index-eng.php

- 1  
2  
3 30 Raina P, Torrance V, Lindsay J. *A review of the literature and an analysis of mortality and*  
4 *hospitalisation data to examine patterns of injuries among Canadian seniors*. 1997.  
5  
6 31 Public health agency of Canada. If You Fall or Witness a Fall, Do You Know What to Do?  
7 2008.[http://www.phac-aspc.gc.ca/seniors-aines/publications/public/injury-blessure/falls-chutes/index-](http://www.phac-aspc.gc.ca/seniors-aines/publications/public/injury-blessure/falls-chutes/index-fra.php)  
8 [fra.php](http://www.phac-aspc.gc.ca/seniors-aines/publications/public/injury-blessure/falls-chutes/index-fra.php)  
9  
10  
11 32 Owens PL, Russo CA, Spector W, *et al*. *Emergency Department Visits for Injurious Falls among the*  
12 *Elderly, 2006: Statistical Brief #80*. 2006. <http://www.ncbi.nlm.nih.gov/pubmed/21452495>  
13  
14 33 Kara H, Bayir A, Ak A, *et al*. Trauma in elderly patients evaluated in a hospital emergency department  
15 in Konya, Turkey: a retrospective study. *Clin Interv Aging* 2013;**17**. doi:10.2147/CIA.S56542  
16  
17 34 Marques de Abrantes KS, Nobre de Menezes T, Andrade Duarte de Farias M do C, *et al*. Trauma in  
18 elderly people attended by a mobile emergency service. *Int Arch Med* Published Online First: 2015.  
19 doi:10.3823/1679  
20  
21  
22 35 Centers for Disease Control and Prevention. Older Adult Falls: Get the Facts.  
23 2015.<http://www.cdc.gov/homeandrecreationalsafety/falls/adultfalls.html>  
24  
25 36 Public Health Agency of Canada. Report on seniors' falls in Canada. 2005.  
26 <http://www.publications.gc.ca/pub?id=9.649855&sl=0>  
27  
28 37 Lee VM, Wong TW, Lau CC. Home accidents in elderly patients presenting to an emergency  
29 department. *Accid Emerg Nurs* 1999;**7**:96–102.<http://www.ncbi.nlm.nih.gov/pubmed/10578721>  
30  
31 38 Yeo YYC, Lee SK, Lim CY, *et al*. A review of elderly injuries seen in a Singapore emergency  
32 department. *Singapore Med J* 2009;**50**:278–83.<http://www.ncbi.nlm.nih.gov/pubmed/19352571>  
33  
34 39 Aschkenasy MT, Rothenhaus TC. Trauma and falls in the elderly. *Emerg Med Clin North Am*  
35 2006;**24**:413–32, vii. doi:10.1016/j.emc.2006.01.005  
36  
37  
38 40 Lee J, Sirois M-J, Moore L, *et al*. Return to the ED and hospitalisation following minor injuries among  
39 older persons treated in the emergency department: predictors among independent seniors within 6  
40 months. *Age Ageing* 2015;**44**:624–9. doi:10.1093/ageing/afv054  
41  
42 41 Amador S, Goodman C, King D, *et al*. Emergency ambulance service involvement with residential care  
43 homes in the support of older people with dementia: an observational study. *BMC Geriatr* 2014;**14**:95.  
44 doi:10.1186/1471-2318-14-95  
45  
46  
47 42 Burns E. Older people in accidents and emergency departments. *Age Ageing* 2001;**30**:3–6.  
48  
49 43 Ziminski CE, Phillips LR, Woods DL. Raising the index of suspicion for elder abuse: cognitive  
50 impairment, falls, and injury patterns in the emergency department. *Geriatr Nurs* 2012;**33**:105–12.  
51 doi:10.1016/j.gerinurse.2011.12.003  
52  
53 44 Public Health Agency of Canada. Seniors' Falls in Canada: Second Report. 2014. [http://www.phac-](http://www.phac-aspc.gc.ca/seniors-aines/publications/public/injury-blessure/seniors_falls-chutes_aines/index-eng.php)  
54 [aspc.gc.ca/seniors-aines/publications/public/injury-blessure/seniors\\_falls-chutes\\_aines/index-eng.php](http://www.phac-aspc.gc.ca/seniors-aines/publications/public/injury-blessure/seniors_falls-chutes_aines/index-eng.php)  
55  
56  
57  
58  
59

- 1  
2  
3 45 Whiteman C, Tillotson R, Denne N, *et al.* Major trauma in West Virginia dementia patients injury  
4 patterns, discharge dispositions and implications for treatment and injury prevention. *W V Med J*  
5 2011;**107**:48–52. <http://www.ncbi.nlm.nih.gov/pubmed/21702416>  
6  
7  
8 46 Nourhashémi F, Andrieu S, Sastres N, *et al.* Descriptive analysis of emergency hospital admissions of  
9 patients with Alzheimer disease. *Alzheimer Dis Assoc Disord* 2001;**15**:21–5.  
10  
11 47 Voisin T, Sourdet S, Cantet C, *et al.* Descriptive analysis of hospitalizations of patients with  
12 Alzheimer’s disease: a two-year prospective study of 686 patients from the REAL.FR study. *J Nutr*  
13 *Health Aging* 2009;**13**:890–2. doi:10.1007/s12603-009-0247-y  
14  
15 48 Ministry of health of B.C. Canada. The Evolution of Seniors’ Falls Prevention in British Columbia;  
16 Working strategically and collectively to reduce the burden and impact of falls and fall-related injury  
17 among seniors. 2006. [http://www.health.gov.bc.ca/library/publications/year/2006/falls\\_report.pdf](http://www.health.gov.bc.ca/library/publications/year/2006/falls_report.pdf)  
18  
19 49 Kihlgren A, Wimo A, Mamhidir A-G. Older patients referred by community nurses to emergency  
20 departments--a descriptive cross-sectional follow-up study in a Swedish context. *Scand J Caring Sci*  
21 2014;**28**:97–103. doi:10.1111/scs.12044  
22  
23 50 Pfortmueller CA, Kunz M, Lindner G, *et al.* Fall-Related Emergency Department Admission: Fall  
24 Environment and Settings and Related Injury Patterns in 6357 Patients with Special Emphasis on the  
25 Elderly. *Sci World J* 2014;**2014**:1–6. doi:10.1155/2014/256519  
26  
27 51 Timler D, Dworzyński MJ, Szarpak Ł, *et al.* Head Trauma in Elderly Patients: Mechanisms of Injuries  
28 and CT Findings. *Adv Clin Exp Med* 2015;**24**:1045–50. <http://www.ncbi.nlm.nih.gov/pubmed/26771978>  
29  
30 52 Ministry of health planning Office of the Provincial Health Officer British Columbia. Prevention of  
31 falls and injuries among the elderly : a special report from the Office of the Provincial Health Planning.  
32 2004. <http://www.health.gov.bc.ca/library/publications/year/2004/falls.pdf>  
33  
34 53 Department of Health Promotion and Protection. Preventing Fall-Related Injuries Among Older Nova  
35 Scotians : A Strategic Framework. 2007.  
36  
37 54 Gyllencreutz L, Björnstig J, Rolfsman E, *et al.* Outdoor pedestrian fall-related injuries among Swedish  
38 senior citizens - injuries and preventive strategies. *Scand J Caring Sci* 2015;**29**:225–33.  
39  
40  
41  
42  
43  
44  
45  
46 55 Wilkins K, Park E. Injuries. *Heal Reports, Stat Canada, Cat 82-003* 2004;**15**:43–8.  
47  
48 56 Douglas A, Letts L, Richardson J. A systematic review of accidental injury from fire, wandering and  
49 medication self-administration errors for older adults with and without dementia. *Arch Gerontol Geriatr*  
50 2011;**52**:e1–10. doi:10.1016/j.archger.2010.02.014  
51  
52 57 Taylor ME, Delbaere K, Lord SR, *et al.* Neuropsychological, physical, and functional mobility  
53 measures associated with falls in cognitively impaired older adults. *J Gerontol A Biol Sci Med Sci*  
54 2014;**69**:987–95. doi:10.1093/gerona/glt166  
55  
56  
57  
58  
59



- 1  
2  
3 58 Paniagua MA, Malphurs JE, Phelan EA. Older patients presenting to a county hospital ED after a fall:  
4 missed opportunities for prevention. *Am J Emerg Med* 2006;**24**:413–7. doi:10.1016/j.ajem.2005.12.005  
5  
6 59 Ouellet M-C, Sirois M-J, Beaulieu-Bonneau S, *et al.* Correlates of cognitive functioning in independent  
7 elderly patients discharged home from the emergency department after a minor injury. *Int*  
8 *psychogeriatrics* 2016;**28**:1313–22. doi:10.1017/S104161021600065X  
9  
10 60 Welmerink DB, Longstreth WT, Lyles MF, *et al.* Cognition and the Risk of Hospitalization for Serious  
11 Falls in the Elderly: Results From the Cardiovascular Health Study. *Journals Gerontol Ser A Biol Sci*  
12 *Med Sci* 2010;**65A**:1242–9. doi:10.1093/gerona/glq115  
13  
14 61 Taylor ME, Lord SR, Brodaty H, *et al.* A home-based, carer-enhanced exercise program improves  
15 balance and falls efficacy in community-dwelling older people with dementia. *Int psychogeriatrics*  
16 2017;**29**:81–91. doi:10.1017/S1041610216001629  
17  
18 62 National Institute on Aging. Falls and Fractures. 2009.[https://www.nia.nih.gov/health/publication/falls-](https://www.nia.nih.gov/health/publication/falls-and-fractures)  
19 [and-fractures](https://www.nia.nih.gov/health/publication/falls-and-fractures)  
20  
21 63 Beaudoin FL, Merchant RC, Clark MA. Prevalence and Detection of Prescription Opioid Misuse and  
22 Prescription Opioid Use Disorder Among Emergency Department Patients 50 Years of Age and Older:  
23 Performance of the Prescription Drug Use Questionnaire, Patient Version. *Am J Geriatr Psychiatry*  
24 2016;**24**:627–36. doi:10.1016/j.jagp.2016.03.010  
25  
26 64 Mahoney JE, Shea TA, Przybelski R, *et al.* Kenosha County falls prevention study: a randomized,  
27 controlled trial of an intermediate-intensity, community-based multifactorial falls intervention. *J Am*  
28 *Geriatr Soc* 2007;**55**:489–98. doi:10.1111/j.1532-5415.2007.01144.x  
29  
30 65 National Institute on Aging. Driving and dementia: Health professionals can play important role.  
31 2002.[https://www.nia.nih.gov/alzheimers/features/driving-and-dementia-health-professionals-can-play-](https://www.nia.nih.gov/alzheimers/features/driving-and-dementia-health-professionals-can-play-important-role)  
32 [important-role](https://www.nia.nih.gov/alzheimers/features/driving-and-dementia-health-professionals-can-play-important-role)  
33  
34 66 Alden NE, Rabbitts A, Yurt RW. Burn injury in patients with dementia: an impetus for prevention. *J*  
35 *Burn Care Rehabil* 2005;**26**:267–71. <http://www.ncbi.nlm.nih.gov/pubmed/15879750>  
36  
37 67 Ehrlich AR, Kathpalia S, Boyarsky Y, *et al.* Elderly patients discharged home from the emergency  
38 department with minor burns. *Burns* 2005;**31**:717–20. doi:10.1016/j.burns.2004.12.008  
39  
40 68 Lowton K, Laybourne AH, Whiting DG, *et al.* Can Fire and Rescue Services and the National Health  
41 Service work together to improve the safety and wellbeing of vulnerable older people? Design of a  
42 proof of concept study. *BMC Health Serv Res* 2010;**10**:327. doi:10.1186/1472-6963-10-327  
43  
44 69 Lester PE, Kohen I. Smoking in the nursing home: a case report and literature review. *J Am Med Dir*  
45 *Assoc* 2008;**9**:201–3. doi:10.1016/j.jamda.2007.09.002  
46  
47 70 Elder AT, Squires T, Busuttill A. Fire fatalities in elderly people. *Age Ageing* 1996;**25**:214–  
48 6. <http://www.ncbi.nlm.nih.gov/pubmed/8670555>  
49  
50  
51  
52  
53  
54  
55  
56  
57  
58  
59  
60

- 1  
2  
3 71 Tierney MC, Snow WG, Charles J, *et al.* Neuropsychological Predictors of Self-Neglect in Cognitively  
4 Impaired Older People Who Live Alone. *Am J Geriatr Psychiatry* 2007;**15**:140–8.  
5  
6 doi:10.1097/01.JGP.0000230661.32735.c0  
7  
8 72 Charles J, Naglie G, Lee J, *et al.* Self-report measures of well-being predict incident harm due to self-  
9 neglect in cognitively impaired seniors who live alone. *J Alzheimers Dis* 2015;**44**:425–30.  
10  
11 doi:10.3233/JAD-141671  
12  
13 73 Barat I, Andreasen F, Damsgaard EMS. Drug therapy in the elderly: what doctors believe and patients  
14 actually do. *Br J Clin Pharmacol* 2001;**51**:615–22. doi:10.1046/j.0306-5251.2001.01401.x  
15  
16 74 Canadian Institute for Health Information. Hospitalizations and Emergency Department Visits Due to  
17 Opioid Poisoning in Canada. 2016. [https://secure.cihi.ca/free\\_products/Opioid Poisoning Report](https://secure.cihi.ca/free_products/Opioid_Poisoning_Report_EN.pdf)  
18 EN.pdf  
19  
20 75 Tierney MC, Charles J, Jaglal S, *et al.* Identification of Those at Greatest Risk of Harm Among  
21 Cognitively Impaired People Who Live Alone. *Aging, Neuropsychol Cogn (Neuropsychology, Dev*  
22 *Cogn Sect B)* 2001;**8**:182–91. doi:10.1076/anec.8.3.182.829  
23  
24  
25 76 Rowe MA, Feinglass NG, Wiss ME. Persons with dementia who become lost in the community: a case  
26 study, current research, and recommendations. *Mayo Clin Proc* 2004;**79**:1417–22.  
27  
28 doi:10.4065/79.11.1417  
29  
30 77 Valcour VG, Masaki KH, Blanchette PL. Self-Reported Driving, Cognitive Status, and Physician  
31 Awareness of Cognitive Impairment. *J Am Geriatr Soc* 2002;**50**:1265–7. doi:10.1046/j.1532-  
32 5415.2002.50314.x  
33  
34  
35 78 Lafont S, Laumon B, Helmer C, *et al.* Driving Cessation and Self-Reported Car Crashes in Older  
36 Drivers: The Impact of Cognitive Impairment and Dementia in a Population-Based Study. *J Geriatr*  
37 *Psychiatry Neurol* 2008;**21**:171–82. doi:10.1177/0891988708316861  
38  
39 79 Dalsania P. Dementia Dashboard: A Proactive Risk Reduction Management Guideline. *Top Geriatr*  
40 *Rehabil* 2006;**22**:228–42.  
41  
42  
43 80 Frittelli C, Borghetti D, Iudice G, *et al.* Effects of Alzheimer’s disease and mild cognitive impairment  
44 on driving ability: a controlled clinical study by simulated driving test. *Int J Geriatr Psychiatry*  
45 2009;**24**:232–8. doi:10.1002/gps.2095  
46  
47  
48 81 Withaar FK, Brouwer WH, Van Zomeren AH. Fitness to drive in older drivers with cognitive  
49 impairment. *J Int Neuropsychol Soc* 2000;**6**:480–90. doi:DOI: undefined  
50  
51 82 Booth V, Logan P, Harwood R, *et al.* Falls prevention interventions in older adults with cognitive  
52 impairment: A systematic review of reviews. *Int J Ther Rehabil* 2015;**22**:289–96.  
53  
54 doi:10.12968/ijtr.2015.22.6.289  
55  
56 83 Wilber ST, Lofgren SD, Mager TG, *et al.* An Evaluation of Two Screening Tools for Cognitive  
57  
58  
59  
60



- 1  
2  
3 Impairment in Older Emergency Department Patients. *Acad Emerg Med* 2005;**12**:612–6.  
4 doi:10.1197/j.aem.2005.01.017  
5
- 6 84 Carpenter CR, DesPain B, Keeling TN, *et al*. The Six-Item Screener and AD8 for the Detection of  
7 Cognitive Impairment in Geriatric Emergency Department Patients. *Ann Emerg Med* 2011;**57**:653–61.  
8 doi:http://dx.doi.org/10.1016/j.annemergmed.2010.06.560  
9
- 10 85 Lee JS, Verbeek PR, Schull MJ, *et al*. Paramedics assessing Elders at Risk for Independence Loss  
11 (PERIL): Derivation, Reliability and Comparative Effectiveness of a Clinical Prediction Rule. *CJEM*  
12 2016;**18**:121–32. doi:DOI: 10.1017/cem.2016.14  
13
- 14 86 Lee V, Ross B, Tracy B. Functional Assessment of Older Adults in an Emergency Department. *Can J*  
15 *Occup Ther* 2001;**68**:121–9. doi:10.1177/000841740106800208  
16
- 17 87 Veillette N, Demers L, Dutil É. Description de la pratique des ergothérapeutes du Québec en salle  
18 d'urgence. *Can J Occup Ther* 2007;**74**:1–10. doi:10.2182/cjot.07.006  
19
- 20 88 Alldred DP, Raynor DK, Hughes C, *et al*. Interventions to optimise prescribing for older people in care  
21 homes. In: Alldred DP, ed. *Cochrane Database of Systematic Reviews*. Chichester, UK: : John Wiley &  
22 Sons, Ltd 2013. doi:10.1002/14651858.CD009095.pub2  
23
- 24 89 Canada PHA of, Public Health Agency of Canada. The National Blueprint for Injury Prevention in  
25 Older Drivers. 2009.  
26
- 27 90 Fuller GF. Falls in the Elderly. *Am Fam Physician* 2000;**61**:2159–68.  
28
- 29 91 Al-Aama T, Tareef A-A. Falls in the elderly : Spectrum and prevention. *Can Fam physician*  
30 2011;**57**:771–6.  
31
- 32 92 Rapp K, Lamb SE, Büchele G, *et al*. Prevention of Falls in Nursing Homes: Subgroup Analyses of a  
33 Randomized Fall Prevention Trial. *J Am Geriatr Soc* 2008;**56**:1092–7. doi:10.1111/j.1532-  
34 5415.2008.01739.x  
35
- 36 93 Carpenter CR, Avidan MS, Wildes T, *et al*. Predicting geriatric falls following an episode of emergency  
37 department care: a systematic review. *Acad Emerg Med* 2014;**21**:1069–82. doi:10.1111/acem.12488  
38
- 39 94 Taylor ME, Delbaere K, Close JC, *et al*. Managing falls in older patients with cognitive impairment.  
40 *Aging health* 2012;**8**:573–88. doi:10.2217/ahe.12.68  
41
- 42 95 Canadian Institute for Health Information. Sources of Potentially Avoidable Emergency Department  
43 Visits. 2014. [https://secure.cihi.ca/free\\_products/ED\\_Report\\_ForWeb\\_EN\\_Final.pdf](https://secure.cihi.ca/free_products/ED_Report_ForWeb_EN_Final.pdf)  
44
- 45 96 Institut national de santé publique du Québec. Prévenir les chutes chez les aînés vivant à domicile:  
46 Volet soutien à domicile-Intervention multifactorielle personnalisée [IMP]. 2017.  
47  
48  
49  
50  
51  
52  
53  
54  
55  
56  
57  
58  
59  
60

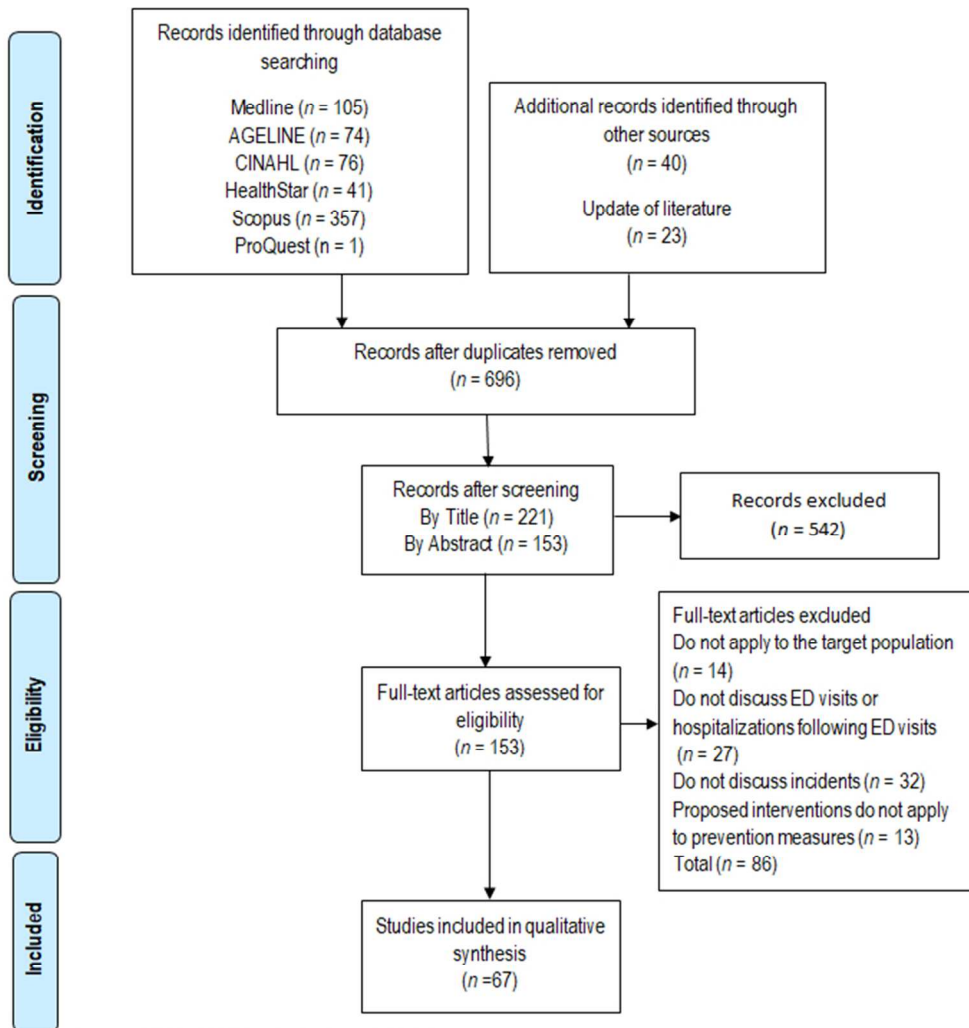

Figure 1. PRISMA FLOW CHART of the scoping review

Figure 1. PRISMA FLOW CHART of the scoping review

184x198mm (96 x 96 DPI)

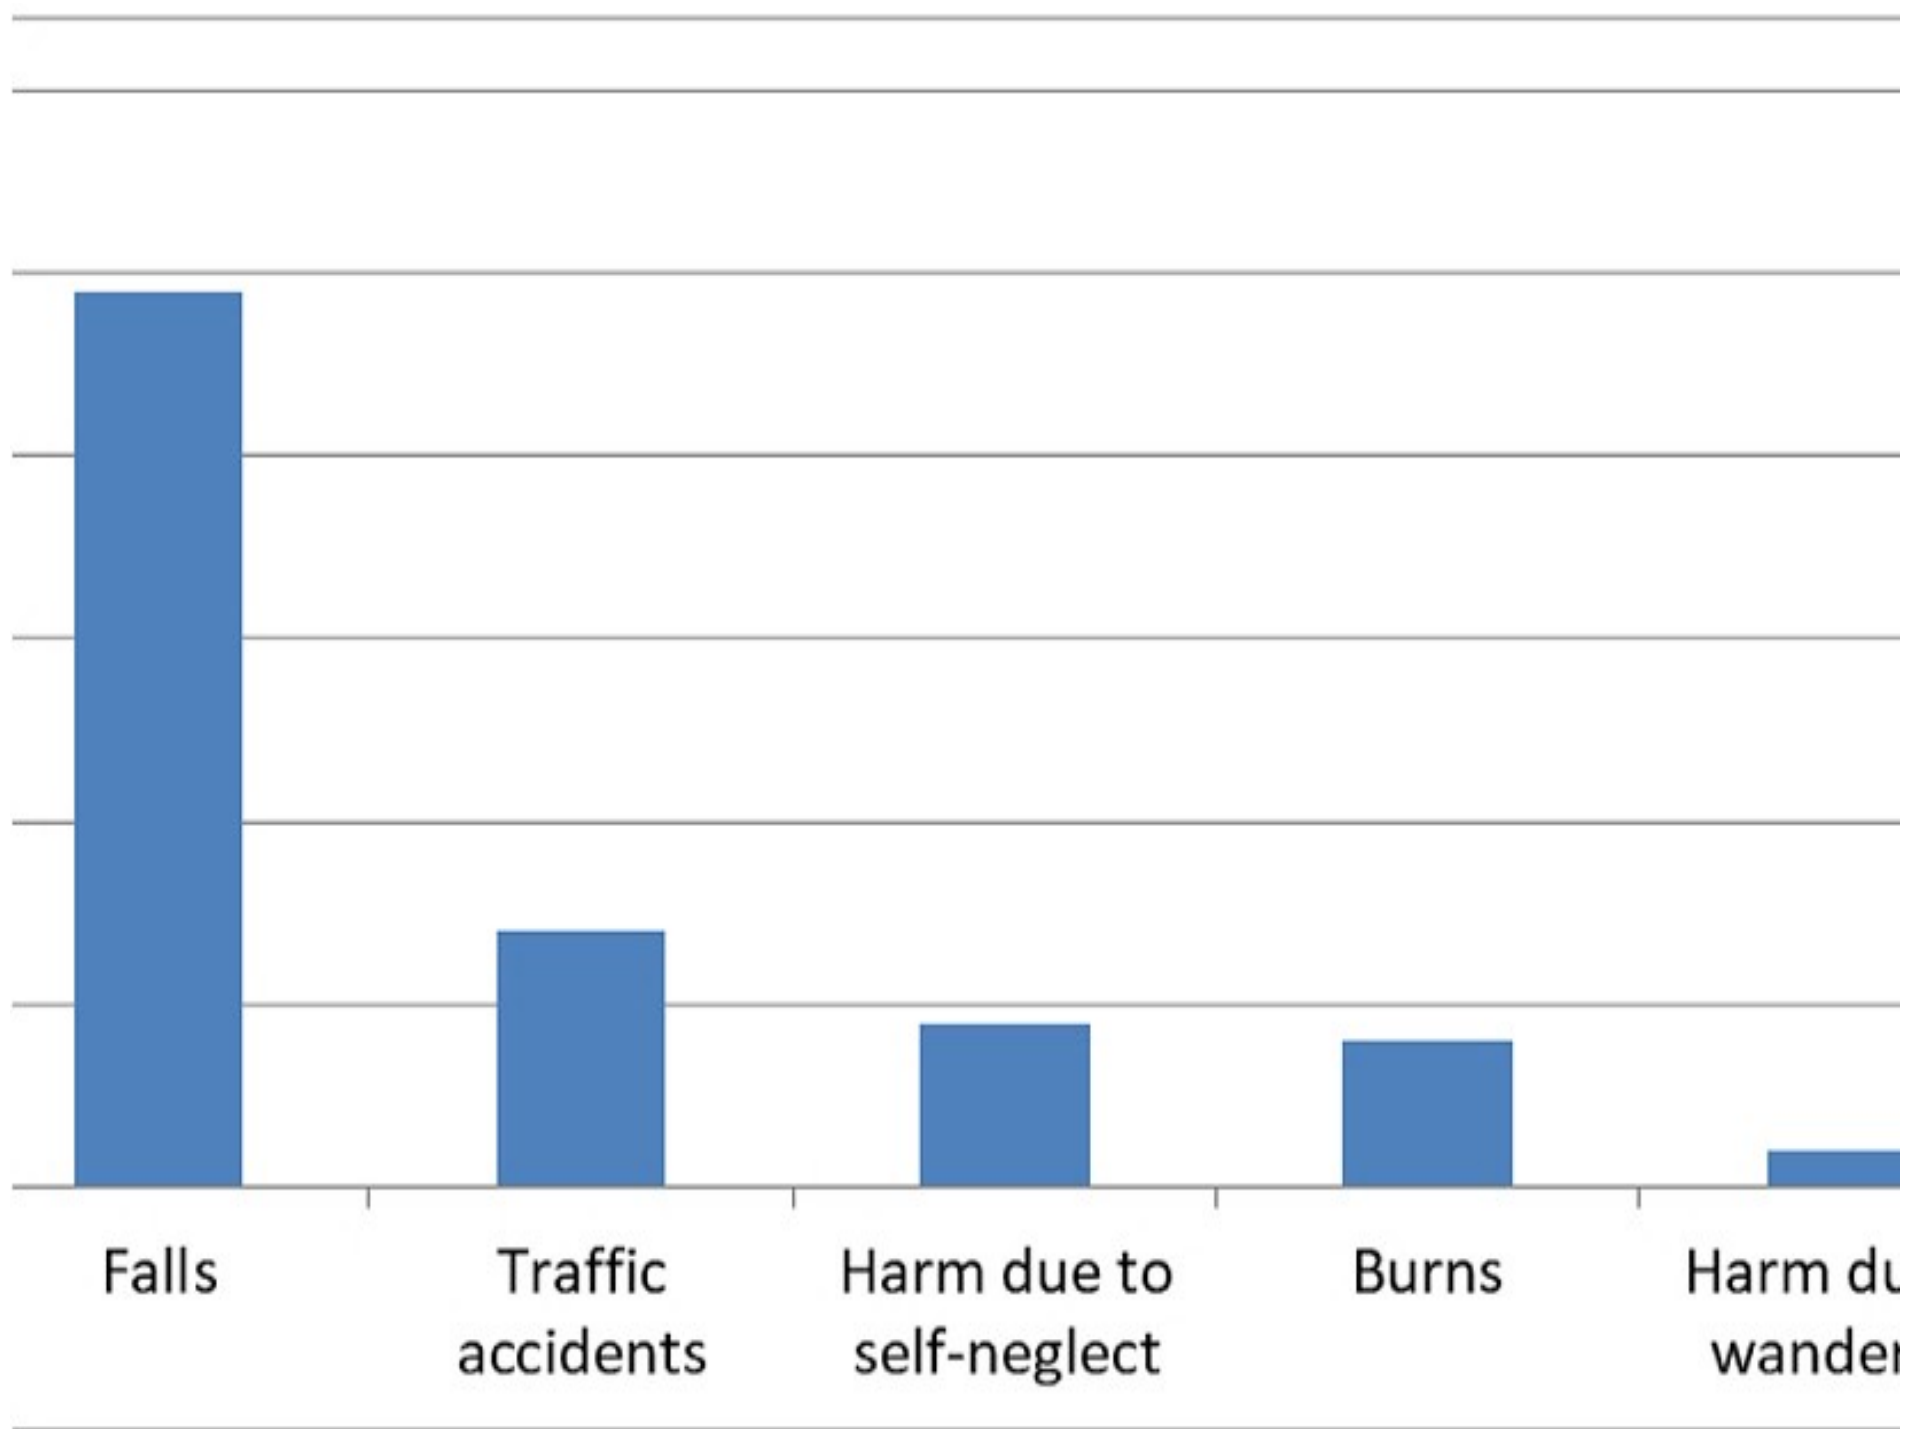

**2. Number of studies mentioning avoidable incidents**

For peer review only - <http://bmjopen.bmj.com/site/about/guidelines.xhtml>

1  
2  
3  
4  
5  
6  
7  
8  
9  
10  
11  
12  
13  
14  
15  
16  
17  
18  
19  
20  
21  
22  
23  
24  
25  
26  
27  
28  
29  
30  
31  
32  
33  
34  
35  
36  
37  
38  
39  
40  
41  
42  
43  
44  
45  
46  
47

## SUPPLEMENTARY FILES

| Concept                                   | Controlled and Natural Keywords                                                                                                                                                                                                                                                                                                                                                                                                                                                                                                          |
|-------------------------------------------|------------------------------------------------------------------------------------------------------------------------------------------------------------------------------------------------------------------------------------------------------------------------------------------------------------------------------------------------------------------------------------------------------------------------------------------------------------------------------------------------------------------------------------------|
| <b>Avoidable Incident</b>                 | <p>"Accidental Injur*" OR "Unintentional injur*" OR "Traumatic Injur*" OR "Traumatic brain injur*" OR "Accidental Trauma*" OR "Unintentional trauma*" OR "Accidental Fall*" OR "Fall injur*" OR "Burn Injur*" OR "Car Accident*" OR "Traffic Accident*" OR "Automobile Accident*" OR "Pedestrian Accident*" OR Intoxication OR Poisoning OR "Heat Stroke*" OR Frostbite OR "Medication Error*" OR Wander* OR Self-neglect* OR "Home Accident*" OR TI Fall* OR TI Burn* OR TI Scald* OR TI Trauma OR Sprain* OR "Accident Prevention"</p> |
| <b>Older adults</b>                       | <p>Senior* OR Elder* OR "Older Adult*" OR Old* People OR "Old Age" OR "Geriatric Patient*"</p> <p><u>Medline and CINAHL:</u><br/>MH "Wounds and Injuries+" OR MH "Accidental Falls" OR MH "Burns+" OR MH "Accidents" OR MH "Fires+" OR MH "Accidents, Home" OR MH "Accidents, Traffic"</p> <p><u>Medline</u><br/>MH "Accident Prevention"</p> <p><u>Ageline:</u><br/>DE Injuries OR DE Burns OR DE "Accidents+" OR DE "Fires"</p>                                                                                                        |
| <b>Emergency department presentations</b> | <p>Emergency service*" OR "Emergency Department*" OR "Emergency Hospital Service*" OR "Emergency Unit*" OR "Hospital Service Emergency" OR "Emergency Ward*" OR "Emergency Attendance" OR Emergency N2 Admission* OR Emergency N2 Admitt* OR Emergency N2 Visit* OR Emergency N2 Utilization OR Emergency N2 Use OR "Accident and Emergency" OR "A&amp;E"</p> <p><u>Medline:</u><br/>MH "Emergency Service, Hospital+"</p> <p><u>CINAHL:</u><br/>MH "Emergency Service+"</p> <p><u>Ageline:</u><br/>DE "Emergency Health Services"</p>   |
| <b>Cognitive impairment</b>               | <p>"Cognitive decline" OR "Cognitive* Impair*" OR "Cognitive Deficit*" OR "Cognitive Dysfunction*" OR "Cogniti* Disorder*" OR Dement* OR "Alzheimer* disease*"</p> <p><u>Medline and CINAHL:</u><br/>MH "Dementia+" OR MH "Cognition Disorders+"</p> <p><u>Ageline :</u><br/>DE "Cognitive Impairment" OR DE Dementia</p>                                                                                                                                                                                                                |

# BMJ Open

## Preventing emergency department (ED) visits and hospitalizations of older adults with cognitive impairment compared to the general senior population: what do we know about avoidable incidents? Results from a scoping review

|                                 |                                                                                                                                                                                                                                                                                                                                                                                                                                                                                                                                     |
|---------------------------------|-------------------------------------------------------------------------------------------------------------------------------------------------------------------------------------------------------------------------------------------------------------------------------------------------------------------------------------------------------------------------------------------------------------------------------------------------------------------------------------------------------------------------------------|
| Journal:                        | <i>BMJ Open</i>                                                                                                                                                                                                                                                                                                                                                                                                                                                                                                                     |
| Manuscript ID                   | bmjopen-2017-019908.R1                                                                                                                                                                                                                                                                                                                                                                                                                                                                                                              |
| Article Type:                   | Research                                                                                                                                                                                                                                                                                                                                                                                                                                                                                                                            |
| Date Submitted by the Author:   | 22-Jan-2018                                                                                                                                                                                                                                                                                                                                                                                                                                                                                                                         |
| Complete List of Authors:       | Gagnon-Roy, Mireille; Université de Montréal, École de réadaptation hami, benyahia; Université de Sherbrooke, Faculté de médecine et des sciences de la santé<br>Généreux, Mélissa; Direction de la Santé Publique de l'Estrie-CIUSS de l'Estrie-CHUS<br>Veillette, Nathalie; Université de Montréal, École de réadaptation<br>Sirois, Marie-Josée; Université Laval, Département de réadaptation<br>Egan, Mary; University of Ottawa, Rehabilitation Sciences<br>Provencher, Véronique; Centre de recherche sur le vieillissement, |
| <b>Primary Subject Heading</b>: | Emergency medicine                                                                                                                                                                                                                                                                                                                                                                                                                                                                                                                  |
| Secondary Subject Heading:      | Public health                                                                                                                                                                                                                                                                                                                                                                                                                                                                                                                       |
| Keywords:                       | Accident prevention, Emergency Department Visit, Older Adults, Cognitive Impairment                                                                                                                                                                                                                                                                                                                                                                                                                                                 |
|                                 |                                                                                                                                                                                                                                                                                                                                                                                                                                                                                                                                     |

SCHOLARONE™  
Manuscripts

**Title:**

**Preventing emergency department (ED) visits and hospitalizations of older adults with cognitive impairment compared to the general senior population: what do we know about avoidable incidents? Results from a scoping review.**

**Authors' names and affiliations:**

Mireille Gagnon-Roy, École de réadaptation, Faculté de médecine, Université de Montréal, Montréal, QC, Canada

Benyahia Hami, Faculty of Medicine and Health Sciences, University of Sherbrooke, Research Centre on Aging, Sherbrooke, QC, Canada

Mélissa Généreux, Direction de la Santé Publique de l'Estrie-CIUSS de l'Estrie-CHUS, Sherbrooke, QC, Canada

Nathalie Veillette, École de réadaptation, Faculté de médecine, Université de Montréal, Centre de recherche de l'IUGM, Montréal, QC, Canada

Marie-Josée Sirois, Département de réadaptation, Faculté de médecine, Université Laval, CHU de Québec, Québec, QC, Canada

Mary Egan, Rehabilitation Sciences, Faculty of Health Sciences, University of Ottawa, Bruyere Institute, Ottawa, ON, Canada

Véronique Provencher, Centre de recherche sur le vieillissement, CSSS-IUGS, Sherbrooke, QC, Canada, J1H 4C4; 1-819-821-8000 post 70525 [veronique.provencher@usherbrooke.ca](mailto:veronique.provencher@usherbrooke.ca)

**Corresponding Author :**

Véronique Provencher, 1036 Belvédère Sud, Sherbrooke, QC, Canada, J1H 4C4; 1-819-821-8000 post 70525, Fax : 1-819-829-7141, [veronique.provencher@usherbrooke.ca](mailto:veronique.provencher@usherbrooke.ca)

**Keywords:**

Accident Prevention, Emergency Department Visit, Older Adults, Cognitive Impairment.

**Number of words:** 3862 words

## ABSTRACT

**Objectives:** Older cognitively impaired adults present a higher risk of hospitalization and mortality following a visit to the emergency department (ED). Better understanding of avoidable incidents is needed to prevent them and the associated ED presentations in community-dwelling adults. This study aimed to synthesize the actual knowledge concerning these incidents leading this population to ED presentation, as well as possible preventive measures to reduce them.

**Design:** A scoping review was performed according to the Arksey and O'Malley (2005) framework.

**Methods:** Scientific and gray literature published between 1996 and 2017 were examined in databases (MEDLINE, CINAHL, Ageline, SCOPUS, ProQuest Dissertations/theses, EBM Reviews, Healthstar), online library catalogues, governmental websites and published statistics. Sources discussing avoidable incidents leading to ED presentations were included, and then extended to those discussing hospitalization and mortality, due to a lack of sources. Data (type, frequency, severity and circumstances of incidents, preventive measures) was extracted using a thematic chart, then analysed with content analysis.

**Results:** 67 sources were included in this scoping review. Five types of avoidable incidents (falls, burns, transport accidents, harm due to self-negligence, and due to wandering) emerged, and all but transport accidents were more frequent in cognitively impaired seniors. Differences regarding circumstances were only reported for burns, as scalding was the most prevalent mechanism of injury for this population, compared to flames for the general senior population. Multifactorial interventions and implications of other professionals (e.g. pharmacist, firefighters) were reported as potential interventions to reduce avoidable incidents. However, few preventive measures were specifically tested in this population.

**Conclusions:** Primary research that screens for cognitive impairment and involves actors (e.g. paramedics) to improve our understanding of avoidable incidents leading to ED visits is greatly needed. This knowledge is essential to develop preventive measures tailored to the needs of older cognitively impaired adults.

### STRENGTHS AND LIMITATIONS OF THIS STUDY

- This study provides an accurate overview of the current knowledge about avoidable incidents leading older adults, with and without cognitive impairment, to an ED presentation and hospitalization, as well as preventive measures that may be implemented to avoid these incidents.
- This study followed a rigorous method, guided by two experienced librarians, completed independently by at least two reviewers at each step, and reviewed by experienced researchers and stakeholders in the field.
- Some avoidable incidents were not discussed in this scoping review, as they were not differentiable from medical conditions (e.g. urinary tract infection due to dehydration).
- Considering the lack of sources focussing on ED presentation and avoidable incidents, sources discussing hospitalizations were included for some types of incidents (e.g. burns) to better understand them.



## INTRODUCTION

As the worldwide population ages, an increasing number of older adults (65+) are consulting at emergency departments (ED). In Canada, this population is 1.5 times more likely to visit the ED than the younger population [1]. Furthermore, among these older adults, between 21 to 42% present with cognitive impairment, which exacerbates the risk of negative outcomes following an ED visit, and reduces the probability of returning home [2–6]. Considering the high costs and negative consequences associated with this sub-population's use of ED and hospital healthcare services [1], it is crucial to prevent potentially avoidable incidents leading to ED visits and hospitalizations, especially in older adults with cognitive impairment.

Avoidable incidents, which may refer to unintentional injuries due to falls, motor vehicle traffic crashes, toxic substances, fire/hot objects, or other external causes [7], represent a large proportion (over 20%) of ED visits by older adults [8–11]. Those with cognitive impairment often present judgment errors and self-neglect behaviors, which may put them at a higher risk of various avoidable injuries (e.g. burning themselves while cooking, due to forgetting to turn off electrical appliances, poisoning after eating spoiled food in the refrigerator, falls caused by failure to use walking aids) [12,13]. Many preventive measures (e.g. fall prevention programs and driving classes for seniors) have been developed and implemented to reduce avoidable incidents in community-dwelling adults [14–16]. However, these preventive measures may not be tailored to the specific needs of older adults with cognitive impairment, as most were not developed for this vulnerable population, or may exclude it altogether [17,18]. As a result, little is known about best measures to implement to reduce avoidable incidents and related ED visits in this sub-population. Increased knowledge about avoidable incidents leading older adults with cognitive impairment to ED presentations and the circumstances in which they occur, compared to the senior population in general, will help to identify appropriate preventive measures that could be implemented upstream.

This study aims at synthesizing the current knowledge related to avoidable incidents leading to ED presentations by older people with cognitive impairment living in the community, as well as potential preventive measures aiming at reducing them. More specifically, we aimed to identify (1) the type, frequency, and severity of avoidable incidents associated with presentations to the ED, by older adults with cognitive impairment, compared to the general senior population, (2) the circumstances in which they occurred and (3) if they could have been avoided by safe and healthy environments or behaviors.

## METHODOLOGY

As an initial step to identify priorities for the development of a comprehensive preventive approach, a scoping review was completed using the six stages refined by Levac et al. [19] according to Arksey and O'Malley methodology [20]. This project's protocol was published in 2016 [21].

This scoping review first aimed to answer the main research question: "What is the actual knowledge on avoidable incidents leading to ED presentation by older adults living in the community, particularly those with cognitive impairment, in order to implement preventive measures that are tailored to their needs?" Four specific questions were then identified:

- 1) What are the main types of avoidable incidents associated with presentations to the ED by seniors with cognitive impairment, compared to the general senior population (e.g., fall-related injuries, food poisoning, heat stroke)?
- 2) Are they more or less frequent and serious compared to older adults without cognitive impairment?
- 3) Do they occur in specific circumstances (e.g., during the day/night, in the summer/winter, indoor/outdoor, when driving/cooking)?
- 4) Could they have been avoided by safe and healthy environments or behaviors?

For this review, incidents were defined as physical injuries to self or others, property loss, or property damage. More precisely, avoidable incidents referred to traumatic injuries (e.g., hip, wrist), poisoning (e.g., inadvertent medication overdose, biological substances) and some other consequences of external causes (e.g., frostbite, burn, heat stroke) [22].

Using a research strategy validated by two librarians (FL and KR), scientific and grey literature published in English and in French between 1996 and 2016 was explored through a variety of databases [21]. A total of 654 sources were found and exported to reference manager software (Zotero). Following the elimination of duplicates and non-English or French sources, 633 scientific sources remained (see figure 1). An update of the literature published until April 2017 was also completed, increasing the number of sources to 656. Screening was then completed independently by two members of the research team (MGR and BH) and/or two collaborators (ACLC and SS) according to our inclusion criteria. More precisely, sources were included if the participants were: (a) 65 years old and over, with or without cognitive impairment as documented by screening tests or

1  
2  
3 categorized by the authors of the sources (seniors who were reported “independent” by authors were  
4 also categorized as older adults without cognitive impairment), (b) living in the community (house,  
5 private residence, senior housing or other structured environments), and (c) presenting to the ED  
6 because of an avoidable incident [21]. As incidents occurring in seniors with cognitive impairment  
7 were rarely discussed in literature, sources from other hospital settings (e.g., hospitalization) were  
8 also included when too few sources focused on ED visits. Furthermore, sources were considered if  
9 they focused on strategies and preventive measures to avoid these incidents. After screening by title  
10 and abstract, 153 sources remained. Finally, 67 sources were included for complete analysis.

11  
12  
13  
14  
15  
16  
17 Data charting was performed independently by two members of the research team (MGR and BH)  
18 and/or two collaborators (SS and ACLC) using the data charting form developed according to the  
19 study’s objectives [21]. To insure interrater agreement, four articles were analyzed independently by  
20 the first author and each of the reviewers. Descriptive numerical summary analysis and content  
21 analysis [23] were also independently performed by two members of the research team (MGR and  
22 BH), as described in the protocol [21]. Results were reported using descriptive statistics and narrative  
23 synthesis, according to the main type of avoidable incidents emerging from literature. Finally,  
24 results were presented to stakeholders from the Regional Public Health Department in the province of  
25 Quebec (Canada), and researchers in gerontology and emergency department services.

## 33 RESULTS

### 34 Overview of results

35  
36  
37  
38 *Study designs and definitions:* Out of the 67 sources included in this scoping review, 29 were  
39 descriptive studies (43%), 10 were literature reviews, 4 were empirical studies, 4 were statistical  
40 papers, 4 were expert opinions, and 16 were documents from grey literature.

41  
42  
43  
44 *Population:* 25 sources (37%) included participants with documented cognitive impairment, 6 sources  
45 included older adults without cognitive impairment as assessed by screening tests or reported as  
46 “independent in daily living activities” by authors, while 36 documents (54%) did not detail the  
47 cognitive status of older patients.

48  
49  
50  
51  
52 *Setting:* 24 sources included data from the ED (36%), 3 sources only focused on the hospital care  
53 setting (e.g. hospitalizations) (4%), and 40 sources focused on the community (60%).

1  
2  
3 *Types of incidents:* The most commonly mentioned incidents were falls, which were mentioned in 49  
4 papers (73%). Traffic accidents were mentioned in 14 papers (21%), followed by harm due to self-  
5 neglect (13%), burns (12%), and harm due to wandering (3%) (see figure 2). Preventive measures  
6 were discussed in 44 papers (66%).  
7  
8  
9

10 *Country of publication:* Canadian and US studies dominated the review ( $n = 44$ ; 66%), with 23 and  
11 21 sources, respectively. Six were from the U.K., three from Australia and New-Zealand, two from  
12 France, and two from Sweden.  
13  
14  
15

16 *Year of publication:* One third of the sources was published in 2013-2017 ( $n = 22$ ; 33%), one quarter  
17 was published in 2008-2012 ( $n = 18$ ; 27%) and another quarter was published between 2003 and  
18 2007 ( $n = 18$ ; 27%). The remaining ( $n = 9$ ; 13%) were published before 2002. Included sources are  
19 displayed in supplementary files.  
20  
21  
22  
23  
24

### 25 **Avoidable incidents**

26 *Falls:* Not surprisingly, falls emerged as the main type of incident among older adults, whether  
27 associated with an ED presentation and use of medical services, or not (30-80%) [24–29], and as the  
28 main cause of injury (e.g. fractures) [30] in this population [29,31–33]. Falls were also the main cause  
29 of hospitalizations (62-80%) and ED visits (59-85%) following an incident [8,11,27–29,31,32,34–47].  
30 When comparing older adults, with and without cognitive impairment, the cognitively impaired were  
31 reported to fall more often (60-80%) than the non-impaired (30%) [24–29], as well as being  
32 hospitalized more often due to falls (around 19%) than the general senior population (14% of total  
33 hospitalizations) [44–46]. Nonetheless, the difference between older adults, with and without  
34 cognitive impairment, in terms of ED visits following a fall compared to the total number of visits, is  
35 non-significant (11.1% vs 10.4% respectively) [41]. Furthermore, seniors with cognitive impairment  
36 sustained more severe injuries, and were 3 times more at risk of fractures than those without cognitive  
37 impairment [25].  
38  
39  
40  
41  
42  
43  
44  
45  
46  
47

48 In terms of circumstances, no difference was documented between the two sub-populations. Falls  
49 mainly occurred at home or nearby (47-74%) [27,29,34,36,39,42,48–51]. The toilet was the most  
50 common site (29%), followed by the living room (18%) and the kitchen (14%) [35]. Falls happened  
51 mostly during the day [32,47,52]. Ice and winter conditions were also associated with falls [53].  
52  
53  
54  
55  
56  
57  
58  
59  
60

1  
2  
3 Finally, many studies outlined the link between falls and the following factors: Cognitive impairment  
4 [26,34,41,43,54–58], wandering [54], poor physical condition [26,27,31,34,35,55,59], medical  
5 conditions [26,27,31,34–36,48,49,56], polymedication, and some types of medication  
6 [26,32,55,56,60,61], living alone [34,62], and hazards in the environment [26,35,52].  
7  
8  
9

10 Transport accidents : Traffic accidents were the second cause of ED visits (14-22.6%) and  
11 hospitalizations following an incident [9,11,28,31,32,37]. When comparing older adults, with and  
12 without cognitive impairment, those with cognitive impairment were significantly less hospitalized  
13 (3.5%) than those without (35% of total hospitalizations following an incident) [43].  
14  
15  
16  
17

18 In terms of circumstances, no difference pertaining to cognitive impairment was documented.  
19 Accidents mainly occurred during the day, on weekends (Friday to Sunday) and between May and  
20 August [32]. Meanwhile, approximately 60% of hospitalized older adults with cognitive impairment  
21 were driving at the time of the accident [43].  
22  
23  
24  
25

26 Several factors were linked to a higher risk of traffic accidents, including cognitive impairment  
27 [28,63], reckless behavior [63] and deteriorating physical condition [28].  
28  
29

30 Burns: Burns emerged as the third cause of ED visits following an incident (2-3%) [9,35], and the  
31 third cause of home injuries [54]. Burns in cognitively impaired seniors were reported to cause more  
32 morbidity and mortality (25%) than in the general senior population (13.8%) [54,64]. Differences  
33 were also noted regarding major burn mechanisms. The main major burn mechanism among  
34 cognitively impaired seniors was scalding (44.4%), followed by flame burns (36.1%) and contact  
35 (18%) [64], while flames or flash were the most common in the general senior population (51-81%),  
36 followed by scalding (11-30%) and contact (5-7%) [65].  
37  
38  
39  
40  
41  
42

43 In both sub-populations, most burns occurred at home [64,65]. Older adults with cognitive  
44 impairment mainly suffered burns while bathing (31%) and cooking (16%) [64]. On the other hand,  
45 27 to 40% of major burns and 68% of minor burns in older adults without cognitive impairment  
46 occurred in the kitchen [65].  
47  
48  
49

50 Many factors were associated with burns, such as physical condition [65–67], cognitive impairment  
51 [54,66,67], polymedication [66], reckless behaviors [65,67], and living alone [66,68].  
52  
53  
54  
55  
56  
57  
58  
59  
60

1  
2  
3 *Harm due to self-neglect:* In older adults with cognitive impairment, harm due to self-neglect was  
4 reported as an avoidable incident, with an incidence of 11 to 21%, of which 70% needed urgent care  
5 [13,69,70]. Major harm due to self-neglect included: failure to eat/drink, failure to follow instructions  
6 (treatment, medication or technical aids), failure to report a medical condition, and failure to maintain  
7 personal hygiene [13,69,70]. Furthermore, older adults with cognitive impairment were more at risk  
8 of noncompliance to medication than those without cognitive impairment [54,71,72]. Finally, harm  
9 due to self-neglect can be influenced by polymedication [61,71] and cognitive impairment [69,70,73].  
10  
11  
12  
13  
14  
15

16 *Harm due to wandering:* Older adults with cognitive impairment were more at risk to get lost and  
17 suffer from consequent harm (e.g. frostbite), regardless of their living arrangements, especially when  
18 left unattended. Around 13% were in an outing that they regularly took alone [74].  
19  
20  
21  
22

### 23 **Preventive measures**

24 Preventive measures identified through this scoping review are displayed in Table 1a (individual  
25 interventions) and Table 1b (environmental interventions). Most of them were applied to the general  
26 senior population, and not to the older adults with cognitive impairment. Identified prevention  
27 programs could be implemented in the person's micro-environment (at home) or macro-environment  
28 (community).  
29  
30  
31  
32

33 Measures to prevent falls were the most common theme. Home assessments and adaptations ( $n = 16$ ),  
34 as well as physical exercise, (e.g. strength and balance exercises) ( $n = 15$ ) were the most frequently  
35 described interventions, followed by medication review ( $n = 12$ ), use of assistive devices ( $n = 11$ ) and  
36 improved nutrition (e.g. food supplements) ( $n = 10$ ). The second major theme pertained to preventive  
37 measures for traffic accidents ( $n = 6$ ). Interventions included cognitive and physical screening in  
38 older adults by the physician, as well as environmental interventions, including government measures  
39 (e.g. regulations and preventive campaigns). Interventions to prevent burns were also environmental,  
40 such as home assessment and modifications targeting high-risk populations (e.g. using temperature  
41 controls to reduce risks of scalding). In terms of self-neglect, interventions focused on noncompliance  
42 (e.g. walking aid, medication) and environmental interventions (surveillance and home visits targeting  
43 high-risk populations). Finally, preventive measures to reduce wandering mainly encompassed  
44 community involvement, (e.g. neighborhood and family), and special programs and plans to prevent  
45 or rapidly intervene after the incident.  
46  
47  
48  
49  
50  
51  
52  
53  
54  
55  
56  
57  
58  
59  
60

**Table 1a.** Individual-level interventions organized by types of incidents

| Individual-level interventions |                                                                                                                                                                                                                                                                                                                                                                                                                               |                                                                                                                                                                                                        |                                                                                                                                                                                  |
|--------------------------------|-------------------------------------------------------------------------------------------------------------------------------------------------------------------------------------------------------------------------------------------------------------------------------------------------------------------------------------------------------------------------------------------------------------------------------|--------------------------------------------------------------------------------------------------------------------------------------------------------------------------------------------------------|----------------------------------------------------------------------------------------------------------------------------------------------------------------------------------|
|                                | Physical/medical                                                                                                                                                                                                                                                                                                                                                                                                              | Cognitive                                                                                                                                                                                              | Assistive devices                                                                                                                                                                |
| Falls                          | <ul style="list-style-type: none"> <li>- Medication review and modification [25,26,33,34,42,50,51,75–79]</li> <li>Balance and strength exercises [25–27,33,34,51,55,59,60,75,76,78–81]</li> <li>- Better nutrition [27] and supplements [26,33,42,50,51,55,76–78]</li> <li>- Better sleep [60]</li> <li>- Management of chronic and acute conditions [25,51,75,76] including visual correction [26,33,42,51,75–78]</li> </ul> | <ul style="list-style-type: none"> <li>- Education on risks and prevention measures [25,35,50,51,75,81,82]</li> <li>- Education on dementia [44]</li> <li>- Fear of falling assessment [51]</li> </ul> | <ul style="list-style-type: none"> <li>- Mobility-aid devices [34,75,78]</li> <li>- Anti-slip shoes and devices [26,27,29,52,60,77]</li> <li>- Hip protectors [50–52]</li> </ul> |
| Traffic accidents              | <ul style="list-style-type: none"> <li>- Recommendations to restrict or to stop driving [75]</li> <li>- Regular medical examination [36,63]</li> </ul>                                                                                                                                                                                                                                                                        | <ul style="list-style-type: none"> <li>- Safety education programs for seniors [28]</li> </ul>                                                                                                         |                                                                                                                                                                                  |
| Burns                          |                                                                                                                                                                                                                                                                                                                                                                                                                               | <ul style="list-style-type: none"> <li>- High-risk behavior assessment [65]</li> </ul>                                                                                                                 |                                                                                                                                                                                  |
| Harm due to self-neglect       | <ul style="list-style-type: none"> <li>- Medication review and modification [71,73,75,83]</li> </ul>                                                                                                                                                                                                                                                                                                                          | <ul style="list-style-type: none"> <li>- Education of patient on treatment and non-adherence prevention measures [71]</li> </ul>                                                                       | <ul style="list-style-type: none"> <li>- Compliance aids (pill organizers, medication schemes) [71,73]</li> </ul>                                                                |
| Harm due to wandering          |                                                                                                                                                                                                                                                                                                                                                                                                                               |                                                                                                                                                                                                        | <ul style="list-style-type: none"> <li>- Identification bracelet [75]</li> </ul>                                                                                                 |

**Table 1b.** Environmental interventions organized by types of incidents

| Environmental interventions |                                                                                                                                                                                                          |                                                                                                                                                                                                                                          |                                                                                                                                                                                                                                                                                                                                                                                               |
|-----------------------------|----------------------------------------------------------------------------------------------------------------------------------------------------------------------------------------------------------|------------------------------------------------------------------------------------------------------------------------------------------------------------------------------------------------------------------------------------------|-----------------------------------------------------------------------------------------------------------------------------------------------------------------------------------------------------------------------------------------------------------------------------------------------------------------------------------------------------------------------------------------------|
|                             | Physical                                                                                                                                                                                                 | Social                                                                                                                                                                                                                                   | Organizational                                                                                                                                                                                                                                                                                                                                                                                |
| Falls                       | <ul style="list-style-type: none"> <li>- Home assessment and adaptation [27,29,33,34,42,46,51,60,66,75,77–79,81]</li> <li>- Better roads and sidewalk maintenance, especially in winter [52]</li> </ul>  | <ul style="list-style-type: none"> <li>- Education of caregivers and staff on risks and prevention measures [25,35,50,51,75,81,82] even entire communities [51]</li> <li>- Education of caregivers and staff on dementia [44]</li> </ul> | <ul style="list-style-type: none"> <li>- Improvement of building code and regulations [34]</li> <li>- Smartphone apps to report changes in the environment or surface conditions [52]</li> <li>- A public phone line to report falls and fall risks in the environment [34]</li> <li>- Multidisciplinary teams [78] and multifactorial interventions (e.g. PROFET*, MPI**) [78,84]</li> </ul> |
| Traffic accidents           | <ul style="list-style-type: none"> <li>- Elderly-friendly environment / public amenities [28,36]</li> <li>- Increased stoplight and pedestrian crossing times, modified roadway markings [28]</li> </ul> | <ul style="list-style-type: none"> <li>- Education of staff and caregivers regarding risks, monitoring and supervision [63,75,85]</li> </ul>                                                                                             | <ul style="list-style-type: none"> <li>- Road safety campaigns [36,85]</li> <li>- Stricter law enforcement related to jay-walking [28]</li> <li>- Promoting alternatives to driving [36,50,63,75,85]</li> </ul>                                                                                                                                                                               |
| Burns                       | <ul style="list-style-type: none"> <li>- Comprehensive home safety evaluation and modifications [27,65]</li> <li>- Home fire safety visits targeting vulnerable populations [66]</li> </ul>              | <ul style="list-style-type: none"> <li>- Education for caregivers on dementia and on burn safety measures, including adequate assistance and supervision [64]</li> </ul>                                                                 | <ul style="list-style-type: none"> <li>- Nursing home policies limiting smoking to under supervision and in determined locations [67]</li> <li>- Smoking cessation programs (social/emotional support, non-smoking related activities, pharmacological options) [67]</li> </ul>                                                                                                               |
| Harm due to self-neglect    |                                                                                                                                                                                                          | <ul style="list-style-type: none"> <li>- Frequent visits by staff or family members trained to identify problems associated with negligence [69]</li> </ul>                                                                              | <ul style="list-style-type: none"> <li>- Case management for high-risk population [69]</li> </ul>                                                                                                                                                                                                                                                                                             |
| Harm due to wandering       |                                                                                                                                                                                                          | <ul style="list-style-type: none"> <li>- Education of informal and formal caregivers [74]</li> <li>- Strategies including neighbors, formal-informal caregivers and law enforcement [74,75]</li> </ul>                                   | <ul style="list-style-type: none"> <li>- Special programs (e.g. Safe Return) that help rapidly locate and return lost individuals [74]</li> <li>- Safety plans in formal care settings that prevent wandering [74]</li> </ul>                                                                                                                                                                 |

\*PROFET= Prevention of falls in the elderly trial; \*\*MPI=Multifactorial personalized Intervention



## DISCUSSION

In this scoping review, we aimed to examine literature about avoidable incidents leading older adults with cognitive impairment to ED presentations in order to identify preventive measures that could be implemented to reduce such incidents. Furthermore, as incidents occurring in seniors with cognitive impairment were rarely discussed in literature, the search was extended to other hospital settings (e.g., hospitalization) when too few sources focused on ED visits. Five main types of incidents emerged from literature: falls, traffic accidents, burns, harm due to self-neglect, and harm due to wandering. Of those, most were more frequent in cognitively impaired seniors, as they may present judgment errors and unsafe behaviors [12,13]. The only exceptions were hospitalizations related to traffic accidents, and ED presentations related to falls, for which the difference of prevalence between the two sub-populations was not significant. Differences regarding hospitalizations following traffic accidents could be explained by a significantly lower number of cognitively impaired drivers compared to older drivers without such impairment, as the dementia diagnosis was strongly associated with driving cessation [86,87]. Nonetheless, when driving, cognitively impaired adults were at increased risk of experiencing an incident (whether or not associated with an ED presentation or hospitalization) than those without such impairment [43,63,75] and may be less fit for driving [88,89]. On the other hand, the difference of ED presentations related to falls between both sub-population was not significant. This could be explained by the fact that most studies in the ED were based on medical files analysis, which lacked a systematic review of cognitive status. As a result, the number of older adults with cognitive impairment or dementia may have been underestimated, therefore reducing the difference between both sub-population in terms of ED presentations following a fall. Nevertheless, falls emerged as the main type of incident for both sub-populations. This result is congruent with its actual importance in the scientific literature (73% of the sources reported in this scoping review), as well as its predominance in deployed preventive measures. In fact, in Canada, more than 50 community-based programs were developed and deployed with older adults in 2001 to prevent falls [16], which seem far more numerous than programs for other types of incidents.

One of the main objectives of this scoping review was to document the circumstances under which the incidents occurred. Unfortunately, this description remains limited and focused only on the three main types of incident (falls, traffic accidents, and burns). Consequently, little is known about the activities carried out at the time of the incident. As this information could facilitate the development

1  
2  
3 of preventive measures according to risk factors (e.g. adapt preventive measures according to the  
4 circumstances of traffic accidents), future studies in the ED should further detail the circumstances of  
5 incidents in seniors. Moreover, one of the main limitations of our study was the difficulty to  
6 differentiate harm due to incidents from other medical causes (e.g. infections, side effects to  
7 medication), as some medical conditions may be caused by avoidable incidents (e.g. bad hygiene  
8 caused by self-neglect can lead to infections; noncompliance to medication can lead to a variety of  
9 sides effects) [13,73]. For this scoping review, we decided to exclude all medical conditions with  
10 unknown or unclear causes. Consequently, the prevalence of avoidable incidents, such as harm due to  
11 self-neglect and wandering, may be underestimated in the cognitively-impaired population. In  
12 conclusion, better identification of these incidents among cognitively impaired seniors in the ED and  
13 hospital setting, as well as the circumstances under which they occurred, may help understand the  
14 cause of injuries and reduce the risk of further ones, as preventive measures may be put in place  
15 accordingly.  
16  
17  
18  
19  
20  
21  
22  
23  
24  
25

26 In total, 43 preventive measures were identified through this scoping review. Preventive measures  
27 mainly focused on environmental modifications (e.g. home and community physical environments,  
28 education to caregivers), modification of the person's habits (e.g. nutrition, medication, use of  
29 technical aids), government measures (e.g. safety programs with firefighters and the authorities,  
30 building regulations) and the involvement of a multidisciplinary team at the ED (e.g. pharmacist,  
31 occupational therapist, doctor). These interventions may represent a good starting point for Public  
32 Health Authorities around the world to implement safe and healthy environments. Not surprisingly,  
33 most interventions aimed to reduce falls among older adults ( $n = 19$ ), regardless of their cognitive  
34 level. Furthermore, only few preventive measures were tested and evaluated among the cognitively  
35 impaired population, and results were often poorer than those obtained with older adults without  
36 cognitive impairment [24,25,80]. In fact, no significant reduction was observed between the  
37 intervention group and the control group in terms of fall rates, ED presentations and hospitalizations  
38 [24,62] Potential preventive measures to reduce other types of incidents were also identified (e.g.  
39 home environment evaluation and modifications such as using current technologies like temperature  
40 controls to reduce the risk of burns in the bath, the recommendation to cease driving, education and  
41 supervision by caregivers to reduce self-negligence) [27,65,69,75] in older adults with cognitive  
42 impairment, but few were specifically tested in this sub-population. For most of the preventive  
43 measures, outcomes were also not described, which reduce their applicability in the clinical setting.  
44  
45  
46  
47  
48  
49  
50  
51  
52  
53  
54  
55  
56  
57  
58  
59  
60

1  
2  
3 As these incidents represented the first, second and third causes of ED presentation for this  
4 population, further studies should focus on the development and implementation of new preventive  
5 measures to reduce these incidents. This knowledge could then be used by stakeholders to make an  
6 informed decision to promote public health policies (e.g. home and road safety programs), healthcare  
7 services (e.g. workshops focussing on the prevention of avoidable incidents) and future research  
8 (orienting primary research and systematic review) in order to improve the well-being of this  
9 population and reduce avoidable costs associated with ED presentations and hospitalizations.

10  
11  
12 This study highlighted the need for primary studies, in the specific context of ED and for sub-groups  
13 of older adults with cognitive impairment. A systematic screening of the cognitive abilities and the  
14 circumstances around ED presentation through the use of a short screening tool, such as the Six-Item  
15 Screener (SIS) [90,91], or medical chart review, could help identify older adults with cognitive  
16 impairment. Implication of different actors in the screening process may also improve our  
17 understanding of avoidable incidents, circumstances of such incidents and case management. In  
18 Ontario (Canada), a pilot study was performed with paramedics to develop a screening tool to help  
19 identify the circumstances surrounding the incident leading to ED presentation, as well as associated  
20 risk factors in the person's environment [92]. Results were positive, and further studies are ongoing.  
21 Finally, coroner's files could be used to better understand the circumstances surrounding avoidable  
22 incidents leading to death, which are the more severe cases. In summary, further primary studies are  
23 required, and should involve many actors (e.g. occupational therapists, pharmacists) in the ED,  
24 considering the complexity and multifactorial nature of avoidable incidents.

25  
26  
27 Using a rigorous method, this scoping review provided the advantage of exploring a variety of  
28 sources from a multitude of databases (e.g. statistics, national and provincial health organizations,  
29 scientific databases). Covalidation of sources inclusion, data charting and analyses were also  
30 completed to ensure valid interpretation of results. The study has however some limitations. As  
31 previously mentioned, sources and causes of ED presentation and hospitalizations that may be  
32 associated with avoidable incidents (e.g. infections, medication side effects) were excluded from this  
33 scoping review. Prevalence of incidents for older adults, with and without cognitive impairment, may  
34 have been consequently underestimated. Considering the lack of knowledge concerning ED  
35 presentation and avoidable incidents, data and sources focussing on hospital medical services and  
36 mortality were included in this scoping review, and may affect our conclusions. Inclusion of these  
37  
38  
39  
40  
41  
42  
43  
44  
45  
46  
47  
48  
49  
50  
51  
52  
53  
54  
55  
56  
57  
58  
59  
60

sources allowed us to explore the severity of incidents, as well as more severe cases, an aspect that is rarely discussed in literature. Furthermore, distinction between older adults, with and without cognitive impairment, may vary between included sources, as cognitive abilities were not always assessed. Therefore, some sources may have categorized older adults with mild cognitive impairment or who are undiagnosed, as older adults without cognitive impairment. In accordance with the selected design, the quality of the studies was also not assessed [21], and some pertinent studies may not have been included in this scoping review. Consequently, our conclusion may have been affected by the biases of the included studies. Finally, the definition of ED presentation and the applicability of the study results may vary in different countries. This should be considered before using this knowledge in an identified healthcare system. Nonetheless, this study provides a better understanding of avoidable incidents leading older adults with cognitive impairment to ED presentation, demonstrates the need for primary research, and is a good starting point to identify preventive measures to implement with this population.

## CONCLUSION

This scoping review provided a detailed and comprehensive perspective of current knowledge regarding five types of avoidable incidents (falls, traffic accidents, burns, harm due to self-neglect, harm due to wandering) leading older adults, with and without cognitive impairment, to ED presentation and related hospitalizations, and the preventive measures that may be implemented to reduce these incidents. According to this review, falls, traffic accidents and burns emerged as the three main types of avoidable incidents for both sub-population. However, little is known about the circumstances in which the incidents occurred, and some (e.g. frostbite, dehydration) were not specifically discussed in the literature. Considering the lack of knowledge, future primary research should focus on the screening and documentation of the circumstances and cognitive abilities of older adults presenting to the ED by involving many actors. Furthermore, although many potential preventive measures were identified, only few were tested with older cognitively impaired adults. Consequently, though this scoping review aimed to reduce the rate of avoidable incidents leading to an ED presentation, too little information was available to identify the best measures to attain this objective. As a result, further studies are needed to test and implement preventive measures with this population, and consequently, to reduce further negative outcomes (i.e. prevalence of ED

1  
2  
3 presentations and hospitalizations related to avoidable incidents in cognitively impaired seniors, as  
4 well as their severity).  
5  
6  
7

## 8 **AUTHOR CONTRIBUTIONS**

9  
10 MGR and BH completed the literature review and the data extraction, assisted by two collaborators  
11 (Stéphanie Stocco and Annie-Claude Lemieux-Courchesne) and participated in the study design.  
12 MGR and BH analyzed and interpreted the results. MGR wrote the first draft of the manuscript with  
13 the help of BH. VP, NV, ME, MJS, and MG contributed to the study concept and design. Two  
14 collaborators (Kathy Rose and Francis Lacasse) were involved in the selection of relevant keywords  
15 and databases. The article was critically reviewed by NV, ME, MG, MJS and VP.  
16  
17  
18  
19  
20

## 21 **COMPETING INTERESTS**

22 None declared.  
23  
24

## 25 **FUNDING STATEMENT**

26 This work was supported by the Fonds de recherche du Québec (FRQ-S, no 34546) and the Faculty  
27 of Medicine and Health Sciences of the University of Sherbrooke. (UBR-706230).  
28  
29  
30

## 31 **DATA SHARING STATEMENT**

32 Not applicable.  
33  
34  
35

## 36 **FIGURE LEGENDS**

37  
38 Figure1:

39 Summary of evidence search and selection.

40 Selection process for studies to be included in the scoping review in compliance with PRISMA  
41 (Preferred Reporting Items for Systematic reviews and Meta-Analyses) standards.  
42  
43  
44

45  
46 Figure2:

47 Falls (the first bar at left) are the most commonly mentioned type of avoidable incidents (mentioned  
48 in 49 out of 67 total studies).  
49  
50  
51  
52  
53  
54  
55  
56  
57  
58  
59  
60

## REFERENCES

- 1 Canadian Institute for Health Information. Health Care in Canada 2011: A focus on Seniors and Aging. Ottawa: 2011. [https://secure.cihi.ca/free\\_products/HCIC\\_2011\\_seniors\\_report\\_en.pdf](https://secure.cihi.ca/free_products/HCIC_2011_seniors_report_en.pdf)
- 2 Sampson EL, Blanchard MR, Jones L, *et al.* Dementia in the acute hospital: prospective cohort study of prevalence and mortality. *Br J Psychiatry* 2009;**195**:61 LP-66.
- 3 Gray LC, Peel NM, Costa AP, *et al.* Profiles of Older Patients in the Emergency Department: Findings From the interRAI Multinational Emergency Department Study. *Ann Emerg Med* 2017;**62**:467–74. doi:10.1016/j.annemergmed.2013.05.008
- 4 Launay, C, Haubois, G, Hureaux-Huynh, R *et al.* [Older adults and emergency department: who is at risk of hospitalisation?] [Article in French]. *Geriatr Psychol Neuropsychiatr Vieil*
- 5 Clevenger CK, Chu TA, Yang Z, *et al.* Clinical Care of Persons with Dementia in the Emergency Department: A Review of the Literature and Agenda for Research. *J Am Geriatr Soc* 2012;**60**:1742–8. doi:10.1111/j.1532-5415.2012.04108.x
- 6 Sirois M-J, Émond M, Ouellet M-C, *et al.* Cumulative Incidence of Functional Decline After Minor Injuries in Previously Independent Older Canadian Individuals in the Emergency Department. *J Am Geriatr Soc* 2013;**61**:1661–8. doi:10.1111/jgs.12482
- 7 World Health Organisation. International Classification of Diseases (ICD-10), 2016. <http://apps.who.int/classifications/icd10/browse/2016/en#/T66-T78>.
- 8 Albert M, McCaig LF, Ashman JJ. Emergency department visits by persons aged 65 and over: United States, 2009-2010. Hyattsville: 2013. <http://www.ncbi.nlm.nih.gov/pubmed/24152709>
- 9 Ng W, Fujishima S, Suzuki M, *et al.* Characteristics of elderly patients presenting to the emergency department with injury. *Keio J Med* 2002;**51**:11–6. <http://www.ncbi.nlm.nih.gov/pubmed/11951373>
- 10 Canadian Institute for Health Information. Seniors' Use of Emergency Departments in Ontario. 2010. <https://secure.cihi.ca/estore/productFamily.htm?locale=en&pf=PFC1398&lang=en&media=0>
- 11 Ontario Injury Prevention Resource Centre. Injuries among Seniors in Ontario A Descriptive Analysis of Emergency Department and Hospitalization Data. 2007. [http://www.oninjuryresources.ca/downloads/publications/seniors\\_report.pdf](http://www.oninjuryresources.ca/downloads/publications/seniors_report.pdf)
- 12 Fischer BL, Gleason CE, Gangnon RE, *et al.* Declining cognition and falls: role of risky performance of everyday mobility activities. *Phys Ther* 2014;**94**:355–62. doi:10.2522/ptj.20130195
- 13 Tierney MC, Charles J, Naglie G, *et al.* Risk Factors for Harm in Cognitively Impaired Seniors Who Live Alone: A Prospective Study. *J Am Geriatr Soc* 2004;**52**:1435–41. doi:10.1111/j.0002-8614.2004.52404.x
- 14 Robitaille Y, Laforest S, Fournier M, *et al.* Moving Forward in Fall Prevention: An Intervention to Improve Balance Among Older Adults in Real-World Settings. *Am J Public Health* 2005;**95**:2049–56.



- 1  
2  
3 doi:10.2105/AJPH.2004.057612
- 4  
5 15 Nasvadi GE. Changes in self-reported driving behaviour following attendance at a mature driver  
6 education program. *Transp Res Part F Traffic Psychol Behav* 2007;**10**:358–69.  
7  
8 doi:http://dx.doi.org/10.1016/j.trf.2007.02.001
- 9  
10 16 Division of Aging and Seniors. An Inventory of Canadian Programs for the Prevention of Falls Among  
11 Seniors Living in the Community. Ottawa: 2001.
- 12  
13 17 Robitaille Y, Laforest S, Fournier M, *et al*. Moving Forward in Fall Prevention: An Intervention to  
14 Improve Balance Among Older Adults in Real-World Settings. *Am J Public Health* 2005;**95**:2049–56.  
15  
16 doi:10.2105/AJPH.2004.057612
- 17  
18 18 Nasvadi GE. Changes in self-reported driving behaviour following attendance at a mature driver  
19 education program. *Transp Res Part F Traffic Psychol Behav* 2007;**10**:358–69.  
20  
21 doi:http://dx.doi.org/10.1016/j.trf.2007.02.001
- 22  
23 19 Levac D, Colquhoun H, O'Brien KK. Scoping studies: advancing the methodology. *Implement Sci*  
24 2010;**5**:69. doi:10.1186/1748-5908-5-69
- 25  
26 20 Arksey H, O'Malley L. Scoping studies: towards a methodological framework. *Int J Soc Res Methodol*  
27 2005;**8**:19–32. doi:10.1080/1364557032000119616
- 28  
29 21 Provencher V, Généreux M, Gagnon-Roy M, *et al*. Preventing avoidable incidents leading to a  
30 presentation to the emergency department (ED) by older adults with cognitive impairment: protocol for  
31 a scoping review. *BMJ Open* 2016;**6**.http://bmjopen.bmj.com/content/6/2/e009818.abstract
- 32  
33 22 World Health Organisation. International Classification of Diseases (ICD-10), 2016.
- 34  
35 23 L'écuyer R. *Méthodologie de l'analyse développementale de contenu. Méthode GPS et concept de soi*.  
36 Québec: : Presses de l'Université du Québec 1990.
- 37  
38 24 Shaw F., Bond J, Richardson D., *et al*. Multifactorial intervention after a fall in older people with  
39 cognitive impairment and dementia presenting to the accident and emergency department: randomised  
40 controlled trial. *BMJ* 2003;**326**:73–73. doi:10.1136/bmj.326.7380.73
- 41  
42 25 Shaw FE. Falls in Older People With Dementia. *Geriatr aging* 2003;**6**:37–40.
- 43  
44 26 Gagnon C, Lafrance M. Prévention des chutes auprès des personnes âgées vivant à domicile :  
45 recommandations préliminaire à l'élaboration d'un guide de pratique clinique. 2011;:235.
- 46  
47 27 Public Health Agency of Canada. The Safe Living Guide—A Guide to Home Safety for Seniors.  
48 2011.http://www.phac-aspc.gc.ca/seniors-aines/publications/public/injury-blessure/safelive-  
49 securite/index-eng.php
- 50  
51  
52 28 Raina P, Torrance V, Lindsay J. *A review of the literature and an analysis of mortality and*  
53 *hospitalisation data to examine patterns of injuries among Canadian seniors*. 1997.
- 54  
55 29 Public health agency of Canada. If You Fall or Witness a Fall, Do You Know What to Do?  
56  
57  
58  
59  
60

- 2008.<http://www.phac-aspc.gc.ca/seniors-aines/publications/public/injury-blessure/falls-chutes/index-fra.php>
- 30 Owens PL, Russo CA, Spector W, *et al.* *Emergency Department Visits for Injurious Falls among the Elderly, 2006: Statistical Brief #80.* 2006. <http://www.ncbi.nlm.nih.gov/pubmed/21452495>
- 31 Kara H, Bayir A, Ak A, *et al.* Trauma in elderly patients evaluated in a hospital emergency department in Konya, Turkey: a retrospective study. *Clin Interv Aging* 2013;:17. doi:10.2147/CIA.S56542
- 32 Marques de Abrantes KS, Nobre de Menezes T, Andrade Duarte de Farias M do C, *et al.* Trauma in elderly people attended by a mobile emergency service. *Int Arch Med* Published Online First: 2015. doi:10.3823/1679
- 33 Centers for Disease Control and Prevention. Older Adult Falls: Get the Facts. 2015.<http://www.cdc.gov/homeandrecreationalsafety/falls/adultfalls.html>
- 34 Public Health Agency of Canada. Report on seniors' falls in Canada. 2005. <http://www.publications.gc.ca/pub?id=9.649855&sl=0>
- 35 Lee VM, Wong TW, Lau CC. Home accidents in elderly patients presenting to an emergency department. *Accid Emerg Nurs* 1999;7:96–102.<http://www.ncbi.nlm.nih.gov/pubmed/10578721>
- 36 Yeo YYC, Lee SK, Lim CY, *et al.* A review of elderly injuries seen in a Singapore emergency department. *Singapore Med J* 2009;50:278–83.<http://www.ncbi.nlm.nih.gov/pubmed/19352571>
- 37 Aschkenasy MT, Rothenhaus TC. Trauma and falls in the elderly. *Emerg Med Clin North Am* 2006;24:413–32, vii. doi:10.1016/j.emc.2006.01.005
- 38 Lee J, Sirois M-J, Moore L, *et al.* Return to the ED and hospitalisation following minor injuries among older persons treated in the emergency department: predictors among independent seniors within 6 months. *Age Ageing* 2015;44:624–9. doi:10.1093/ageing/afv054
- 39 Amador S, Goodman C, King D, *et al.* Emergency ambulance service involvement with residential care homes in the support of older people with dementia: an observational study. *BMC Geriatr* 2014;14:95. doi:10.1186/1471-2318-14-95
- 40 Burns E. Older people in accidents and emergency departments. *Age Ageing* 2001;30:3–6.
- 41 Ziminski CE, Phillips LR, Woods DL. Raising the index of suspicion for elder abuse: cognitive impairment, falls, and injury patterns in the emergency department. *Geriatr Nurs* 2012;33:105–12. doi:10.1016/j.gerinurse.2011.12.003
- 42 Public Health Agency of Canada. Seniors' Falls in Canada: Second Report. 2014. [http://www.phac-aspc.gc.ca/seniors-aines/publications/public/injury-blessure/seniors\\_falls-chutes\\_aines/index-eng.php](http://www.phac-aspc.gc.ca/seniors-aines/publications/public/injury-blessure/seniors_falls-chutes_aines/index-eng.php)
- 43 Whiteman C, Tillotson R, Denne N, *et al.* Major trauma in West Virginia dementia patients injury patterns, discharge dispositions and implications for treatment and injury prevention. *WV Med J* 2011;107:48–52.<http://www.ncbi.nlm.nih.gov/pubmed/21702416>



- 1  
2  
3 44 Nourhashémi F, Andrieu S, Sastres N, *et al.* Descriptive analysis of emergency hospital admissions of  
4 patients with Alzheimer disease. *Alzheimer Dis Assoc Disord* 2001;**15**:21–5.
- 5  
6 45 Voisin T, Sourdet S, Cantet C, *et al.* Descriptive analysis of hospitalizations of patients with  
7 Alzheimer’s disease: a two-year prospective study of 686 patients from the REAL.FR study. *J Nutr*  
8 *Health Aging* 2009;**13**:890–2. doi:10.1007/s12603-009-0247-y
- 9  
10  
11 46 Ministry of health of B.C. Canada. The Evolution of Seniors’ Falls Prevention in British Columbia;  
12 Working strategically and collectively to reduce the burden and impact of falls and fall-related injury  
13 among seniors. 2006. [http://www.health.gov.bc.ca/library/publications/year/2006/falls\\_report.pdf](http://www.health.gov.bc.ca/library/publications/year/2006/falls_report.pdf)
- 14  
15 47 Kihlgren A, Wimo A, Mamhidir A-G. Older patients referred by community nurses to emergency  
16 departments--a descriptive cross-sectional follow-up study in a Swedish context. *Scand J Caring Sci*  
17 2014;**28**:97–103. doi:10.1111/scs.12044
- 18  
19  
20 48 Pfortmueller CA, Kunz M, Lindner G, *et al.* Fall-Related Emergency Department Admission: Fall  
21 Environment and Settings and Related Injury Patterns in 6357 Patients with Special Emphasis on the  
22 Elderly. *Sci World J* 2014;**2014**:1–6. doi:10.1155/2014/256519
- 23  
24  
25 49 Timler D, Dworzyński MJ, Szarpak Ł, *et al.* Head Trauma in Elderly Patients: Mechanisms of Injuries  
26 and CT Findings. *Adv Clin Exp Med* 2015;**24**:1045–50. <http://www.ncbi.nlm.nih.gov/pubmed/26771978>
- 27  
28 50 Ministry of health planning Office of the Provincial Health Officer British Columbia. Prevention of  
29 falls and injuries among the elderly : a special report from the Office of the Provincial Health Planning.  
30 2004. <http://www.health.gov.bc.ca/library/publications/year/2004/falls.pdf>
- 31  
32  
33 51 Department of Health Promotion and Protection. Preventing Fall-Related Injuries Among Older Nova  
34 Scotians : A Strategic Framework. 2007.
- 35  
36 52 Gyllencreutz L, Björnstig J, Rolfsman E, *et al.* Outdoor pedestrian fall-related injuries among Swedish  
37 senior citizens - injuries and preventive strategies. *Scand J Caring Sci* 2015;**29**:225–33.  
38 doi:10.1111/scs.12153
- 39  
40  
41 53 Wilkins K, Park E. Injuries. *Heal Reports, Stat Canada, Cat 82-003* 2004;**15**:43–8.
- 42  
43 54 Douglas A, Letts L, Richardson J. A systematic review of accidental injury from fire, wandering and  
44 medication self-administration errors for older adults with and without dementia. *Arch Gerontol Geriatr*  
45 2011;**52**:e1–10. doi:10.1016/j.archger.2010.02.014
- 46  
47 55 Taylor ME, Delbaere K, Lord SR, *et al.* Neuropsychological, physical, and functional mobility  
48 measures associated with falls in cognitively impaired older adults. *J Gerontol A Biol Sci Med Sci*  
49 2014;**69**:987–95. doi:10.1093/gerona/glt166
- 50  
51  
52 56 Paniagua MA, Malphurs JE, Phelan EA. Older patients presenting to a county hospital ED after a fall:  
53 missed opportunities for prevention. *Am J Emerg Med* 2006;**24**:413–7. doi:10.1016/j.ajem.2005.12.005
- 54  
55 57 Ouellet M-C, Sirois M-J, Beaulieu-Bonneau S, *et al.* Correlates of cognitive functioning in independent  
56  
57  
58  
59

- 1  
2  
3 elderly patients discharged home from the emergency department after a minor injury. *Int*  
4 *psychogeriatrics* 2016;**28**:1313–22. doi:10.1017/S104161021600065X
- 58 Welmerink DB, Longstreth WT, Lyles MF, *et al.* Cognition and the Risk of Hospitalization for Serious  
7 Falls in the Elderly: Results From the Cardiovascular Health Study. *Journals Gerontol Ser A Biol Sci*  
8 *Med Sci* 2010;**65A**:1242–9. doi:10.1093/gerona/glq115
- 59 Taylor ME, Lord SR, Brodaty H, *et al.* A home-based, carer-enhanced exercise program improves  
12 balance and falls efficacy in community-dwelling older people with dementia. *Int psychogeriatrics*  
13 2017;**29**:81–91. doi:10.1017/S1041610216001629
- 60 National Institute on Aging. Falls and Fractures. 2009. <https://www.nia.nih.gov/health/publication/falls-and-fractures>
- 61 Beaudoin FL, Merchant RC, Clark MA. Prevalence and Detection of Prescription Opioid Misuse and  
20 Prescription Opioid Use Disorder Among Emergency Department Patients 50 Years of Age and Older:  
21 Performance of the Prescription Drug Use Questionnaire, Patient Version. *Am J Geriatr Psychiatry*  
22 2016;**24**:627–36. doi:10.1016/j.jagp.2016.03.010
- 62 Mahoney JE, Shea TA, Przybelski R, *et al.* Kenosha County falls prevention study: a randomized,  
26 controlled trial of an intermediate-intensity, community-based multifactorial falls intervention. *J Am*  
27 *Geriatr Soc* 2007;**55**:489–98. doi:10.1111/j.1532-5415.2007.01144.x
- 63 National Institute on Aging. Driving and dementia: Health professionals can play important role.  
31 2002. [https://www.nia.nih.gov/alzheimers/features/driving-and-dementia-health-professionals-can-play-](https://www.nia.nih.gov/alzheimers/features/driving-and-dementia-health-professionals-can-play-important-role)  
32 *important-role*
- 64 Alden NE, Rabbitts A, Yurt RW. Burn injury in patients with dementia: an impetus for prevention. *J*  
36 *Burn Care Rehabil* 2005;**26**:267–71. <http://www.ncbi.nlm.nih.gov/pubmed/15879750>
- 65 Ehrlich AR, Kathpalia S, Boyarsky Y, *et al.* Elderly patients discharged home from the emergency  
39 department with minor burns. *Burns* 2005;**31**:717–20. doi:10.1016/j.burns.2004.12.008
- 66 Lowton K, Laybourne AH, Whiting DG, *et al.* Can Fire and Rescue Services and the National Health  
42 Service work together to improve the safety and wellbeing of vulnerable older people? Design of a  
43 proof of concept study. *BMC Health Serv Res* 2010;**10**:327. doi:10.1186/1472-6963-10-327
- 67 Lester PE, Kohen I. Smoking in the nursing home: a case report and literature review. *J Am Med Dir*  
47 *Assoc* 2008;**9**:201–3. doi:10.1016/j.jamda.2007.09.002
- 68 Elder AT, Squires T, Busuttill A. Fire fatalities in elderly people. *Age Ageing* 1996;**25**:214–  
50 6. <http://www.ncbi.nlm.nih.gov/pubmed/8670555>
- 69 Tierney MC, Snow WG, Charles J, *et al.* Neuropsychological Predictors of Self-Neglect in Cognitively  
53 Impaired Older People Who Live Alone. *Am J Geriatr Psychiatry* 2007;**15**:140–8.  
54 doi:10.1097/01.JGP.0000230661.32735.c0

- 1  
2  
3 70 Charles J, Naglie G, Lee J, *et al*. Self-report measures of well-being predict incident harm due to self-  
4 neglect in cognitively impaired seniors who live alone. *J Alzheimers Dis* 2015;**44**:425–30.  
5 doi:10.3233/JAD-141671  
6  
7  
8 71 Barat I, Andreasen F, Damsgaard EMS. Drug therapy in the elderly: what doctors believe and patients  
9 actually do. *Br J Clin Pharmacol* 2001;**51**:615–22. doi:10.1046/j.0306-5251.2001.01401.x  
10  
11 72 Canadian Institute for Health Information. Hospitalizations and Emergency Department Visits Due to  
12 Opioid Poisoning in Canada. 2016. [https://secure.cihi.ca/free\\_products/Opioid Poisoning Report](https://secure.cihi.ca/free_products/Opioid_Poisoning_Report_EN.pdf)  
13 EN.pdf  
14  
15 73 Tierney MC, Charles J, Jaglal S, *et al*. Identification of Those at Greatest Risk of Harm Among  
16 Cognitively Impaired People Who Live Alone. *Aging, Neuropsychol Cogn (Neuropsychology, Dev*  
17 *Cogn Sect B)* 2001;**8**:182–91. doi:10.1076/anec.8.3.182.829  
18  
19 74 Rowe MA, Feinglass NG, Wiss ME. Persons with dementia who become lost in the community: a case  
20 study, current research, and recommendations. *Mayo Clin Proc* 2004;**79**:1417–22.  
21 doi:10.4065/79.11.1417  
22  
23 75 Dalsania P. Dementia Dashboard: A Proactive Risk Reduction Management Guideline. *Top Geriatr*  
24 *Rehabil* 2006;**22**:228–42.  
25  
26 76 Taylor ME, Delbaere K, Close JC, *et al*. Managing falls in older patients with cognitive impairment.  
27 *Aging health* 2012;**8**:573–88. doi:10.2217/ahe.12.68  
28  
29 77 Al-Aama T, Tareef A-A. Falls in the elderly : Spectrum and prevention. *Can Fam physician*  
30 2011;**57**:771–6.  
31  
32 78 Institut national de santé publique du Québec. Prévenir les chutes chez les aînés vivant à domicile:  
33 Volet soutien à domicile-Intervention multifactorielle personnalisée [IMP]. 2017.  
34  
35 79 Fuller GF. Falls in the Elderly. *Am Fam Physician* 2000;**61**:2159–68.  
36  
37 80 Booth V, Logan P, Harwood R, *et al*. Falls prevention interventions in older adults with cognitive  
38 impairment: A systematic review of reviews. *Int J Ther Rehabil* 2015;**22**:289–96.  
39 doi:10.12968/ijtr.2015.22.6.289  
40  
41 81 Rapp K, Lamb SE, Büchele G, *et al*. Prevention of Falls in Nursing Homes: Subgroup Analyses of a  
42 Randomized Fall Prevention Trial. *J Am Geriatr Soc* 2008;**56**:1092–7. doi:10.1111/j.1532-  
43 5415.2008.01739.x  
44  
45 82 Canadian Institute for Health Information. Sources of Potentially Avoidable Emergency Department  
46 Visits. 2014. [https://secure.cihi.ca/free\\_products/ED\\_Report\\_ForWeb\\_EN\\_Final.pdf](https://secure.cihi.ca/free_products/ED_Report_ForWeb_EN_Final.pdf)  
47  
48 83 Alldred DP, Raynor DK, Hughes C, *et al*. Interventions to optimise prescribing for older people in care  
49 homes. In: Alldred DP, ed. *Cochrane Database of Systematic Reviews*. Chichester, UK: : John Wiley &  
50 Sons, Ltd 2013. doi:10.1002/14651858.CD009095.pub2  
51  
52  
53  
54  
55  
56  
57  
58  
59  
60

- 1  
2  
3 84 Carpenter CR, Avidan MS, Wildes T, *et al.* Predicting geriatric falls following an episode of emergency  
4 department care: a systematic review. *Acad Emerg Med* 2014;**21**:1069–82. doi:10.1111/acem.12488  
5  
6 85 Canada PHA of, Public Health Agency of Canada. The National Blueprint for Injury Prevention in  
7 Older Drivers. 2009.  
8  
9 86 Valcour VG, Masaki KH, Blanchette PL. Self-Reported Driving, Cognitive Status, and Physician  
10 Awareness of Cognitive Impairment. *J Am Geriatr Soc* 2002;**50**:1265–7. doi:10.1046/j.1532-  
11 5415.2002.50314.x  
12  
13  
14 87 Lafont S, Laumon B, Helmer C, *et al.* Driving Cessation and Self-Reported Car Crashes in Older  
15 Drivers: The Impact of Cognitive Impairment and Dementia in a Population-Based Study. *J Geriatr*  
16 *Psychiatry Neurol* 2008;**21**:171–82. doi:10.1177/0891988708316861  
17  
18 88 Frittelli C, Borghetti D, Iudice G, *et al.* Effects of Alzheimer’s disease and mild cognitive impairment  
19 on driving ability: a controlled clinical study by simulated driving test. *Int J Geriatr Psychiatry*  
20 2009;**24**:232–8. doi:10.1002/gps.2095  
21  
22  
23 89 Withaar FK, Brouwer WH, Van Zomeren AH. Fitness to drive in older drivers with cognitive  
24 impairment. *J Int Neuropsychol Soc* 2000;**6**:480–90. doi:DOI: undefined  
25  
26 90 Wilber ST, Lofgren SD, Mager TG, *et al.* An Evaluation of Two Screening Tools for Cognitive  
27 Impairment in Older Emergency Department Patients. *Acad Emerg Med* 2005;**12**:612–6.  
28 doi:10.1197/j.aem.2005.01.017  
29  
30  
31 91 Carpenter CR, DesPain B, Keeling TN, *et al.* The Six-Item Screener and AD8 for the Detection of  
32 Cognitive Impairment in Geriatric Emergency Department Patients. *Ann Emerg Med* 2011;**57**:653–61.  
33 doi:http://dx.doi.org/10.1016/j.annemergmed.2010.06.560  
34  
35  
36 92 Lee JS, Verbeek PR, Schull MJ, *et al.* Paramedics assessing Elders at Risk for Independence Loss  
37 (PERIL): Derivation, Reliability and Comparative Effectiveness of a Clinical Prediction Rule. *CJEM*  
38 2016;**18**:121–32. doi:DOI: 10.1017/cem.2016.14  
39  
40  
41  
42  
43  
44  
45  
46  
47  
48  
49  
50  
51  
52  
53  
54  
55  
56  
57  
58  
59  
60

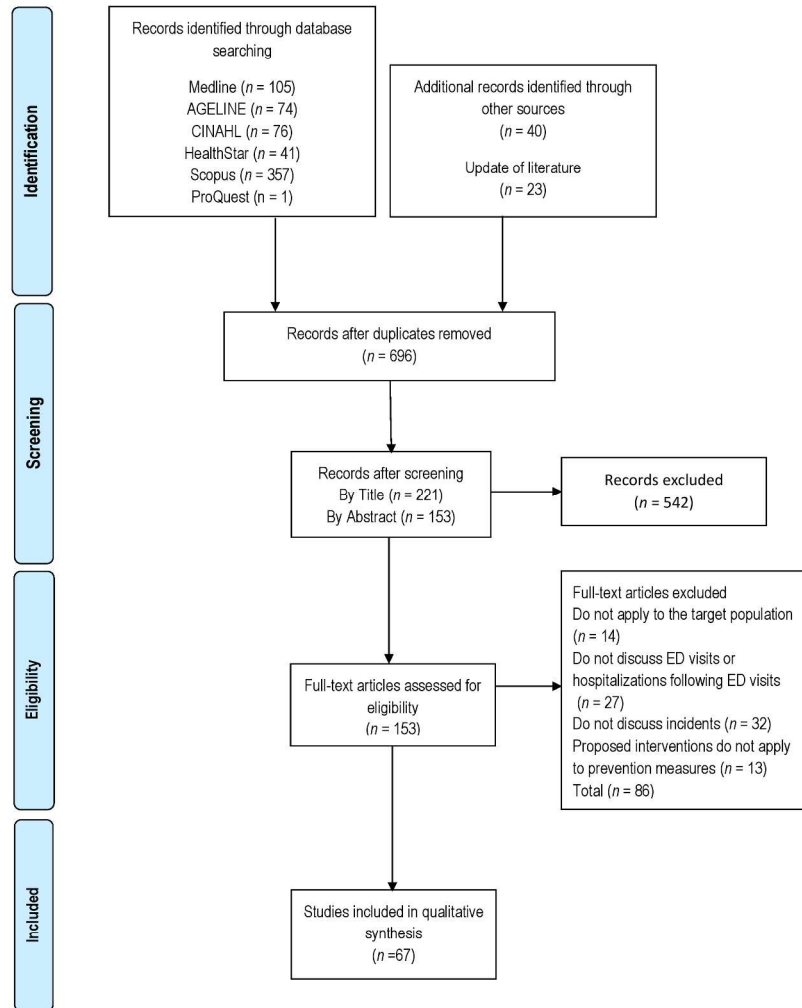

Figure 1. PRISMA FLOW CHART of the scoping review

Summary of evidence search and selection.  
 Selection process for studies to be included in the scoping review in compliance with PRISMA (Preferred Reporting Items for Systematic reviews and Meta-Analyses) standards.

215x279mm (300 x 300 DPI)

1  
2  
3  
4  
5  
6  
7  
8  
9  
10  
11  
12  
13  
14  
15  
16  
17  
18  
19  
20  
21  
22  
23  
24  
25  
26  
27  
28  
29  
30  
31  
32  
33  
34  
35  
36  
37  
38  
39  
40  
41  
42  
43  
44  
45  
46  
47  
48  
49  
50  
51  
52  
53  
54  
55  
56  
57  
58  
59  
60

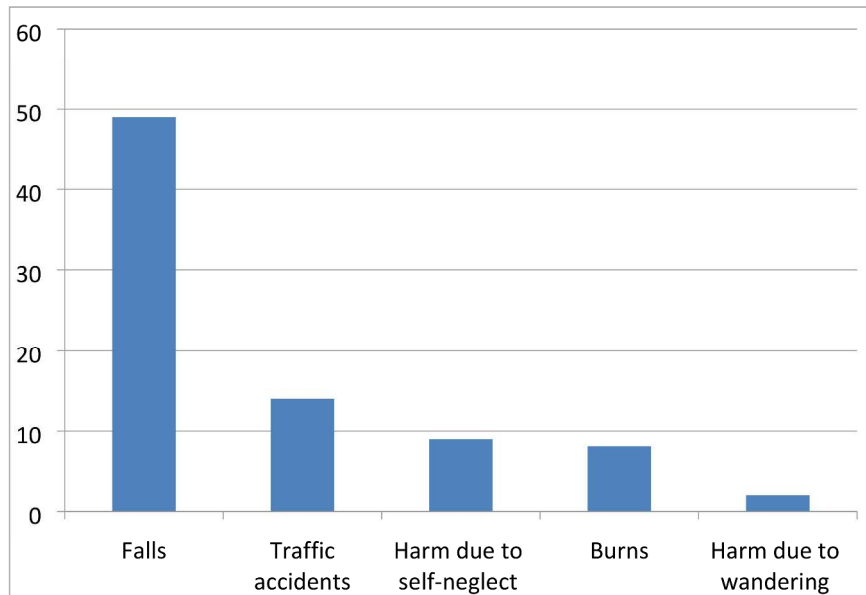

**Figure 2.** Number of studies mentioning avoidable incidents

Falls (the first bar at left) are the most commonly mentioned type of avoidable incidents (mentioned in 49 out of 67 total studies).

279x215mm (300 x 300 DPI)

View only

## Supplementary files. The studies included in the scoping review

| Authors                                        | Year of publication | Country | Study design      | Setting* | Types of incidents** | Participants |             |      |                                                                                                                                          |                                                                                                                                                                              |
|------------------------------------------------|---------------------|---------|-------------------|----------|----------------------|--------------|-------------|------|------------------------------------------------------------------------------------------------------------------------------------------|------------------------------------------------------------------------------------------------------------------------------------------------------------------------------|
|                                                |                     |         |                   |          |                      | CI***        | Sample size | Age  | Inclusion criteria                                                                                                                       | Exclusion criteria                                                                                                                                                           |
| Albert M, McCaig L, Ashman J [8]               | 2013                | USA     | Statistics        | ED       | F                    | No           | -           | ≥ 65 | -                                                                                                                                        | -                                                                                                                                                                            |
| Ng W et al. [9]                                | 2002                | Japan   | Descriptive study | ED       | TA+B                 | No           | 813         | ≥ 65 | • Cases of injury-related presentations in the elderly group.                                                                            |                                                                                                                                                                              |
| Canadian Institute for Health Information [10] | 2010                | Canada  | Statistics        | ED       | General              | No           | -           | ≥ 65 | • Ontario residents with an unplanned visit to the Emergency Department.                                                                 |                                                                                                                                                                              |
| Ontario Injury Prevention Resource Centre [11] | 2007                | Canada  | Statistics        | ED       | F+TA                 | No           | -           | ≥ 65 | • Visiting an Emergency Department; or<br>• Admitted to an acute care hospital.                                                          |                                                                                                                                                                              |
| Tierney M, Charles J, Naglie G et al. [13]     | 2004                | Canada  | Descriptive study | C        | SN                   | Yes          | 139         | ≥ 65 | • Living alone;<br>• Urban-dwelling.                                                                                                     | • History of bipolar disorder or schizophrenia.                                                                                                                              |
| Shaw FE, Bond J, Richardson DA, et al. [24]    | 2003                | UK      | Empirical study   | ED       | F                    | Yes          | 274         | ≥ 65 | • Cognitive impairment and dementia (Mini-MentalState Examination score < 24);<br>• Presenting to the Emergency Department after a fall. | • Medical diagnosis that likely caused the fall;<br>• Unfitness for investigation within 4 months;<br>• Inability to walk or to communicate for reasons other than dementia. |
| Shaw F [25]                                    | 2003                | UK      | Author's opinion  | C        | F                    | Yes          | -           | ≥ 65 | -                                                                                                                                        | -                                                                                                                                                                            |
| Gagnon C, Lafrance M [26]                      | 2011                | Canada  | Literature review | C        | F                    | No           | -           | ≥ 65 | -                                                                                                                                        | -                                                                                                                                                                            |
| Public Health Agency of Canada [27]            | 2011                | Canada  | Grey literature   | C        | F                    | No           | -           | ≥ 65 | -                                                                                                                                        | -                                                                                                                                                                            |
| Raina P et al. [28]                            | 1997                | Canada  | Literature review | H        | F+TA                 | No           | -           | ≥ 65 | -                                                                                                                                        | -                                                                                                                                                                            |
| Public health agency of Canada [29]            | 2008                | Canada  | Grey literature   | C        | F                    | No           | -           | ≥ 65 | -                                                                                                                                        | -                                                                                                                                                                            |

## Supplementary files. The studies included in the scoping review

| Authors                                         | Year of publication | Country   | Study design      | Setting* | Types of incidents** | Participants |             |      |                                                                                                                                    |                                                                                           |
|-------------------------------------------------|---------------------|-----------|-------------------|----------|----------------------|--------------|-------------|------|------------------------------------------------------------------------------------------------------------------------------------|-------------------------------------------------------------------------------------------|
|                                                 |                     |           |                   |          |                      | CJ***        | Sample size | Age  | Inclusion criteria                                                                                                                 | Exclusion criteria                                                                        |
| Owens P, Russo C, Spector W et al. [30]         | 2009                | USA       | Statistics        | ED       | F                    | No           | -           | ≥ 65 | -                                                                                                                                  | -                                                                                         |
| Centers for Disease Control and Prevention [31] | 2015                | USA       | Grey literature   | C        | F                    | No           | -           | ≥ 65 | -                                                                                                                                  | -                                                                                         |
| Abrantes K et al. [32]                          | 2015                | Brazil    | Descriptive study | ED       | F+TA                 | No           | 190         | ≥ 65 | • Victims of some type of trauma (urban and rural);<br>• Served by the Mobile Emergency Service team.                              | -                                                                                         |
| Kara H, Bayir A, Ak A et al. [33]               | 2013                | Turkey    | Descriptive study | ED       | F+TA                 | No           | 568         | ≥ 65 | • Admitted to an Emergency Department of a tertiary care hospital.                                                                 | -                                                                                         |
| Public Health Agency of Canada [34]             | 2005                | Canada    | Grey literature   | C        | F                    | No           | -           | ≥ 65 | -                                                                                                                                  | -                                                                                         |
| Lee V, Wong T, Lau C [35]                       | 1999                | Hong Kong | Descriptive study | ED       | F+TA+B               | No           | 100         | ≥ 65 | • History of accidental injury at home within one week.                                                                            | -                                                                                         |
| Yeo Y, Lee S, Lim C et al. [36]                 | 2009                | Singapore | Descriptive study | ED       | F+TA                 | No           | 720         | ≥ 65 | • Visiting the Emergency Department                                                                                                | • Immediate resuscitation;<br>• Mental illness or violent behavior.                       |
| Aschkenasy M, Rothenhaus T [37]                 | 2006                | USA       | Literature review | C        | F+TA                 | No           | -           | ≥ 65 | -                                                                                                                                  | -                                                                                         |
| Lee J, Sirois M, Moore L et al. [38]            | 2015                | Canada    | Descriptive study | ED       | F+TA                 | Yes          | 1.286       | ≥ 65 | • Independently perform the seven basic activities of daily living;<br>• Emergency Department patients;<br>• Discharged back home. | -                                                                                         |
| Amador S, Goodman C, King D et al. [39]         | 2014                | UK        | Descriptive study | C        | F                    | Yes          | 133         | ≥ 65 | • Documented diagnosis of dementia; or<br>• Validated measure of cognitive function impairment.                                    | • Admitted to hospital;<br>• From long-term care facilities;<br>• Unable to give consent. |
| Burns E [40]                                    | 2001                | USA       | Literature review | ED       | F                    | No           | -           | ≥ 65 | -                                                                                                                                  | • Lacked capacity to consent;<br>• A consultee could not be identified                    |
| Ziminski C, Phillips L, Woods D [41]            | 2012                | USA       | Descriptive study | ED       | F                    | Yes          | 18344       | ≥ 65 | -                                                                                                                                  | -                                                                                         |
| Public Health Agency of Canada [42]             | 2014                | Canada    | Grey literature   | C        | F                    | No           | -           | ≥ 65 | -                                                                                                                                  | -                                                                                         |



## Supplementary files. The studies included in the scoping review

| Authors                                                                                     | Year of publication | Country     | Study design      | Setting* | Types of incidents** | Participants |             |            |                                                                                                                                                                                                                      |                                                                                                                                                                                                         |
|---------------------------------------------------------------------------------------------|---------------------|-------------|-------------------|----------|----------------------|--------------|-------------|------------|----------------------------------------------------------------------------------------------------------------------------------------------------------------------------------------------------------------------|---------------------------------------------------------------------------------------------------------------------------------------------------------------------------------------------------------|
|                                                                                             |                     |             |                   |          |                      | CJ***        | Sample size | Age        | Inclusion criteria                                                                                                                                                                                                   | Exclusion criteria                                                                                                                                                                                      |
| Whiteman C, Tillotson R, Denne N et al. [43]                                                | 2011                | USA         | Descriptive study | ED       | F+TA                 | Yes          | 6,151       | ≥ 40       | <ul style="list-style-type: none"> <li>• Dementia and non-dementia group;</li> <li>• Presented for a major trauma visit.</li> </ul>                                                                                  | -                                                                                                                                                                                                       |
| Nourhashémi F, Andrieu S, Sastres N et al. [44]                                             | 2001                | France      | Descriptive study | ED       | F                    | Yes          | 118         | ≥ 60       | <ul style="list-style-type: none"> <li>• Patients with Alzheimer' disease</li> </ul>                                                                                                                                 |                                                                                                                                                                                                         |
| Voisin T, Sourdet S, Cantet C et al. [45]                                                   | 2009                | France      | Descriptive study | H        | F                    | Yes          | 686         | ≥ 60       | <ul style="list-style-type: none"> <li>• Alzheimer's disease;</li> <li>• Mild to moderate disease;</li> <li>• Mini- Mental State Examination score between 10 and 26;</li> <li>• Living in the community.</li> </ul> | <ul style="list-style-type: none"> <li>• Severe Alzheimer's disease;</li> <li>• Institutionalized at baseline;</li> <li>• A concomitant disorder that could affect the short-term prognosis.</li> </ul> |
| Ministry of Health (British Columbia, Canada) [46]                                          | 2006                | Canada      | Grey literature   | C        | F                    | No           | -           | ≥ 65       | -                                                                                                                                                                                                                    | <ul style="list-style-type: none"> <li>• Confusional syndromes or slight or moderate cognitive disorders.</li> </ul>                                                                                    |
| Kihlgren A, Wimo A, Mamhidir A [47]                                                         | 2014                | Sweden      | Descriptive study | C        | F                    | No           | 719         | ≥ 75       | <ul style="list-style-type: none"> <li>• Living permanently in a nursing home.</li> </ul>                                                                                                                            |                                                                                                                                                                                                         |
| Pfortmueller C, Kunz M, Lindner G et al. [48]                                               | 2014                | Switzerland | Descriptive study | ED       | F                    | No           | 6357        | ≥16<br>≥75 | <ul style="list-style-type: none"> <li>• Admitted to the Emergency Department in relation to a fall.</li> </ul>                                                                                                      |                                                                                                                                                                                                         |
| Timler D, Dworzyński M, Szarpak Ł et al. [49]                                               | 2015                | Poland      | Descriptive study | ED       | F                    | No           | 301         | ≥ 65       | <ul style="list-style-type: none"> <li>• Patients whose diagnoses were coded with ICD-10 (International Statistical Classification of Diseases) codes S00–S09 which pertain to injuries of the head.</li> </ul>      |                                                                                                                                                                                                         |
| Ministry of health planning, Office of the Provincial Health Officer, British Columbia [50] | 2004                | Canada      | Grey literature   | C        | F                    | No           | 4066        | ≥ 65       | <ul style="list-style-type: none"> <li>• Treated and released in the Emergency Department</li> </ul>                                                                                                                 |                                                                                                                                                                                                         |
| Department of Health Promotion and Protection [51]                                          | 2007                | Canada      | Grey literature   | C        | F                    | No           | -           | ≥ 65       | -                                                                                                                                                                                                                    | <ul style="list-style-type: none"> <li>• Admitted to hospital for further treatment of their injuries.</li> </ul>                                                                                       |
| Gyllencreutz L, Björnstig J, Rolfman E et al. [52]                                          | 2015                | Sweden      | Descriptive study | C        | F                    | No           | 216         | ≥ 65       | <ul style="list-style-type: none"> <li>• Fall as a pedestrian in a public area.</li> </ul>                                                                                                                           |                                                                                                                                                                                                         |

## Supplementary files. The studies included in the scoping review

| Authors                                             | Year of publication | Country   | Study design      | Setting* | Types of incidents** | Participants |              |      |                                                                                                                                                                                                                                                                                                                                 |                                                                                                                                                                                                             |
|-----------------------------------------------------|---------------------|-----------|-------------------|----------|----------------------|--------------|--------------|------|---------------------------------------------------------------------------------------------------------------------------------------------------------------------------------------------------------------------------------------------------------------------------------------------------------------------------------|-------------------------------------------------------------------------------------------------------------------------------------------------------------------------------------------------------------|
|                                                     |                     |           |                   |          |                      | CJ***        | Sample size  | Age  | Inclusion criteria                                                                                                                                                                                                                                                                                                              | Exclusion criteria                                                                                                                                                                                          |
| Wilkins K, Park E [53]                              | 2004                | Canada    | Grey literature   | C        | F                    | No           | Older adults | ≥ 65 | -                                                                                                                                                                                                                                                                                                                               | -                                                                                                                                                                                                           |
| Douglas A, Letts L, Richardson J [54]               | 2011                | Canada    | Literature review | C        | F+B+SN+W             | Yes          | 16 sources   | ≥ 65 | -                                                                                                                                                                                                                                                                                                                               | -                                                                                                                                                                                                           |
| Taylor M, Delbaere K, Lord S et al. [55]            | 2014                | Australia | Descriptive study | C        | F                    | Yes          | 174          | ≥ 60 | <ul style="list-style-type: none"> <li>• Cognitive impairment;</li> <li>• Living in the community or a low-level care facility.</li> </ul>                                                                                                                                                                                      |                                                                                                                                                                                                             |
| Paniagua M, Malphurs J, Phelan E [56]               | 2006                | USA       | Descriptive study | ED       | F                    | No           | 117          | ≥ 65 | <ul style="list-style-type: none"> <li>• Presenting to the Emergency Department during the 2 months of observation after having fallen.</li> </ul>                                                                                                                                                                              | <ul style="list-style-type: none"> <li>• Recent stroke (within 18 months);</li> <li>• Progressive neurodegenerative disorders (excluding dementia).</li> </ul>                                              |
| Ouellet M, Sirois M, Beaulieu-Bonneau S et al. [57] | 2016                | Canada    | Descriptive study | ED       | F+TA                 | Yes          | 306          | ≥ 65 | <ul style="list-style-type: none"> <li>• Independent in basic activities of daily living;</li> <li>• Visit to the Emergency Department specifically for a minor traumatic injury;</li> <li>• Discharged home within 48 hours.</li> </ul>                                                                                        |                                                                                                                                                                                                             |
| Welmerink D, Longstreth W, Lyles M et al. [58]      | 2010                | USA       | Descriptive study | H        | F                    | Yes          | 5,356        | ≥ 65 | <ul style="list-style-type: none"> <li>• Injury was the primary cause of hospitalization;</li> <li>• Presence of an E-code for falling: E880–E886, E888;</li> <li>• Available scores, for the baseline clinic visit, for 3MS (Modified Mini-Mental State Examination) and DSST (the Digit Symbol Substitution Test).</li> </ul> |                                                                                                                                                                                                             |
| Taylor M, Lord S, Brodaty H et al. [59]             | 2017                | Australia | Empirical study   | C        | F                    | Yes          | 42           | ≥ 60 | <ul style="list-style-type: none"> <li>• A clinical diagnosis of dementia;</li> <li>• Living in the community;</li> </ul>                                                                                                                                                                                                       | <ul style="list-style-type: none"> <li>• Living in long-term care;</li> <li>• Dementia or delirium or confusion at the visit;</li> <li>• Admission to any ward;</li> <li>• Inability to consent.</li> </ul> |
| National Institute on Aging [60]                    | 2009                | USA       | Grey literature   | C        | F                    | No           | -            | ≥ 65 | -                                                                                                                                                                                                                                                                                                                               | -                                                                                                                                                                                                           |
| Beaudoin F, Merchant R, Clark M [61]                | 2016                | USA       | Empirical study   | ED       | SN                   | No           | 112          | ≥ 50 | <ul style="list-style-type: none"> <li>• Taking opioids.</li> </ul>                                                                                                                                                                                                                                                             |                                                                                                                                                                                                             |
| Mahoney J, Shea T, Przybelski R et al. [62]         | 2007                | USA       | Empirical study   | C        | F                    | No           | 349          | ≥ 65 | <ul style="list-style-type: none"> <li>• Independently living;</li> <li>• History of 2 falls in the previous year; or 1 fall in the previous 2 years with injury or gait and balance problems.</li> </ul>                                                                                                                       | <ul style="list-style-type: none"> <li>• Cognitive impairment.</li> </ul>                                                                                                                                   |
| National Institute on Aging [63]                    | 2002                | USA       | Grey literature   | C        | TA                   | Yes          | -            | ≥ 65 | -                                                                                                                                                                                                                                                                                                                               | -                                                                                                                                                                                                           |
| Alden N, Rabbits A, Yurt R [64]                     | 2005                | USA       | Descriptive study | C        | B                    | Yes          | 36           | ≥ 50 | <ul style="list-style-type: none"> <li>• Documented pre-existing dementia;</li> <li>• Suffered a burn injury.</li> </ul>                                                                                                                                                                                                        |                                                                                                                                                                                                             |

## Supplementary files. The studies included in the scoping review

| Authors                                        | Year of publication | Country  | Study design      | Setting* | Types of incidents** | Participants |             |      |                                                                                                                                                                                                                                          |                                                                                                                                                                                                            |
|------------------------------------------------|---------------------|----------|-------------------|----------|----------------------|--------------|-------------|------|------------------------------------------------------------------------------------------------------------------------------------------------------------------------------------------------------------------------------------------|------------------------------------------------------------------------------------------------------------------------------------------------------------------------------------------------------------|
|                                                |                     |          |                   |          |                      | CJ***        | Sample size | Age  | Inclusion criteria                                                                                                                                                                                                                       | Exclusion criteria                                                                                                                                                                                         |
| Ehrlich A, Kathpalia S, Boyarsky Y et al. [65] | 2005                | USA      | Descriptive study | ED       | B                    | No           | 77          | ≥ 65 | <ul style="list-style-type: none"> <li>• Treated in the Emergency Department for a burn diagnosis;</li> <li>• Subsequently discharged home.</li> </ul>                                                                                   |                                                                                                                                                                                                            |
| Lester P, Kohen I [66]                         | 2008                | USA      | Author's opinion  | C        | B                    | No           | -           | ≥ 65 | -                                                                                                                                                                                                                                        | -                                                                                                                                                                                                          |
| Lowton et al. [67]                             | 2010                | UK       | Descriptive study | C        | F+B                  | No           | -           | ≥ 60 | <ul style="list-style-type: none"> <li>• Living in private or sheltered housing via two routes:</li> <li>1) those in contact for the purposes of receiving a Home Fire Safety Visit</li> <li>2) those attending Falls clinics</li> </ul> | <ul style="list-style-type: none"> <li>• Hospital admission;</li> <li>• Transfer to a burn center;</li> <li>• Elopement from the Emergency Department;</li> <li>• Chemical or non-thermal burn.</li> </ul> |
| Elder A, Squires T, Busuttill A [68]           | 1996                | Scotland | Descriptive study | C        | B                    | No           | 1096        | ≥ 75 | <ul style="list-style-type: none"> <li>• Died in household fires.</li> </ul>                                                                                                                                                             |                                                                                                                                                                                                            |
| Tierney M, Snow W, Charles J et al. [69]       | 2007                | Canada   | Descriptive study | C        | SN                   | Yes          | 139         | ≥ 65 | <ul style="list-style-type: none"> <li>• Cognitive impairment;</li> <li>• Living alone.</li> </ul>                                                                                                                                       |                                                                                                                                                                                                            |
| Charles J, Naglie G, Lee J et al. [70]         | 2015                | Canada   | Descriptive study | C        | SN                   | Yes          | 224         | ≥ 65 | <ul style="list-style-type: none"> <li>• Cognitive impairment (≤130 on the Dementia Rating Scale);</li> <li>• Living alone;</li> <li>• Having a PCP (Primary care physician).</li> </ul>                                                 | <ul style="list-style-type: none"> <li>• Living in a communal setting;</li> <li>• History of bipolar disorder or schizophrenia.</li> </ul>                                                                 |
| Barat I, Andreassen F, Damsgaard E [71]        | 2001                | Denmark  | Descriptive study | C        | SN                   | Yes          | 348         | ≥ 75 | -                                                                                                                                                                                                                                        | -                                                                                                                                                                                                          |
| Canadian Institute for Health Information [72] | 2016                | Canada   | Grey literature   | ED       | SN                   | No           | -           | ≥ 65 | -                                                                                                                                                                                                                                        | -                                                                                                                                                                                                          |
| Tierney M, Charles J, Jaglal S et al. [73]     | 2001                | Canada   | Descriptive study | C        | SN                   | Yes          | 139         | ≥ 65 | <ul style="list-style-type: none"> <li>• Suspected of having cognitive impairment;</li> <li>• Living alone.</li> </ul>                                                                                                                   |                                                                                                                                                                                                            |
| Rowe M, Feinglass N, Wiss M [74]               | 2004                | USA      | Literature review | C        | W                    | Yes          | -           | ≥ 48 | <ul style="list-style-type: none"> <li>• Persons with dementia</li> </ul>                                                                                                                                                                | -                                                                                                                                                                                                          |
| Dalsania P [75]                                | 2006                | USA      | Grey literature   | C        | TA                   | Yes          | -           | ≥ 65 | -                                                                                                                                                                                                                                        | -                                                                                                                                                                                                          |
| Booth V et al. [76]                            | 2015                | UK       | Literature review | C        | F                    | Yes          | 7 sources   | ≥ 60 | -                                                                                                                                                                                                                                        | -                                                                                                                                                                                                          |

## Supplementary files. The studies included in the scoping review

| Authors                                            | Year of publication | Country                                         | Study design      | Setting* | Types of incidents** | Participants |             |      |                                                                                               |                    |
|----------------------------------------------------|---------------------|-------------------------------------------------|-------------------|----------|----------------------|--------------|-------------|------|-----------------------------------------------------------------------------------------------|--------------------|
|                                                    |                     |                                                 |                   |          |                      | CI***        | Sample size | Age  | Inclusion criteria                                                                            | Exclusion criteria |
| Allred D, Raynor D, Hughes C et al. [77]           | 2013                | Australia, Canada, Netherlands, Sweden, UK, USA | Literature review | C        | SN                   | No           | 7653        | ≥ 65 | • Living in institutionalized care facilities.                                                |                    |
| Public Health Agency of Canada [78]                | 2009                | Canada                                          | Grey literature   | C        | TA                   | No           | -           | ≥ 65 | -                                                                                             | -                  |
| Fuller G [79]                                      | 2000                | USA                                             | Author's opinion  | C        | F                    | No           | -           | ≥ 65 | -                                                                                             | -                  |
| Al-Aama T [80]                                     | 2011                | USA                                             | Author's opinion  | C        | F                    | No           | -           | ≥ 65 | -                                                                                             | -                  |
| Rapp K, Lamb S, Büchele G et al. [81]              | 2008                | Germany                                         | Descriptive study | C        | F                    | Yes          | 365         | ≥ 60 | • Living in a nursing homes;<br>• >40% reported symptoms of low mood or cognitive impairment. |                    |
| Carpenter C, Avidan M, Wildes T et al. [82]        | 2014                | USA                                             | Literature review | ED       | F                    | No           | 3 sources   | ≥ 65 | -                                                                                             | -                  |
| Taylor M, Delbaere K, Close J et al. [83]          | 2012                | Australia                                       | Literature review | C        | F                    | Yes          | -           | ≥ 65 | -                                                                                             | -                  |
| Canadian Institute for Health Information [84]     | 2014                | Canada                                          | Grey literature   | ED       | F                    | No           | 1,537,239   | ≥ 65 | • Living in a long-term care facility.                                                        |                    |
| Institut national de santé publique du Québec [85] | 2017                | Canada                                          | Grey literature   | C        | F                    | No           | -           | ≥ 65 | -                                                                                             | -                  |

\*Setting: C = Community; ED = Emergency Department; H = Hospital;

\*\*Types of incidents are: B = burns; F = falls; SN = harm due to self-neglect; TA = traffic accidents; W = harm due to wandering;

\*\*\*CI = did the study include participants with cognitive impairment?
