# Supplementary material for: Preventing emergency department (ED) visits and hospitalisations of older adults with cognitive impairment compared with the general senior population: what do we know about avoidable incidents? Results from a scoping review
Source: PubMed Central journal article supplement — BMJ Open. 2018 Apr 17;8(4):e019908. doi: 10.1136/bmjopen-2017-019908 (PMC5905733; doi:10.1136/bmjopen-2017-019908), 2018-04-17
Supplement: bmjopen-2017-019908supp001.pdf [file bmjopen-2017-019908supp001.pdf]

**Supplementary files. The studies included in the scoping review**

| Authors                                        | Year of publication | Country | Study design      | Setting* | Types of incidents** | Participants |             |      |                                                                                                                                          |                                                                                                                                                                              |
|------------------------------------------------|---------------------|---------|-------------------|----------|----------------------|--------------|-------------|------|------------------------------------------------------------------------------------------------------------------------------------------|------------------------------------------------------------------------------------------------------------------------------------------------------------------------------|
|                                                |                     |         |                   |          |                      | CI***        | Sample size | Age  | Inclusion criteria                                                                                                                       | Exclusion criteria                                                                                                                                                           |
| Albert M, McCaig L, Ashman J [8]               | 2013                | USA     | Statistics        | ED       | F                    | No           | -           | ≥ 65 | -                                                                                                                                        | -                                                                                                                                                                            |
| Ng W et al. [9]                                | 2002                | Japan   | Descriptive study | ED       | TA+B                 | No           | 813         | ≥ 65 | • Cases of injury-related presentations in the elderly group.                                                                            |                                                                                                                                                                              |
| Canadian Institute for Health Information [10] | 2010                | Canada  | Statistics        | ED       | General              | No           | -           | ≥ 65 | • Ontario residents with an unplanned visit to the Emergency Department.                                                                 |                                                                                                                                                                              |
| Ontario Injury Prevention Resource Centre [11] | 2007                | Canada  | Statistics        | ED       | F+TA                 | No           | -           | ≥ 65 | • Visiting an Emergency Department; or<br>• Admitted to an acute care hospital.                                                          |                                                                                                                                                                              |
| Tierney M, Charles J, Naglie G et al. [13]     | 2004                | Canada  | Descriptive study | C        | SN                   | Yes          | 139         | ≥ 65 | • Living alone;<br>• Urban-dwelling.                                                                                                     | • History of bipolar disorder or schizophrenia.                                                                                                                              |
| Shaw FE, Bond J, Richardson DA, et al. [24]    | 2003                | UK      | Empirical study   | ED       | F                    | Yes          | 274         | ≥ 65 | • Cognitive impairment and dementia (Mini-MentalState Examination score < 24);<br>• Presenting to the Emergency Department after a fall. | • Medical diagnosis that likely caused the fall;<br>• Unfitness for investigation within 4 months;<br>• Inability to walk or to communicate for reasons other than dementia. |
| Shaw F [25]                                    | 2003                | UK      | Author's opinion  | C        | F                    | Yes          | -           | ≥ 65 | -                                                                                                                                        | -                                                                                                                                                                            |
| Gagnon C, Lafrance M [26]                      | 2011                | Canada  | Literature review | C        | F                    | No           | -           | ≥ 65 | -                                                                                                                                        | -                                                                                                                                                                            |
| Public Health Agency of Canada [27]            | 2011                | Canada  | Grey literature   | C        | F                    | No           | -           | ≥ 65 | -                                                                                                                                        | -                                                                                                                                                                            |
| Raina P et al. [28]                            | 1997                | Canada  | Literature review | H        | F+TA                 | No           | -           | ≥ 65 | -                                                                                                                                        | -                                                                                                                                                                            |
| Public health agency of Canada [29]            | 2008                | Canada  | Grey literature   | C        | F                    | No           | -           | ≥ 65 | -                                                                                                                                        | -                                                                                                                                                                            |

**Supplementary files. The studies included in the scoping review**

| Authors                                         | Year of publication | Country   | Study design      | Setting* | Types of incidents** | Participants |             |      |                                                                                                                                    |                                                                                           |
|-------------------------------------------------|---------------------|-----------|-------------------|----------|----------------------|--------------|-------------|------|------------------------------------------------------------------------------------------------------------------------------------|-------------------------------------------------------------------------------------------|
|                                                 |                     |           |                   |          |                      | CJ***        | Sample size | Age  | Inclusion criteria                                                                                                                 | Exclusion criteria                                                                        |
| Owens P, Russo C, Spector W et al. [30]         | 2009                | USA       | Statistics        | ED       | F                    | No           | -           | ≥ 65 | -                                                                                                                                  | -                                                                                         |
| Centers for Disease Control and Prevention [31] | 2015                | USA       | Grey literature   | C        | F                    | No           | -           | ≥ 65 | -                                                                                                                                  | -                                                                                         |
| Abrantes K et al. [32]                          | 2015                | Brazil    | Descriptive study | ED       | F+TA                 | No           | 190         | ≥ 65 | • Victims of some type of trauma (urban and rural);<br>• Served by the Mobile Emergency Service team.                              | -                                                                                         |
| Kara H, Bayir A, Ak A et al. [33]               | 2013                | Turkey    | Descriptive study | ED       | F+TA                 | No           | 568         | ≥ 65 | • Admitted to an Emergency Department of a tertiary care hospital.                                                                 | -                                                                                         |
| Public Health Agency of Canada [34]             | 2005                | Canada    | Grey literature   | C        | F                    | No           | -           | ≥ 65 | -                                                                                                                                  | -                                                                                         |
| Lee V, Wong T, Lau C [35]                       | 1999                | Hong Kong | Descriptive study | ED       | F+TA+B               | No           | 100         | ≥ 65 | • History of accidental injury at home within one week.                                                                            | -                                                                                         |
| Yeo Y, Lee S, Lim C et al. [36]                 | 2009                | Singapore | Descriptive study | ED       | F+TA                 | No           | 720         | ≥ 65 | • Visiting the Emergency Department                                                                                                | • Immediate resuscitation;<br>• Mental illness or violent behavior.                       |
| Aschkenasy M, Rothenhaus T [37]                 | 2006                | USA       | Literature review | C        | F+TA                 | No           | -           | ≥ 65 | -                                                                                                                                  | -                                                                                         |
| Lee J, Sirois M, Moore L et al. [38]            | 2015                | Canada    | Descriptive study | ED       | F+TA                 | Yes          | 1.286       | ≥ 65 | • Independently perform the seven basic activities of daily living;<br>• Emergency Department patients;<br>• Discharged back home. | -                                                                                         |
| Amador S, Goodman C, King D et al. [39]         | 2014                | UK        | Descriptive study | C        | F                    | Yes          | 133         | ≥ 65 | • Documented diagnosis of dementia; or<br>• Validated measure of cognitive function impairment.                                    | • Admitted to hospital;<br>• From long-term care facilities;<br>• Unable to give consent. |
| Burns E [40]                                    | 2001                | USA       | Literature review | ED       | F                    | No           | -           | ≥ 65 | -                                                                                                                                  | • Lacked capacity to consent;<br>• A consultee could not be identified                    |
| Ziminski C, Phillips L, Woods D [41]            | 2012                | USA       | Descriptive study | ED       | F                    | Yes          | 18344       | ≥ 65 | -                                                                                                                                  | -                                                                                         |
| Public Health Agency of Canada [42]             | 2014                | Canada    | Grey literature   | C        | F                    | No           | -           | ≥ 65 | -                                                                                                                                  | -                                                                                         |

**Supplementary files. The studies included in the scoping review**

| Authors                                                                                     | Year of publication | Country     | Study design      | Setting* | Types of incidents** | Participants |             |            |                                                                                                                                                                                                                      |                                                                                                                                                                                                         |
|---------------------------------------------------------------------------------------------|---------------------|-------------|-------------------|----------|----------------------|--------------|-------------|------------|----------------------------------------------------------------------------------------------------------------------------------------------------------------------------------------------------------------------|---------------------------------------------------------------------------------------------------------------------------------------------------------------------------------------------------------|
|                                                                                             |                     |             |                   |          |                      | CJ***        | Sample size | Age        | Inclusion criteria                                                                                                                                                                                                   | Exclusion criteria                                                                                                                                                                                      |
| Whiteman C, Tillotson R, Denne N et al. [43]                                                | 2011                | USA         | Descriptive study | ED       | F+TA                 | Yes          | 6,151       | ≥ 40       | <ul style="list-style-type: none"> <li>• Dementia and non-dementia group;</li> <li>• Presented for a major trauma visit.</li> </ul>                                                                                  | -                                                                                                                                                                                                       |
| Nourhashémi F, Andrieu S, Sastres N et al. [44]                                             | 2001                | France      | Descriptive study | ED       | F                    | Yes          | 118         | ≥ 60       | <ul style="list-style-type: none"> <li>• Patients with Alzheimer' disease</li> </ul>                                                                                                                                 |                                                                                                                                                                                                         |
| Voisin T, Sourdet S, Cantet C et al. [45]                                                   | 2009                | France      | Descriptive study | H        | F                    | Yes          | 686         | ≥ 60       | <ul style="list-style-type: none"> <li>• Alzheimer's disease;</li> <li>• Mild to moderate disease;</li> <li>• Mini- Mental State Examination score between 10 and 26;</li> <li>• Living in the community.</li> </ul> | <ul style="list-style-type: none"> <li>• Severe Alzheimer's disease;</li> <li>• Institutionalized at baseline;</li> <li>• A concomitant disorder that could affect the short-term prognosis.</li> </ul> |
| Ministry of Health (British Columbia, Canada) [46]                                          | 2006                | Canada      | Grey literature   | C        | F                    | No           | -           | ≥ 65       | -                                                                                                                                                                                                                    | <ul style="list-style-type: none"> <li>• Confusional syndromes or slight or moderate cognitive disorders.</li> </ul>                                                                                    |
| Kihlgren A, Wimo A, Mamhidir A [47]                                                         | 2014                | Sweden      | Descriptive study | C        | F                    | No           | 719         | ≥ 75       | <ul style="list-style-type: none"> <li>• Living permanently in a nursing home.</li> </ul>                                                                                                                            |                                                                                                                                                                                                         |
| Pfortmueller C, Kunz M, Lindner G et al. [48]                                               | 2014                | Switzerland | Descriptive study | ED       | F                    | No           | 6357        | ≥16<br>≥75 | <ul style="list-style-type: none"> <li>• Admitted to the Emergency Department in relation to a fall.</li> </ul>                                                                                                      |                                                                                                                                                                                                         |
| Timler D, Dworzyński M, Szarpak Ł et al. [49]                                               | 2015                | Poland      | Descriptive study | ED       | F                    | No           | 301         | ≥ 65       | <ul style="list-style-type: none"> <li>• Patients whose diagnoses were coded with ICD-10 (International Statistical Classification of Diseases) codes S00–S09 which pertain to injuries of the head.</li> </ul>      |                                                                                                                                                                                                         |
| Ministry of health planning, Office of the Provincial Health Officer, British Columbia [50] | 2004                | Canada      | Grey literature   | C        | F                    | No           | 4066        | ≥ 65       | <ul style="list-style-type: none"> <li>• Treated and released in the Emergency Department</li> </ul>                                                                                                                 |                                                                                                                                                                                                         |
| Department of Health Promotion and Protection [51]                                          | 2007                | Canada      | Grey literature   | C        | F                    | No           | -           | ≥ 65       | -                                                                                                                                                                                                                    | <ul style="list-style-type: none"> <li>• Admitted to hospital for further treatment of their injuries.</li> </ul>                                                                                       |
| Gyllencreutz L, Björnstig J, Rolfman E et al. [52]                                          | 2015                | Sweden      | Descriptive study | C        | F                    | No           | 216         | ≥ 65       | <ul style="list-style-type: none"> <li>• Fall as a pedestrian in a public area.</li> </ul>                                                                                                                           |                                                                                                                                                                                                         |

**Supplementary files. The studies included in the scoping review**

| Authors                                             | Year of publication | Country   | Study design      | Setting* | Types of incidents** | Participants |              |      |                                                                                                                                                                                                                                                                                                                                 |                                                                                                                                                                                                             |
|-----------------------------------------------------|---------------------|-----------|-------------------|----------|----------------------|--------------|--------------|------|---------------------------------------------------------------------------------------------------------------------------------------------------------------------------------------------------------------------------------------------------------------------------------------------------------------------------------|-------------------------------------------------------------------------------------------------------------------------------------------------------------------------------------------------------------|
|                                                     |                     |           |                   |          |                      | CJ***        | Sample size  | Age  | Inclusion criteria                                                                                                                                                                                                                                                                                                              | Exclusion criteria                                                                                                                                                                                          |
| Wilkins K, Park E [53]                              | 2004                | Canada    | Grey literature   | C        | F                    | No           | Older adults | ≥ 65 | -                                                                                                                                                                                                                                                                                                                               | -                                                                                                                                                                                                           |
| Douglas A, Letts L, Richardson J [54]               | 2011                | Canada    | Literature review | C        | F+B+SN+W             | Yes          | 16 sources   | ≥ 65 | -                                                                                                                                                                                                                                                                                                                               | -                                                                                                                                                                                                           |
| Taylor M, Delbaere K, Lord S et al. [55]            | 2014                | Australia | Descriptive study | C        | F                    | Yes          | 174          | ≥ 60 | <ul style="list-style-type: none"> <li>• Cognitive impairment;</li> <li>• Living in the community or a low-level care facility.</li> </ul>                                                                                                                                                                                      |                                                                                                                                                                                                             |
| Paniagua M, Malphurs J, Phelan E [56]               | 2006                | USA       | Descriptive study | ED       | F                    | No           | 117          | ≥ 65 | <ul style="list-style-type: none"> <li>• Presenting to the Emergency Department during the 2 months of observation after having fallen.</li> </ul>                                                                                                                                                                              | <ul style="list-style-type: none"> <li>• Recent stroke (within 18 months);</li> <li>• Progressive neurodegenerative disorders (excluding dementia).</li> </ul>                                              |
| Ouellet M, Sirois M, Beaulieu-Bonneau S et al. [57] | 2016                | Canada    | Descriptive study | ED       | F+TA                 | Yes          | 306          | ≥ 65 | <ul style="list-style-type: none"> <li>• Independent in basic activities of daily living;</li> <li>• Visit to the Emergency Department specifically for a minor traumatic injury;</li> <li>• Discharged home within 48 hours.</li> </ul>                                                                                        |                                                                                                                                                                                                             |
| Welmerink D, Longstreth W, Lyles M et al. [58]      | 2010                | USA       | Descriptive study | H        | F                    | Yes          | 5,356        | ≥ 65 | <ul style="list-style-type: none"> <li>• Injury was the primary cause of hospitalization;</li> <li>• Presence of an E-code for falling: E880–E886, E888;</li> <li>• Available scores, for the baseline clinic visit, for 3MS (Modified Mini-Mental State Examination) and DSST (the Digit Symbol Substitution Test).</li> </ul> |                                                                                                                                                                                                             |
| Taylor M, Lord S, Brodaty H et al. [59]             | 2017                | Australia | Empirical study   | C        | F                    | Yes          | 42           | ≥ 60 | <ul style="list-style-type: none"> <li>• A clinical diagnosis of dementia;</li> <li>• Living in the community;</li> </ul>                                                                                                                                                                                                       | <ul style="list-style-type: none"> <li>• Living in long-term care;</li> <li>• Dementia or delirium or confusion at the visit;</li> <li>• Admission to any ward;</li> <li>• Inability to consent.</li> </ul> |
| National Institute on Aging [60]                    | 2009                | USA       | Grey literature   | C        | F                    | No           | -            | ≥ 65 | -                                                                                                                                                                                                                                                                                                                               | -                                                                                                                                                                                                           |
| Beaudoin F, Merchant R, Clark M [61]                | 2016                | USA       | Empirical study   | ED       | SN                   | No           | 112          | ≥ 50 | <ul style="list-style-type: none"> <li>• Taking opioids.</li> </ul>                                                                                                                                                                                                                                                             |                                                                                                                                                                                                             |
| Mahoney J, Shea T, Przybelski R et al. [62]         | 2007                | USA       | Empirical study   | C        | F                    | No           | 349          | ≥ 65 | <ul style="list-style-type: none"> <li>• Independently living;</li> <li>• History of 2 falls in the previous year; or 1 fall in the previous 2 years with injury or gait and balance problems.</li> </ul>                                                                                                                       | <ul style="list-style-type: none"> <li>• Cognitive impairment.</li> </ul>                                                                                                                                   |
| National Institute on Aging [63]                    | 2002                | USA       | Grey literature   | C        | TA                   | Yes          | -            | ≥ 65 | -                                                                                                                                                                                                                                                                                                                               | -                                                                                                                                                                                                           |
| Alden N, Rabbits A, Yurt R [64]                     | 2005                | USA       | Descriptive study | C        | B                    | Yes          | 36           | ≥ 50 | <ul style="list-style-type: none"> <li>• Documented pre-existing dementia;</li> <li>• Suffered a burn injury.</li> </ul>                                                                                                                                                                                                        |                                                                                                                                                                                                             |

**Supplementary files. The studies included in the scoping review**

| Authors                                        | Year of publication | Country  | Study design      | Setting* | Types of incidents** | Participants |             |      |                                                                                                                                                                                                                                          |                                                                                                                                                                                                            |
|------------------------------------------------|---------------------|----------|-------------------|----------|----------------------|--------------|-------------|------|------------------------------------------------------------------------------------------------------------------------------------------------------------------------------------------------------------------------------------------|------------------------------------------------------------------------------------------------------------------------------------------------------------------------------------------------------------|
|                                                |                     |          |                   |          |                      | CJ***        | Sample size | Age  | Inclusion criteria                                                                                                                                                                                                                       | Exclusion criteria                                                                                                                                                                                         |
| Ehrlich A, Kathpalia S, Boyarsky Y et al. [65] | 2005                | USA      | Descriptive study | ED       | B                    | No           | 77          | ≥ 65 | <ul style="list-style-type: none"> <li>• Treated in the Emergency Department for a burn diagnosis;</li> <li>• Subsequently discharged home.</li> </ul>                                                                                   |                                                                                                                                                                                                            |
| Lester P, Kohen I [66]                         | 2008                | USA      | Author's opinion  | C        | B                    | No           | -           | ≥ 65 | -                                                                                                                                                                                                                                        | -                                                                                                                                                                                                          |
| Lowton et al. [67]                             | 2010                | UK       | Descriptive study | C        | F+B                  | No           | -           | ≥ 60 | <ul style="list-style-type: none"> <li>• Living in private or sheltered housing via two routes:</li> <li>1) those in contact for the purposes of receiving a Home Fire Safety Visit</li> <li>2) those attending Falls clinics</li> </ul> | <ul style="list-style-type: none"> <li>• Hospital admission;</li> <li>• Transfer to a burn center;</li> <li>• Elopement from the Emergency Department;</li> <li>• Chemical or non-thermal burn.</li> </ul> |
| Elder A, Squires T, Busuttill A [68]           | 1996                | Scotland | Descriptive study | C        | B                    | No           | 1096        | ≥ 75 | <ul style="list-style-type: none"> <li>• Died in household fires.</li> </ul>                                                                                                                                                             |                                                                                                                                                                                                            |
| Tierney M, Snow W, Charles J et al. [69]       | 2007                | Canada   | Descriptive study | C        | SN                   | Yes          | 139         | ≥ 65 | <ul style="list-style-type: none"> <li>• Cognitive impairment;</li> <li>• Living alone.</li> </ul>                                                                                                                                       |                                                                                                                                                                                                            |
| Charles J, Naglie G, Lee J et al. [70]         | 2015                | Canada   | Descriptive study | C        | SN                   | Yes          | 224         | ≥ 65 | <ul style="list-style-type: none"> <li>• Cognitive impairment (≤130 on the Dementia Rating Scale);</li> <li>• Living alone;</li> <li>• Having a PCP (Primary care physician).</li> </ul>                                                 | <ul style="list-style-type: none"> <li>• Living in a communal setting;</li> <li>• History of bipolar disorder or schizophrenia.</li> </ul>                                                                 |
| Barat I, Andreasen F, Damsgaard E [71]         | 2001                | Denmark  | Descriptive study | C        | SN                   | Yes          | 348         | ≥ 75 | -                                                                                                                                                                                                                                        | -                                                                                                                                                                                                          |
| Canadian Institute for Health Information [72] | 2016                | Canada   | Grey literature   | ED       | SN                   | No           | -           | ≥ 65 | -                                                                                                                                                                                                                                        | -                                                                                                                                                                                                          |
| Tierney M, Charles J, Jaglal S et al. [73]     | 2001                | Canada   | Descriptive study | C        | SN                   | Yes          | 139         | ≥ 65 | <ul style="list-style-type: none"> <li>• Suspected of having cognitive impairment;</li> <li>• Living alone.</li> </ul>                                                                                                                   |                                                                                                                                                                                                            |
| Rowe M, Feinglass N, Wiss M [74]               | 2004                | USA      | Literature review | C        | W                    | Yes          | -           | ≥ 48 | <ul style="list-style-type: none"> <li>• Persons with dementia</li> </ul>                                                                                                                                                                | -                                                                                                                                                                                                          |
| Dalsania P [75]                                | 2006                | USA      | Grey literature   | C        | TA                   | Yes          | -           | ≥ 65 | -                                                                                                                                                                                                                                        | -                                                                                                                                                                                                          |
| Booth V et al. [76]                            | 2015                | UK       | Literature review | C        | F                    | Yes          | 7 sources   | ≥ 60 | -                                                                                                                                                                                                                                        | -                                                                                                                                                                                                          |

**Supplementary files. The studies included in the scoping review**

| Authors                                            | Year of publication | Country                                         | Study design      | Setting* | Types of incidents** | Participants |             |      |                                                                                               |                    |
|----------------------------------------------------|---------------------|-------------------------------------------------|-------------------|----------|----------------------|--------------|-------------|------|-----------------------------------------------------------------------------------------------|--------------------|
|                                                    |                     |                                                 |                   |          |                      | CI***        | Sample size | Age  | Inclusion criteria                                                                            | Exclusion criteria |
| Allred D, Raynor D, Hughes C et al. [77]           | 2013                | Australia, Canada, Netherlands, Sweden, UK, USA | Literature review | C        | SN                   | No           | 7653        | ≥ 65 | • Living in institutionalized care facilities.                                                |                    |
| Public Health Agency of Canada [78]                | 2009                | Canada                                          | Grey literature   | C        | TA                   | No           | -           | ≥ 65 | -                                                                                             | -                  |
| Fuller G [79]                                      | 2000                | USA                                             | Author's opinion  | C        | F                    | No           | -           | ≥ 65 | -                                                                                             | -                  |
| Al-Aama T [80]                                     | 2011                | USA                                             | Author's opinion  | C        | F                    | No           | -           | ≥ 65 | -                                                                                             | -                  |
| Rapp K, Lamb S, Büchele G et al. [81]              | 2008                | Germany                                         | Descriptive study | C        | F                    | Yes          | 365         | ≥ 60 | • Living in a nursing homes;<br>• >40% reported symptoms of low mood or cognitive impairment. |                    |
| Carpenter C, Avidan M, Wildes T et al. [82]        | 2014                | USA                                             | Literature review | ED       | F                    | No           | 3 sources   | ≥ 65 | -                                                                                             | -                  |
| Taylor M, Delbaere K, Close J et al. [83]          | 2012                | Australia                                       | Literature review | C        | F                    | Yes          | -           | ≥ 65 | -                                                                                             | -                  |
| Canadian Institute for Health Information [84]     | 2014                | Canada                                          | Grey literature   | ED       | F                    | No           | 1,537,239   | ≥ 65 | • Living in a long-term care facility.                                                        |                    |
| Institut national de santé publique du Québec [85] | 2017                | Canada                                          | Grey literature   | C        | F                    | No           | -           | ≥ 65 | -                                                                                             | -                  |

\*Setting: C = Community; ED = Emergency Department; H = Hospital;

\*\*Types of incidents are: B = burns; F = falls; SN = harm due to self-neglect; TA = traffic accidents; W = harm due to wandering;

\*\*\*CI = did the study include participants with cognitive impairment?
